# 1 **A whole-cortex probabilistic diffusion tractography connectome**

---

2  
3 Burke Q. Rosen<sup>a</sup> and Eric Halgren<sup>a,b</sup>

4 <sup>a</sup> Neurosciences graduate program, University of California, San Diego  
5 La Jolla, CA, 92093, United States

6 <sup>b</sup> Departments of Radiology and Neurosciences, University of California, San Diego  
7 La Jolla, CA, 92093, United States

8

9 Correspondence:

10 bqrosen@ucsd.edu

11 Burke Rosen

12 UC San Diego Radiology Imaging Laboratory

13 3510 Dunhill St. San Diego, CA 92121

14 United States

15

## 16 **Abstract**

17 The WU-Minn Human Connectome Project (HCP) is a publicly-available dataset containing

18 state-of-art structural, functional, and diffusion-MRI for over a thousand healthy subjects. While

19 the planned scope of the HCP included an anatomical connectome, resting-state functional-

20 MRI forms the bulk of the HCP's current connectomic output. We address this by presenting a

21 full-cortex connectome derived from probabilistic diffusion tractography and organized into the

22 HCP-MMP1.0 atlas. Probabilistic methods and large sample sizes are preferable for whole-

23 connectome mapping as they increase the fidelity of traced low-probability connections. We

24 find that overall, connection strengths are lognormally distributed and decay exponentially with

25 tract length, that connectivity reasonably matches macaque histological tracing in homologous

26 areas, that contralateral homologs and left-lateralized language areas are hyperconnected, and

27 that hierarchical similarity influences connectivity. We compare the diffusion-MRI connectome

28 to existing resting-state fMRI and cortico-cortico evoked potential connectivity matrices and

29 find that it is more similar to the latter. This work helps fulfill the promise of the HCP and will

30 make possible comparisons between the underlying structural connectome and functional  
31 connectomes of various modalities, brain states, and clinical conditions.

32

33 **Keywords:** Diffusion MRI, structural connectome, tractography, Human Connectome Project

34

### 35 **Significance Statement**

36 The tracts between cortical parcels can be estimated from diffusion MRI, but most studies  
37 concentrate on only the largest connections. Here we present an atlas, the largest and most  
38 detailed of its kind, showing connections among all cortical parcels. Connectivity is relatively  
39 enhanced between frontotemporal language areas and homologous contralateral locations. We  
40 find that connectivity decays with fiber tract distance more slowly than predicted by brain  
41 volume and that structural and stimulation-derived connectivity are more similar to each other  
42 than to resting-state functional MRI correlations. The connectome presented is publicly  
43 available and organized into a commonly used scheme for defining brain areas in order to  
44 enable ready comparison to other brain imaging datasets of various modalities.

---

45

### 46 **Introduction**

47 In the 21<sup>st</sup> century, advances in computation, theory, and neuroimaging have spurred a broad  
48 and intense interest in the anatomical connections and physiological correlations among  
49 human brain areas. Bivariate functional connectivity has given way to full functional  
50 connectomes, the most comprehensive of which may be the WU-Minn Human Connectome  
51 Project's (HCP) resting-state fMRI dense connectome (Van Essen et al., 2013). The planned  
52 scope of WU-Minn HCP also included a full anatomical connectome (Van Essen and Ugurbil,  
53 2017), and the project has collected, curated, and preprocessed diffusion imaging (dMRI) data

54 for 1,065 subjects. However, a structural connectome has to-date not been released for these  
55 data. This report seeks to address this omission by presenting a full-cortex anatomical  
56 connectome derived from local, probabilistic tractography.

57 dMRI techniques detect white matter by registering the orientation biases of water  
58 molecule diffusion within myelinated axons. The majority of dMRI studies focus on differences  
59 in specific connections between treatment groups. In contrast, we seek here to present a  
60 robust, densely populated average connectivity matrix for the entire cortex using data from a  
61 large, healthy sample. Local dMRI fiber tract tracing algorithms can be broadly organized into  
62 two classes: deterministic e.g. dsi-studio (Yeh et al., 2013), and probabilistic e.g. probtrackX  
63 (Behrens et al., 2007). Deterministic tractography considers the most likely orientation at each  
64 voxel yielding the maximum likelihood tracts whereas probabilistic tractography considers the  
65 entire distribution of possible orientations, yielding a probability cloud of connections. As our  
66 goal is instead to explore all possible connections between regions, we employed local,  
67 probabilistic tractography (Behrens et al., 2007). This method has been validated against  
68 macaque retrograde tracers within-species (Donahue et al., 2016) and the dMRI protocol and  
69 equipment used for the WU-Minn HCP database were optimized in anticipation of this analysis  
70 (Sotiropoulos et al., 2013).

71 The physiological relevance of a connectome is maximized if its nodes form functionally  
72 distinct areas. Within the scope of cortex, this amounts to selecting a parcellation scheme. The  
73 HCP multi-modal parcellation (HCP-MMP1.0) (Glasser et al., 2016) has several advantages: it's  
74 boundaries are both functionally and anatomically guided, it has sufficient parcels (360) to  
75 generate a rich connectome while few enough that the parcels' extents comfortably exceed the  
76 dMRI voxel size, and mechanisms exist (Fischl et al., 2004) for it to be readily applied to  
77 individuals. Most importantly, the HCP-MMP1.0 parcellation is publicly available and widely

78 adopted, facilitating the comparison of the generated matrices to other structural and  
79 functional connectomes.

80       Given the computational intensity of dMRI fiber tractography and the field's inclination  
81 towards elucidating specific connections, it is not surprising that the number of existing  
82 publicly available dMRI datasets exceeds that of finished, readily applicable connectivity  
83 matrices. However, there do exist some prior examples. The USC Multimodal connectivity  
84 database (<http://umcd.humanconnectomeproject.org>), contains two dMRI tractography  
85 connectomes with standard surface-based parcellations: Hagmann (Hagmann et al., 2008) and  
86 ICBM (Mori et al., 2008), with sample-sizes of 5 and 138, respectively. A third is available at  
87 <http://www.dutchconnectomelab.nl> which contains 114 controls. All of these use the Desikan-  
88 Killiany atlas (Desikan et al., 2006) which consists of 68 cortical parcels and were produced  
89 with deterministic tractography. An atlas of major fiber tracts for the HCP 1200 cohort has  
90 recently released at <http://brain.labsolver.org>, (Yeh et al., 2018). However, this deterministic  
91 tractography connectome is spatially coarse, consisting of only 54 cortical parcels, and lacks  
92 dynamic range and statistical dispersion, as weaker connections are unrepresented, rendering  
93 the connectivity matrix nearly binary. The HCP-MMP1.0 atlas employed here has more than  
94 five times as many parcels while retaining the functional distinctness of areas. In contrast to the  
95 relatively sparse existing deterministic matrices, the probabilistic approach may better resolve  
96 weak or low probability connections leading to densely populated connectivity matrices like  
97 those found non-human primate tracing studies (Markov et al., 2014). Furthermore, the cohort  
98 studied is large and many other types of data are available for the same individuals including  
99 the NIH neuropsychological toolbox (Gershon et al., 2013), as well as fMRI and MEG data for

100 resting-state and cognitive tasks, permitting within-cohort comparison to functional  
101 connectivity.

102 The following report presents a novel structural connectome of the human neocortex based  
103 on probabilistic diffusion tractography. The connectome is partially validated against  
104 retrograde tracing in macaques and the relationship between tract length and connection  
105 strength is quantified. Further validation is provided by reasonable connectivity properties  
106 between contralateral homologous parcels, within language cortex, and between parcels lying  
107 at similar levels of the cortical hierarchy. Finally, the dMRI connectome is compared to cortico-  
108 cortico evoke potential (CCEP) and resting-state fMRI derived connectivity.

109

## 110 **Materials & Methods**

### 111 **Subjects & data sources**

112 No new data was collected for this study, and the existing data used was gathered  
113 from publicly available databases. Individual subject's high-resolution T1-weighted  
114 structural magnetic resonance volumes (MRI), Diffusion images (dMRI), and group  
115 average grayordinate resting-state function MRI (rs-fMRI) connectivity were gathered  
116 from the Human Connectome Project's (HCP) WU-Minn 1200 release (Van Essen et al.,  
117 2013) at <https://db.humanconnectome.org>. The diffusion imaging dataset consists of  
118 1065 individuals (575 women), aged 22-36+ years old. These datasets include some  
119 twin and non-twin siblings. However, individuals' family structure, as well as exact age,  
120 handedness, and ethnicity are access-restricted to protect the privacy of the subjects  
121 and these data were not requested as they are not critical to this study. Group-average  
122 dense T1w/T2w myelination index were gathered from the same source. Macaque

123 retrograde tracer connectivity was sourced from supplementary table 6 of (Markov et  
124 al., 2014). Parcel-by-parcel values were averaged across monkey and hemisphere.  
125 Group average, parcellated cortico-cortico evoked potential (CCEP) connectivity was  
126 gathered from the v1903 release of the Functional Brain Tractography project (F-  
127 TRACT) (David et al., 2013; Trebault et al., 2018) at <https://f-tract.eu>.

128

### 129 **Cortical parcellation & functional networks**

130 The HCP multimodal parcellation scheme (HCP-MMP1.0), consisting of 180 cortical parcels  
131 per hemisphere, was projected from the Workbench (Marcus et al., 2011) 32k grayordinate  
132 template brain to the FreeSurfer (Fischl, 2012) ico5 fsaverage template as per (Coalson et al.,  
133 2016). Using the FreeSurfer reconstruction directories gathered from the database, surface-  
134 based fsaverage parcel labels were mapped onto each individual's white matter surface using  
135 spherical landmark registration (`fs_label2label`), (Fischl et al., 1999). Grayordinate rs-fMRI  
136 connectivity values were morphed to the ico5 fsaverage template then averaged within each  
137 parcel. Finally, individual's surface-based parcel labels were converted to binary volumes  
138 marking the gray matter — white matter boundary (`mri_label2vol`) to serve as seed and  
139 target regions for probabilistic tractography. Workbench and FreeSurfer functions were  
140 sourced from releases 1.2.3 and 6.0, respectively.

141 To facilitate interpretation of the connectome, parcels were ordered and grouped into  
142 functional networks adapted from (Ji et al., 2019), which applied iterative Louvain clustering  
143 (Blondel et al., 2008; Rubinov and Sporns, 2010) and other criteria to a resting-state fMRI  
144 connectivity. These functional groupings and parcel order were selected as they were also  
145 generated using (a subset of) the WU-Minn HCP dataset and the HCP-MMP1.0 parcellation  
146 scheme. For this study the parcels of the left and right hemispheres were separated and the

147 order and groupings of the left hemisphere in (Ji et al., 2019) were used for homologous  
148 parcels in the both right and left hemisphere, respectively. Two pairs of the original networks  
149 (primary and secondary visual, ventral and posterior multimodal) contained too few parcels for  
150 effective analysis and were highly inter-related. These network pairs were simplified by  
151 combining them into visual and multimodal groups, yielding 10 functional networks per  
152 hemisphere, see table 2.

153

### 154 **Probabilistic tractography**

155 All analysis of diffusion imaging data was performed with FSL (Behrens et al., 2007; Jenkinson  
156 et al., 2012) release 6.0.1. Analyses were performed identically for each subject and broadly  
157 follow (Burns, 2014). The diffusion and bedpostX precursor directories made available from the  
158 HCP database were used as inputs without modification. The WU-Minn HCP diffusion data are  
159 is correction for eddy currents and movement with FSL eddy (Andersson and Sotiropoulos,  
160 2016). Subjects' estimated displacement over time from their initial position is written to the  
161 eddy\_restricted\_movement\_rms output. Using these data , a scalar index of each subject's  
162 motion was derived by integrating their displacement over time.

163 Fractional anisotropy (FA) analysis was performed using `dtifit`. The resulting FA volumes  
164 were not analyzed but only used for registering the FreeSurfer and dMRI volumes (`fslirt`), as is  
165 necessary to map the parcel masks into dMRI space (`probtrackx2` arguments `--xfm --`  
166 `seedref`). Non-invasive probabilistic tractography was performed with `probtrackx2` in voxel-  
167 by-parcel mode (`--os2t --s2tastext`). In this configuration, the number and length of  
168 streamlines (`--omp1 --opd`) is estimated from each voxel in the seed parcel to each target  
169 parcel as a whole. To aid parallelization of these computationally intensive processes, the list  
170 of target parcels (`--targetmasks`) was quartered into four sub-lists. Therefore `probtrackx2`  
171 was invoked 1440 times per subject, estimating the connectivity between 1 seed parcel and 90

172 target parcels in each invocation. The default ½ voxel step length, 5000 samples and 2000  
173 steps were used (`--steplength 0.5 -P 5000 -s 2000`). To avoid artifactual loops,  
174 streamlines that loop back on themselves were discarded (`-l`) and tractography was  
175 constrained by a 90° threshold (`-c 0`) for maximal curvature between successive steps. Within-  
176 parcel connectivity and cortico-subcortical connectivity were not examined in this study. All  
177 post-hoc analyses and visualization of connectivity data were performed in Matlab 2019b  
178 (Mathworks) except for figure **1C** which was rendered in fsleyes.

179

### 180 **Normalization & symmetrization**

181 Raw streamline counts were averaged across all subjects, then normalized and symmetrized  
182 following procedure developed for non-human primate histological tracing (Donahue et al.,  
183 2016; Theodoni et al., 2020). Briefly, fractionally scaled values are defined as the ratio of the  
184 number of streamlines originating at parcel A and terminating at parcel B to the total number of  
185 streamlines that either originate at parcel A or terminate at parcel B while excluding within-  
186 parcel connections.

187

188 Eq. 1  $F(DTI_{i,j}) = \frac{DTI_{i,j}}{\sum_{x=1}^N DTI_{i,x} + \sum_{y=1}^N DTI_{y,j}}$ , where  $x \neq i$  &  $y \neq j$

189

190 Fractional scaling is one of several plausible normalization strategies. Because we used  
191 5000 samples (`-P 5000`) and voxel-by-parcel mode (`--os2t`) in our probtrackX invocation, the  
192 maximum possible raw streamline count between any two parcels is 5000N where N is the # of  
193 voxels in the seed parcel. Note that because, for probtrackX, all parcels were defined as a  
194 single layer of 1mm isotropic voxels at the white matter — gray matter interface, Ni is also  
195 equivalent to the area of the seed parcel, in mm<sup>2</sup>. As shown in extended data figure **1-1**, We



196 examined four strategies for normalizing the raw streamline counts: (1) dividing by the number  
197 of samples, 5000, (2) dividing by the number of samples and seed area,  $5000N_i$ , (3) dividing by  
198 the number of samples and the areas of both the seed and target parcels,  $5000N_i^{0.5}N_j^{0.5}$ , and (4)  
199 fractional scaling, see Eq. 1. These approaches yield similar connectivity matrices, distributions  
200 of pairwise connectivity, and rates of connectivity fall-off with fiber tract distance. The choice of  
201 normalization does shift the absolute scale of pairwise connectivity strengths, but as this effect  
202 is mostly homogenous across all connections, subsequent analyses are not greatly affected.  
203 The correlation coefficient of connectivity strengths between normalization techniques exceeds  
204 0.97 for all pairwise comparisons, and exceeds 0.99 if the samples-only normalization  
205 approach is excluded (data not shown).

206 While diffusion tractography is not sensitive to the directionality of connections, because  
207 parcel A to B and parcel B to A streamlines are computed separately minor asymmetries arise.  
208 Connectivity matrix symmetry is enforced by taking the arithmetic mean of the A-B and B-A  
209 fractionally scaled connection weights.

210

211 Eq. 2  $F_{i,j} = \frac{F_{i,j} + F_{j,i}}{2}$

212

213 Because probabilistic tractography values span several orders of magnitude, and are  
214 approximately log-normally distributed (Fig. **1-1 B**), data were log-transformed ( $\log_{10}$ ) prior to  
215 subsequent analyses. The CCEP and rs-fMRI connectivity matrices were (re)normalized  
216 following the same procedure. However the rsMRI connectivity values were not log-  
217 transformed because these data are already approximately normally distributed, if bimodal, in  
218 linear space, see figure **9B**.

219

## 220 **Network theory metrics**

221 All network theoretic measures were computed in matlab using the Brain Connectivity Toolbox,  
222 2019-03-03 release (Rubinov and Sporns, 2010). It is available at [http://www.brain-](http://www.brain-connectivity-toolbox.net)  
223 [connectivity-toolbox.net](http://www.brain-connectivity-toolbox.net) or <https://www.nitrc.org/projects/bct>. The definitions for the metrics  
224 used (for binary and undirected networks) are repeated below.

225

### 226 Precursor measures

227

$$228 \text{ Eq. 3 } d_{i,j} = \sum_{a_{u,v} \in g_{i \leftrightarrow j}} a_{u,v}$$

229

230 Where  $d_{i,j}$  is the shortest path length, a basis for measuring integration, between nodes  $i$  and  $j$ ,  
231  $N$  is the set of all nodes in the network,  $n$  is the number of nodes, and  $a_{u,v}$  is the binarized  
232 connectivity between nodes  $u$  and  $v$ .

233

$$234 \text{ Eq. 4 } t_i = \frac{1}{2} \sum_{j,h \in N} a_{i,j} a_{i,h} a_{j,h}$$

235

236 Where  $t_i$  is the number of triangles, a basis for measuring integration, around node  $i$ .

237

$$238 \text{ Eq. 5 } k_i = \sum_{j \in N} a_{i,j}$$

239

240 Where  $k_i$  is the number of degree, or number of links, connected to node  $i$ .

241

### 242 Mean Clustering Coefficient (MCC)

243

244 Eq. 6  $C_i = \frac{1}{n} \sum_{i \in N} \frac{2t_i}{k_i(k_i-1)}$

245

246 Where  $C_i$  is the clustering coefficient of node  $i$ . ( $C_i = 0$  for  $k_i < 2$ ), (Watts and Strogatz, 1998).

247

248 Eq. 7  $MCC = \frac{1}{n} \sum_{i \in N} C_i$

249

250 Characteristic Path Length (CPL)

251

252 Eq. 8  $L_i = \frac{1}{n} \sum_{i \in N} \frac{\sum_{j=1, j \neq i}^n d_{i,j}}{n-1}$

253

254 Where  $L_i$  is the number of the average distance between node  $i$  and all other nodes, (Watts and  
255 Strogatz, 1998).

256

257 Eq. 9  $CPL = \frac{1}{n} \sum_{i \in N} L_i$

258

259 Global Efficiency

260

261 Eq. 10  $E_i = \frac{1}{n} \sum_{i \in N} \frac{\sum_{j \in N, j \neq i}^n d_{i,j}^{-1}}{n-1}$

262

263 Where  $E_i$  is the efficiency of node  $i$ .

264

265 Eq. 11  $E = \frac{1}{n} \sum_{i \in N} E_i$

266

267 Where  $E$  is the global efficiency of the network, (Latora and Marchiori, 2001).

268

269 Modularity

270

271 Eq. 12  $Q = \frac{1}{l} \sum_{i,k \in N} \left( a_{i,j} - \frac{k_i k_j}{l} \right) \delta_{m_i, m_j}$

272

273 Where  $l$  is the number of links in the network,  $m_i$  is module containing node  $i$ ,  $\delta_{m_i, m_j} = 1$  if  $m_i =$   
274  $m_j$ , and 0 otherwise, and  $Q$  is the global efficiency of the network, (Newman, 2004).

275

276 Gamma (normalized MCC)

277

278 Eq. 12  $\gamma = \frac{MCC}{MCC_{rand}}$

279

280 Where  $MCC_{rand}$  is the  $MCC$  of a random network of the same statistical makeup.

281

282

283 Lambda (normalized CPL)

284

285 Eq. 13  $\lambda = \frac{CPL}{CPL_{rand}}$

286

287 Where  $CPL_{rand}$  is the  $CPL$  of a random network of the same statistical makeup. Note that this  
288 measure is unrelated to the length constant  $\lambda$ .

289

290

291 Small Worldness

292

293 Eq. 14  $S = \frac{\gamma}{\lambda}$

294

295 Where  $S$  is the network small-worldness (Humphries and Gurney, 2008).

296

297 Transitivity

298

299 Eq. 15  $T = \frac{\sum_{i \in N} 2t_i}{\sum_{i \in N} k_i(k_i - 1)}$

300

301 Where  $T$  is the transitivity of the network (Newman, 2003).

302

303 Assortativity

304

305 Eq. 16  $r = \frac{l^{-1} \sum_{(i,j) \in L} k_i k_j - \left[ l^{-1} \sum_{(i,j) \in L} \frac{1}{2} (k_i + k_j) \right]^2}{l^{-1} \sum_{(i,j) \in L} \frac{1}{2} (k_i^2 + k_j^2) - \left[ l^{-1} \sum_{(i,j) \in L} \frac{1}{2} (k_i + k_j) \right]^2}$

306

307 Where  $L$  is the set of all links and  $r$  is the assortativity coefficient of the network (Newman,

308 2003).

309

310 Network Density

311

312 Eq. 17  $D = \frac{l}{n^2 - n}$

313

314 Where  $D$  is the density of the network before thresholding and binarization.

315

## 316 **Results**

### 317 **A whole-cortex structural connectome**

318 Figure **1A** shows the group average parcel to parcel and probabilistic diffusion tractography

319 connectome. This matrix consists of connectivity among 360 cortical parcels and is further

320 organized into 10 functional groups (Ji et al., 2019) per hemisphere. The raw probabilistic

321 tractography streamline counts have been normalized by fractionally scaling (Eq. 1) into log

322 probabilities ( $F_{pt}$ ) following procedures developed for tracing non-human primate connectivity.

323 As dMRI reveals structural connections, the network is undirected and therefore symmetric.

324 The main diagonal is masked as intra-parcel connectivity was not examined in this study. The

325 upper left quadrant shows connectivity among the 180 parcels of the left hemisphere, the

326 lower right quadrant the connectivity within the right hemisphere. The upper right and lower left

327 quadrants are duplicates and show the inter-hemispheric, or callosal, connections. The 180<sup>th</sup>

328 (or half-) diagonal is clearly visible (white arrows); this shows the connectivity between

329 homologous parcels in the right and left hemispheres, which is greater than non-homologous

330 callosal connectivity for most parcels.

331 After  $\log_{10}$  transformation,  $F_{pt}$  connectivity among all parcel pairs is approximately Gaussian

332 in distribution with a mean -3.903 ( $CI_{95\%} = [-3.910 -3.897]$ ), standard deviation 0.8111 ( $CI_{95\%} =$

333  $[0.806 0.816]$ ), skewness 0.627 ( $CI_{95\%} = [0.6082 0.6440]$ ), and kurtosis 3.605 ( $CI_{95\%} = [3.5603$

334  $3.6498]$ ). In addition to bringing the range of  $F_{pt}$  values into the same order of magnitude,  $\log_{10}$

335 transformation is justified as it brings the distribution's skewness significantly closer to zero

336 (pre- $\log_{10}$ : 9.047,  $CI_{95\%} = [8.719 9.469]$ ), and kurtosis significantly closer to three, pre- $\log_{10}$ :

337 103.684 ( $CI_{95\%} = [93.991 117.026]$ ) thus bringing the distribution closer to normality. See

338 extended data figure **1-1 B,C** for a graphical comparison. Empirical confidence intervals were  
339 estimated via bootstrapping with 2000 iterations. The values of the group average and  
340 individual probabilistic dMRI connectivity matrices, as well as all other figure source data can  
341 be found at <https://doi.org/10.5281/zenodo.4060485>.

342

### 343 **Tract length strongly predicts connectivity strength, with exponential decay**

344 In addition to the connection strength, diffusion tractography estimates the fiber tract length  
345 between all pairs of parcels. As shown in figure **2**, structural connectivity ( $10^{F_{pt}}$ ) falls off as an  
346 exponential function of fiber tract length with the form  $10^{F_{pt}} = \alpha e^{-d/\lambda}$  where  $\lambda$  is the length  
347 constant,  $\alpha$  the scaling coefficient, and  $d$  the tract length. Alternative functional forms were  
348 examined (see figure **2-2**), but the exponential was selected for parsimony, goodness-of-fit,  
349 and concordance with histological tracing data (see Discussion). Note that  $\lambda$  is sometimes  
350 reported in inverted units of  $\text{mm}^{-1}$ , e.g. (Markov et al., 2013; Theodoni et al., 2020), but we here  
351 use the  $\lambda$  convention from neuronal cable theory (Dayan and Abbott, 2001) which has more  
352 intuitive units (mm); the conventions are conceptually equivalent. For the group-average  
353 connectome,  $\lambda = 23.4$  mm and the least squares exponential fit explains 84% of the variance in  
354  $10^{F_{pt}}$  across all parcel pairs. Callosal connectivity, when isolated, decays more slowly with  
355 respect to tract length,  $\lambda = 32.8$ , and hews to the exponential expectation less consistently  $r^2 =$   
356 0.62. Because the tracing of long fiber tracts may be hampered by poor scan quality, we  
357 investigated the effects of subjects' motion on  $\lambda$ . For each subject,  $\lambda$  was calculated for non-  
358 zero connections in the same manner as the group average. While subjects' motion within the  
359 scanner does reduce  $\lambda$ , this effect is modest, only explaining 1.96% of the inter-subject  
360 variance, see figure **2-2**.

361

## 362 **Inter-individual variability**

363 The inter-individual variability of connectivity was assessed by deriving the across-subject  
364 coefficient of variation, CV, for each pairwise connection  $F_{pt}$ , see figure **3**. For this analysis, the  
365 normalization, symmetrization, and  $\log_{10}$ -transformation of raw connectivity values was  
366 performed on each subject. Pairwise connections with zero streamlines were not log-  
367 transformed in order to avoid infinities. While there is no clear relationship between fiber tract  
368 distance and inter-individual variability, the most consistent connection appear in two clusters  
369 of around 50-100 mm and 170-225 mm (Fig. **3B**) . When the most consistent quintile of  
370 connections is isolated (Roberts et al., 2017), connectivity falls off more slowly with tract  
371 distance, with  $\lambda$  increasing to  $\sim 28$  mm (Fig. **3D**). Since the proportional size of V1/V2 varies  $\sim 3$ -  
372 fold across individuals and is highly heritable (Yoon et al., 2019), we hypothesized that the  
373 ipsilateral V1-V2 connection would also be highly variable, with that variability being correlated  
374 across hemispheres. Indeed, we find that the ipsilateral V1 – V2 connection is very strong, with  
375  $\sim 1.8$  fold variability which is strongly correlated across hemispheres ( $r=0.70$ ). The scatter-plot  
376 of right vs. left  $F_{pt}$  values for this connection across subjects (Fig. **3F**) does not reveal obvious  
377 outliers which would be indicative of subject-specific artifacts. This analysis of inter-individual  
378 variability should be considered preliminary. The WU-Minn HCP dataset is rich in individual  
379 data, including the NIH neuropsychological toolbox (Gershon et al., 2013), twin and non-twin  
380 siblings subsets, and genotypic data ([dbGaP phs001364.v1.p1](#)), though the latter two data  
381 types are only available by application in order to ensure subject anonymity. With access to  
382 these data, a full examination of inter-individual variability, including assessing the heritability  
383 and genetic correlates of the strength of specific connections could be made.

384



385 **Probabilistic dMRI tract tracing in humans reasonably corresponds with histological fiber**  
386 **tracing in macaques**

387 The development of both the HCP-MMP1.0 human cortical atlas (Glasser et al., 2016) and FV91  
388 macaque parcellation scheme (Felleman and Van Essen, 1991) were led by David Van Essen and  
389 the parcel definitions of the human atlas were informed by human-macaque homology. As such,  
390 the parcel names of these atlases have considerable overlap, particularly for visual and visual  
391 association areas as well as the non-visual parcels 1, 2, 25, and 44. We therefore assumed that  
392 parcels with the same name were roughly homologous and limited the scope of the inter-species  
393 comparison to these parcels. Furthermore, the macaque FLne values found in (Markov et al.,  
394 2014) are directly comparable to fractionally scaled Fpt values (Donahue et al., 2016). Comparing  
395 the pairwise connectivity between species, we found a Pearson correlation of  $r = 0.35$  ( $p =$   
396  $0.0013$ ), see figure 4. Considering that for macaques, Donahue and colleagues (2016) found a  
397 *within-species*, between-technique correlation of  $r = 0.59$  when comparing retrograde tracing  
398 and probabilistic diffusion tractography, we find the magnitude of *between-species* correlation  
399 to be reasonable supporting evidence for the efficacy of the technique.

400

401 **Contralateral connectivity exceeds ipsilateral connectivity in some regions**

402 On the whole, cortical connectivity is dominated by ipsilateral connections. This effect is  
403 readily-observed by comparing the ipsilateral and contralateral quadrants of figure **1A**.  
404 However, there are exceptions to this rule. The differential connectome of ipsi- vs. contra-  
405 lateral connections is shown in figure **5**. This is achieved by subtracting the mean of left-right  
406 and right-left contralateral connectivity from the mean of the right and left ipsilateral  
407 connectivity, i.e. subtracting the mean of the first and third quadrants from the mean of the  
408 second and fourth. A cingulo-parietal somatomotor region (parcels 5m, 5L, 24dd, and 24dv)

409 are more strongly connected to most contralateral cortex than ipsilateral cortex. Lateromedial  
410 connectivity in select prefrontal (a10p, a9-46v, a10p, p10p, p47r, p9-46v, 11l, IFSa, IFJp, a24,  
411 d32, p32, 10r) and postcentral – superior parietal lobule (LIPv, VIP, 7AL, 7PC, 1, 2, 3a, 6d, 31a,  
412 31pd, PCV) regions is stronger between hemispheres than within them. We speculate that a  
413 possible commonality between these three regions is that they have been broadly implicated in  
414 the unitary processes of somatosensory object recognition, emotion, and spatial cognition,  
415 respectively. Conversely, the entire auditory network and superior temporal cortices (STGa,  
416 STSda, DTDdp, A5, and TPOJ1) as well as the operculum and temporoparietal junction (Ilg, MI,  
417 FOP1-FOP5, OP1-OP4, PF, PFcm, PFop, PI, Pol1, Pol2, and 43) have pronounced hyper-  
418 ipsilateral connectivity, consistent with the low transmission latency required for auditory  
419 processing, the left-lateralization of language, and the right lateralization of attention.

420

421 **With the exception of some language areas, most parcels are disproportionately**  
422 **connected to their contralateral homologs**

423 The two hemispheres of the cortex have a high degree of functional and anatomical symmetry.  
424 It follows then that most regions will have greater connectivity to their contralateral homologs  
425 than other contralateral areas, in order to coordinate their overlapping processing tasks. This is  
426 hinted at by the visibility of the 180<sup>th</sup>, (or half-) diagonal in figure **1A**. To further quantify this  
427 effect, for all 180 parcels we compared the connectivity between interhemispheric homologs to  
428 the mean of all other callosal connectivity. Bonferroni corrected, empirical 95% confidence  
429 intervals were estimated via bootstrapping with 2000 iterations. As detailed in extended data  
430 figure **6-1** and visualized in Figure **6**, 147 parcels are hyperconnected to their contralateral  
431 homologs, 18 are hypoconnected, and 15 have homologous callosal connectivity not  
432 significantly different than their callosal mean connectivity. Interestingly, parcels that are not

433 hyper-connected to their contralateral homologs are concentrated within and adjacent to the  
434 language network, consistent with the greater degree of lateralization in these areas.

435

### 436 **The language network is hyper-connected at long distances and left lateralized**

437 In order to investigate distance-resolved left laterality in connections among language-  
438 implicated cortex, pairwise connections were binned by fiber tract length in 15 mm increments.  
439 Within each bin, connections were grouped as being within the combined language and  
440 auditory network, or between the combined networks and the rest of the cortex. For each  
441 subject, the  $F_{pt}$  of grouped connections within each bin was averaged before being log-  
442 transformed. The grand-averages of these within- and between- language/auditory cortex in  
443 each distance bin for each hemisphere are shown in figure **7A**. Bonferroni corrected, empirical  
444 95% confidence intervals for these grand-averages were estimated via bootstrapping with  
445 2000 iterations. Within-language connectivity is slightly attenuated at distances less than 100  
446 mm, but strongly amplified at distances above 100 mm, especially ~100-140 mm connections  
447 in the left hemisphere. A plurality of these are between frontal and temporoparietal language  
448 areas (18/45 connections between 100 and 140mm). The differential traces of between- vs.  
449 within-language connectivity (Fig. **7B**) clearly show the left-hemisphere dominance of this  
450 effect.

451

### 452 **Connectivity is influenced by the cortical hierarchy**

453 Hierarchy is a central organizing principle of the cortex (Burt et al., 2018; Felleman and Van  
454 Essen, 1991; Markov et al., 2014; Theodoni et al., 2020). Higher order areas, e.g. supporting  
455 abstract processing, have low myelination, and lower order areas, e.g. supporting unimodal  
456 sensory processing, have high myelination. Furthermore, areal myelination is indexed by the

457 ratio between T1- and T2-weighted MRI contrast (Glasser and Van Essen, 2011). The WU-Minn  
458 HCP 1200 release includes smoothed group-average myelination indices for all vertices in the  
459 32k grayordinate template brain. These values were averaged for each parcel in the HCP-  
460 MMP1.0 atlas (Glasser et al., 2016) to yield a group-average parcel-wise index of myelination.

461 The relationship between cortical hierarchy and connectivity was assessed in two ways. We  
462 first examined whether regions of similar level in the cortical hierarchy are better connected, as  
463 predicted by (Barbas, 2015). An index of hierarchical similarity,  $F_{|\Delta \text{myelination}|}$ , was obtained for  
464 each pair of parcels by computing the pairwise difference in myelination between parcels and  
465 fractionally scaling it in the same manner as  $F_{pt}$ , with smaller values indicating hierarchical  
466 closeness. The similarity matrix created by this derivation is shown in figure **8-1**. Correlations  
467 were obtained for the left and right hemisphere as a whole as well as the colossal connections,  
468 figure **8A**. In addition, for each of the twenty functional networks (10 per hemisphere) the  
469 Pearson correlation between the  $F_{|\Delta \text{myelination}|}$  and  $F_{pt}$  for pairwise within-network connections  
470 was computed, see figure **8B**. With the exception of the interhemispheric connections,  
471 calculations were performed on the hemispheres separately to avoid the collinearity introduced  
472 by hemispheric homology.

473 With the exceptions of the bilateral visual and somatomotor networks and right language  
474 network, for which there is convincingly no relationship, the preponderance of coefficients are  
475 negative, indicating that, on average, areas at similar levels of the cortical hierarchy are better  
476 connected. However, quantified in this way, the influence of hierarchy is modest, explaining  
477 about 1% of the variance in  $F_{pt}$  overall, though perhaps 10-30% in certain subsets of parcels,  
478 such as the left auditory and language networks. The left lateralization of the influence of  
479 hierarchy in these networks is striking, as is the right-lateralization of the dorsal attention  
480 network.

481 Secondly, we investigated whether a cortical region's hierarchical level affected its overall  
482 connectivity. For each parcel, the Pearson correlation between the parcel's  $F_{pt}$  to all other  
483 parcels and the parcel-wise index of myelination was computed. In other words, correlation  
484 between each row of the connectome matrix and the vector of myelination indices was obtained.  
485 After Bonferroni correction for multiple comparisons, 74 of 360 parcels (see extended data  
486 figures **8-2**, **8-3**) have connectivity significantly correlated to their myelination index and of these  
487 the vast majority (70) are negatively correlated, indicating that low myelination predicts high  
488 connectivity, see figure **8C**. These areas form a contiguous bilateral prefrontal network as  
489 shown in figure **8D**, indicating that prefrontal areas are more connected with higher cortical  
490 regions. The rare positively correlated exceptions are the left and right DVT and V6A.

491

#### 492 **Probabilistic dMRI connectivity more closely resembles CCEPs than resting-state fMRI**

493 In order to further contextualize the dMRI connectome, we compared it to existing  
494 connectivity matrices generated from two other brain mapping modalities: cortico-cortico  
495 evoked potential probability (CCEP) and resting-state fMRI correlation magnitude (rs-fMRI). As  
496 shown figure **9A**, the qualitative pattern of rs-fMRI markedly differs from the other two  
497 modalities with proportionally stronger ipsilateral across-network connections and especially  
498 non-homologous contralateral connections, though the latter is somewhat obscured for CCEPs  
499 due to sparse spatial sampling. Over all connections, pairwise probabilistic dMRI connectivity  
500 values are nearly twice as linearly correlated to pairwise CCEP connectivity than to rs-fMRI  
501 connectivity (fig. **9B**), and this contrast is equally evident in the ipsilateral connection within  
502 each hemisphere, see figure **9-1**. Contralateral connections were not examined in isolation as  
503 contralateral sampling for the CCEP modality is relatively rare.

504 When comparing the distributions of pairwise connectivity strength (fig. **9C**), rs-fMRI again  
505 exhibits properties different than the other two modalities. While both dMRI and CCEP  
506 distributions skew in opposite directions (0.63 and -0.43, respectively), their strengths form  
507 unimodal log-normal distributions and thus shown with log-transformed values. In contrast, rs-  
508 fMRI connectivity values form a bimodal Gaussian-mixture distribution in linear space. The two  
509 modes were characterized by obtaining the maximum-likelihood fit (`fitgmdist`) of a 2-  
510 component Gaussian-mixture to the data, yielding a left mode ( $\mu = 0.0011$ ,  $\sigma = 8.1e-8$ ) forming  
511 63% of the distribution and a right mode ( $\mu = 0.0017$ ,  $\sigma = 8.1e-8$ ) forming 37%, respectively.  
512 Splitting the rs-fMRI modes at the midpoint between their means (0.0014) and plotting their  
513 respective connectivity matrices (fig. **9D**) reveals that the low-connectivity (left) mode consists  
514 primarily of connections between the default mode / frontoparietal networks and other regions  
515 of the cortex.

516 To further contrast the three connectivity modalities we computed six network theoretic  
517 metrics for each of the connectivity matrices: mean clustering coefficient (MCC), characteristic  
518 path length (CPL), global efficiency, gamma (normalized MCC), lambda (normalized CPL), small  
519 worldness, transitivity, and assortativity (see Appendix). Binarized network metrics were  
520 assessed after thresholding by edge weight (connectivity strength) at intervals of 0.1. Note that  
521 this lambda is unrelated to the exponential length constant reported above. To account for the  
522 order-based arbitrary treatment of equal edge weights when thresholding, the node (parcel)  
523 order was randomized 1000 times, and the mean metric values are shown. Empirical 95%  
524 confidence intervals for these means are too small to be shown at scale. Networks densities  
525 above 0.6 were not examined as the un-thresholded network density of CCEP connectivity  
526 matrix, treating missing data as non-connections, is less than 0.7. However, all measures  
527 appear to converge as binary network density approaches 1. As shown in figure 10, the MCC,  
528 CPL, global efficiency, small worldness, transitivity, and assortativity are markedly different for

529 rs-fMRI connectivity than for CCEP and probabilistic dMRI tractography, whose metrics as a  
530 function of network density are more similar to each other. Normalizing by metrics computed  
531 for a random network with the same statistical makeup changes this pattern. For gamma the  
532 rs-fMRI and CCEP networks are more similar than either is to probabilistic dMRI tractography,  
533 and lambda rs-fMRI and probabilistic dMRI tractography are more similar than either is to the  
534 CCEP network. The high MCC, transitivity, and assortativity and low global efficiency of rs-  
535 fMRI relative to the other modalities may be indicative of strong, long-range correlativity  
536 beyond that predicted by anatomical connections.

537

## 538 **Discussion**

539 In this study we compiled a whole-cortex structural connectome by applying probabilistic  
540 tractography to the diffusion MR volumes of 1065 subjects from the WU-Minn Human  
541 Connectome Project. We report a novel, complete, and high-dynamic-range connectivity  
542 matrix discretized into the 360 parcels of the HCP-MMP1.0 atlas and further arranged into 10  
543 functional networks. It is shown that connectivity strength exponentially decays with fiber tract  
544 length, that the parts of the connectome with clear homology to macaques correspond  
545 reasonably to retrograde tracer mappings in that species, that contralateral homologs are  
546 hyperconnected, and that some connections within language-implicated cortex are stronger  
547 than expected and left-lateralized. While ipsilateral connectivity generally dominates, some  
548 regions have stronger contralateral connections. Inter-individual variability is relatively high for  
549 early visual cortex, whose connectivity co-varies across hemispheres. Cortical areas tend to be  
550 more connected with areas at similar levels of the cortical hierarchy, as indexed by their  
551 estimated myelination, particularly in prefrontal areas. Lastly, it is shown that probabilistic  
552 tractography connectivity more closely resembles that of CCEPs than rs-fMRI. In sum, we

553 quantify a dMRI-based estimate of medium- to long-range anatomical cortico-cortical  
554 connectivity in a large normative sample.

555 Diffusion MR imaging and automated post-hoc tractography are powerful tools for the  
556 elucidation of cerebral connectivity. The defining advantages of these techniques are non-  
557 invasiveness and large field-of-view, enabling whole-brain mapping in humans. However, dMRI  
558 does have significant limitations when compared to histological fiber tracing, EM microscopy,  
559 or stimulation. The most obvious of these is insensitivity to whether underlying axons are  
560 anterograde or retrograde, as evidenced by the symmetry of the connectivity matrix. The  
561 anisotropic diffusion of water molecules occurs in both anterograde and retrograde directions.  
562 Thus, the true one-way connectivity between two areas could be anywhere between none to all  
563 of the symmetric diffusion connectivity. Another important limitation is spatial resolution. While  
564 the 1.25 mm isotropic voxels achieved by the WU-Minn dMRI protocol are smaller than those  
565 of most studies (Jeurissen et al., 2019), they are still more than three orders-of-magnitude  
566 larger than the typical submicron axon diameter (Liewald et al., 2014; von Keyserlingk Graf and  
567 Schramm, 1984). This discrepancy is particularly impactful when fiber orientations are not  
568 consistent within a voxel, i.e. crossing fibers. Probabilistic diffusion tractography (Behrens et  
569 al., 2007) partially ameliorates the issue by modeling the probability distribution of orientations  
570 and accounting for uncertainty, but ultimately dMRI with current technology is a meso- to  
571 macroscale technique. Direct histological validation of dMRI techniques is uncommon, but has  
572 been performed for probabilistic tractography *in vitro* in pigs (Dyrby et al., 2007) and macaques  
573 (Donahue et al., 2016; Jbabdi et al., 2013), with the latter two studies using the same  
574 probtrackX algorithm as the current study (Behrens et al., 2007). We have extending these  
575 validations with a between-species comparison (Fig. 4).

576 Of the several families of dMRI tractography algorithms available, we selected local,  
577 probabilistic tractography (Behrens et al., 2007). The WU-Minn HCP makes available the



578 bedpostX precursor files and creating a probabilistic tractography connectome was always a  
579 stated component of the WU-Minn HCP project (Van Essen et al., 2013; Van Essen and  
580 Ugurbil, 2017). That such a connectome has not yet been released for these data may be due  
581 to the immense computational challenge of performing these analyses at the scale of the HCP.  
582 An advantage of probabilistic tractography is its sensitivity to minor, or low-probability  
583 connections. Deterministic dMRI tractography connectomes typically have low network  
584 densities, e.g. 0.18 (Mori et al., 2008) or 0.23 (Cui et al., 2019), when compared to histological  
585 fiber tracing in macaques, 0.66 (Markov et al., 2014), and this is likely a lower bound as such  
586 tracing is subject to false-negatives due to imperfect dye uptake and incomplete cortical  
587 sampling. This suggests the deterministic dMRI connectomes are missing weaker connections.  
588 On the other hand, dMRI in general and probabilistic tractography in particular has been found  
589 vulnerable to false-positive connections (Maier-Hein et al., 2017). This exchange of specificity  
590 for sensitivity (Sarwar et al., 2019; Zalesky et al., 2016) is consistent with our very high group-  
591 average network density of 1.0 and the likely presence false-positive connections, and is thus  
592 an important caveat to the data presented here. In cases where false-negative connections are  
593 less concerning than false-positive connections, such as topological analyses (Zalesky et al.,  
594 2016), subsequent users of these data may opt to threshold the connectivity matrix by either  
595 connection strength or consistency (Roberts et al., 2017), see figure 3.

596 When constructing this connectome, we divided the cortex into 180 parcels per  
597 hemisphere following the HCP-MMP1.0 atlas (Glasser et al., 2016). To ease interpretation, we  
598 further organized the parcels into 10 functional networks modified from (Ji et al., 2019). These  
599 networks were created by applying iterative Louvain clustering (Blondel et al., 2008; Rubinov  
600 and Sporns, 2010) and other criteria to HCP resting state fMRI data. While these fMRI-defined  
601 network definitions correspond reasonably to the structural connections reported here, there  
602 are exceptions. The operculum and temporoparietal junction, in particular, appears to be a

603 structurally distinct area that has been folded into several functional networks (Ji et al., 2019).  
604 However, this contiguous region forms the lateral salience network in (Barnett et al., 2020)  
605 which similarly applied a very similar methodology to a non-HCP cohort. Like many cortically-  
606 focused studies, we used a surface-based methodology to define these areas, with seed and  
607 target regions constrained to the white-matter – gray-matter interface. This approach reduces  
608 the overrepresentation of major bundles (Jeurissen et al., 2019), enables the automated  
609 assessment based on inter-subject homology (Fischl et al., 1999), facilitates comparison to  
610 other cortical datasets, and is true to the anatomical nature of the cortical ribbon.  
611 Unfortunately, the subcortex and cerebellum are omitted in this analysis, as are short-range,  
612 often unmyelinated, intra-parcel connections. While the inclusion of the thalamic radiations, in  
613 particular, is a merited future extension of this connectome, the small size of subcortical  
614 structures relative to diffusion imaging voxels, the nuclear (as opposed the sheet-like)  
615 organization of subcortical structures, and complex geometry of the subcortical white matter  
616 – gray matter interface (e.g. the internal medullary lamina of the thalamus), all render the  
617 challenges and methods for obtaining subcortical tractography substantially distinct from those  
618 of cortico-cortico tractography.

619 The HCP-MMP1.0 atlas used was selected because of its wide adoption, symmetry, and  
620 high parcel count. Furthermore, the parcels are based on multiple functional and anatomical  
621 criteria and are consistent with previous functional parcellations in human and non-human  
622 primates (Felleman and Van Essen, 1991; Glasser et al., 2016). Because the parcels are  
623 relatively small and informed by function, erroneous averaging of disparate connections, a  
624 connectomic extension of the partial volume artifact, is minimized. However, this comes at the  
625 cost of non-uniformity in both parcel area and shape. Methodologically, parcels are assembled  
626 from vertices on the tessellated cortical surface. A future vertex- or voxel-based connectome,

627 while computationally challenging, would have the distinct advantage of being readily  
628 reformulated into any arbitrary surface-based parcellation scheme.

629 We found that pairwise connectivity between cortical parcels exhibits an exponential decay  
630 rule with respect to fiber tract distance with a length constant  $\lambda$  of ~23 mm (~33 mm for  
631 callosal connections). While a tight exponential relationship between probabilistic diffusion  
632 tractography strength and fiber length has been previously reported, (Roberts et al., 2016), this  
633 study did not report the observed  $\lambda$  or release its data. Histological studies in non-human  
634 primates (Donahue et al., 2016; Markov et al., 2013; Theodoni et al., 2020) consistently show  
635 exponential connectivity decay with distance. Such a rule when combined with a roughly  
636 Gaussian distribution of interareal distances explains the observed log-normal distribution of  
637 connectivity strength (Markov et al., 2013). Histological data indicate a  $\lambda$  of about 3.33 mm for  
638 marmosets (Theodoni et al., 2020) and 5.55 mm for macaques (Markov et al., 2013). Across  
639 species, there appears to be a linear relationship between the logs of  $\lambda$  and total gray matter  
640 volume, predicting a human  $\lambda$  of 10 mm (Theodoni et al., 2020). While methodological  
641 differences between diffusion and histological tractography cannot be completely ruled out,  
642 Donahue and colleagues found similar  $\lambda$  for the two methods in macaques (Donahue et al.,  
643 2016). Our results suggest that, compared to other species, human cortical areas are  
644 exceptionally well connected relative to their cortical volume, reflected in a disproportionately  
645 long  $\lambda$ . Conservatively restricting the exponential fit to only the most consistent quintile of  
646 connections (Fig. **3D**) yields a  $\lambda$  of ~28 mm, further accentuating the proportional long-range  
647 hyperconnectivity of humans.

648 Geometric scaling strongly constrains cortico-cortical connectivity in humans. Considering  
649 primate brains increasing in diameter  $d$ , volume and number of cortical neurons increases by  
650  $d^3$ , (Ventura-Antunes et al., 2013), so arriving at a constant probability of connection between  
651 any two neurons would require  $d^6$  axons, and since they would need to be about  $d$  times as

652 long, this would require a volume proportional to  $d^7$ , or more if axonal diameter is increased to  
653 maintain a relatively constant latency of communication (Wang et al., 2008). However, the  
654 actual white matter volume is less than  $d^4$  (Zhang and Sejnowski, 2000), and consequently the  
655 probability of cortico-cortical connectivity must be highly limited in humans. The relatively long  
656  $\lambda$  in humans we report reduces even further the number of connections which can be  
657 accommodated within the available white matter volume. A consequence of fewer but longer  
658 connections would be reduced metabolic cost, inasmuch the cost of an action potential is 1/3  
659 axonal transmission (proportional to length) and 2/3 synaptic transmission (Lennie, 2003). The  
660 low firing rate of human pyramidal cells (Chan et al., 2014) would also reduce the metabolic  
661 cost of their axons. These observations are consistent with the proposal that the metabolic  
662 costs of cortico-cortical connections may help constrain their organization in the primate brain  
663 (Ercsey-Ravasz et al., 2013). Given this strong correlation of connection strength with distance,  
664 as well as the bias of tract-tracing techniques toward shorter, less geometrically complex  
665 connections (Jeurissen et al., 2019), there may be some merit in regressing out the effect of  
666 tract length when evaluating the relative connectivity of different cortical areas. However, the  
667 considerations enumerated above imply a strong evolutionary selection to place cortical  
668 parcels which require high connectivity to perform their calculations to be situated in direct  
669 physical proximity to each other. The patterns of relatively long distance connectivity identified  
670 here thus must be viewed as minor deviations from an overall strong tendency favoring local  
671 connectivity, a conceptualization consistent with the view of the cortex as a spatially  
672 embedded small world network.

673 One striking deviation from the distance-based connectivity was the left-lateralized hyper-  
674 connectivity between language areas, and specifically between posterior and anterior language  
675 areas. This connectivity presumably passes, completely or in part, through the classical  
676 language pathways (reviewed in (Dick and Tremblay, 2012)). The lateralization we observed

677 may then reflect that of the arcuate and inferior longitudinal fasciculi which connect the same  
678 structures and show significant left lateralization in humans but not macaques (Eichert et al.,  
679 2019; Panesar et al., 2018). Left-lateralization of the arcuate fasciculus develops late (Lebel and  
680 Beaulieu, 2011), and is sensitive to the presence, quality and quantity of early language  
681 experience (Cheng et al., 2019; Romeo et al., 2018). More generally, many of the connectivity  
682 patterns observed here could be the indirect result of co-activation of the connected parcels  
683 (Mount and Monje, 2017). The left-lateralized ipsilateral connectivity may be compensated by a  
684 relative lack of callosal connections from the same areas, under the hypothesis that the total  
685 connectivity is constrained.

686 A more general factor that might induce deviations from a distance-based connectivity rule  
687 may be the principle of hierarchical organization. It has been proposed that distant areas with  
688 similar laminar properties, and thus of similar hierarchical order may have privileged  
689 connections (Barbas, 2015). Across the entire cortex we find that myelination similarity explains  
690 a significant but small amount of the overall variance. However, there are regions where the  
691 influence of hierarchical position is more pronounced including the right dorsal attention and  
692 left auditory/language networks. The observed hyperconnectivity and high degree of  
693 lateralization in these regions may be a consequence of the low-latencies necessary for the  
694 functions they underly. More broadly, the effects of transmission latency constraints on  
695 neuroanatomy and conduction delay on large-scale physiological recordings are an emerging  
696 area of study in human neuroscience (Muller et al., 2018). Latency is a hybrid structural–  
697 functional property of connectivity, and might in future be quantified using the latency of  
698 cortico-cortical evoked potentials (CCEP).

699 By emphasizing the cortical connectivity matrix over the white matter bundles *per se* and  
700 organizing the matrix into the widely adopted HCP-MMP1.0 atlas (Glasser et al., 2016), the  
701 structural connectome reported here enables ready comparison to other structural, functional,

702 and hybrid connectomes. As an example, we compared the probabilistic tractography  
703 connectivity to exist resting-state fMRI (rs-fMRI) (Van Essen et al., 2013) and CCEP (Trebault et  
704 al., 2018) connectivity matrices and found that our dMRI-inferred structural connectivity better  
705 reflects CCEP probability than rs-fMRI connectivity in both linear and network-theoretic  
706 comparisons, despite the dMRI and rs-fMRI cohorts being highly overlapping. Although  
707 resting-state functional connectivity is constrained by anatomical networks and can be partially  
708 predicted by them (Honey et al., 2009), indirect connections or parallel processing of stimuli in  
709 different areas can produce correlated activity even in the absence of direct anatomical  
710 connections. One notable example of the latter may be inter-hemispheric connectivity. While  
711 we did find hyperconnectivity between inter-hemispheric homologs when compared to other  
712 callosal connections, anatomical interhemispheric connectivity on the whole is much weaker  
713 than found in rs-fMRI. CCEPs, being directed by clinical requirements, have poor inter-  
714 hemispheric sampling, but we found that even among ipsilateral connections, rs-fMRI is still  
715 less similar to CCEP than probabilistic tractography. These inter-modal connectivity  
716 comparisons are not intended to be comprehensive. The HCP cohort also includes source-  
717 localized resting-state magneto-encephalography (MEG) (Larson-Prior et al., 2013), which  
718 could be used to examine the degree to which the functional connectivity of various frequency  
719 bands corresponds to anatomical connectivity. Furthermore, neuropsychological metrics,  
720 including the NIH toolbox (Gershon et al., 2013), and genotypic data ([dbGaP phs001364.v1.p1](#))  
721 are also available for this cohort, enabling future studies of the interplay between cortical  
722 connectivity, cognition, and genetics.

723 The Human Connectome Project was a scientific undertaking of visionary scope and  
724 ambition. Its commitment to open science and accessibility of data by the public enabled this  
725 study and will continue to facilitate further studies for years to come. Emerging clinical  
726 applications of brain connectomics will be underpinned by a strong base of normative data for

727 comparison. The whole-cortex probabilistic diffusion tractography connectome reported here  
728 fulfills a key goal outlined in the project's conception and we hope it will empower yet further  
729 study of the myriad and beautiful web of connectivity that the human brain embodies.

730

731

---

### 732 **Data availability**

733 Individual and group average connectivity matrices as well as all other figure source data can  
734 be found at <https://doi.org/10.5281/zenodo.4060485>. The preprocessed HCP data using in this  
735 study was retrieved from <https://db.humanconnectome.org> and the preprocessing code used  
736 to create these files is availed at <https://github.com/Washington-University/HCPpipelines>. The  
737 source code for FSL, including probtrackx2 is available from  
738 <https://fsl.fmrib.ox.ac.uk/fsl/fslwiki/FSL>. Network theory measures were computed with the  
739 brain connectivity Matlab toolbox whose source code is available from [http://www.brain-](http://www.brain-connectivity-toolbox.net)  
740 [connectivity-toolbox.net](http://www.brain-connectivity-toolbox.net).

741

### 742 **Acknowledgements**

743 This work was supported by NIMH 1RF1MH117155-01 and 5T32MH020002-19, NINDS  
744 1R01NS109553-01A1, and ONR 00014-16-1-2415. Data were provided, in part, by the Human  
745 Connectome Project, WU-Minn Consortium (Principal Investigators: David Van Essen and  
746 Kamil Ugurbil; 1U54MH091657) funded by the 16 NIH Institutes and Centers that support the  
747 NIH Blueprint for Neuroscience Research; and by the McDonnell Center for Systems  
748 Neuroscience at Washington University. Data were provided, in part, by the Functional Brain  
749 Tractography Project, funded by the European Research council. We thank Adam Niese and  
750 the San Diego Supercomputer Center for providing technical support.

751

752

## 753 **References**

- 754 Andersson JLR, Sotiropoulos SN. 2016. An integrated approach to correction for off-resonance  
755 effects and subject movement in diffusion MR imaging. *Neuroimage*.  
756 doi:10.1016/j.neuroimage.2015.10.019
- 757 Barbas H. 2015. General Cortical and Special Prefrontal Connections: Principles from Structure  
758 to Function. *Annu Rev Neurosci* **38**:269–289. doi:10.1146/annurev-neuro-071714-033936
- 759 Barnett AJ, Reilly W, Dimsdale-zucker H, Mizrak E, Reagh Z, Barnett AJ. 2020. Organization of  
760 cortico-hippocampal networks in the human brain 1–30.
- 761 Behrens TEJ, Berg HJ, Jbabdi S, Rushworth MFS, Woolrich MW. 2007. Probabilistic diffusion  
762 tractography with multiple fibre orientations: What can we gain? *Neuroimage* **34**:144–155.  
763 doi:10.1016/j.neuroimage.2006.09.018
- 764 Blondel VD, Guillaume JL, Lambiotte R, Lefebvre E. 2008. Fast unfolding of communities in  
765 large networks. *J Stat Mech Theory Exp*. doi:10.1088/1742-5468/2008/10/P10008
- 766 Burns S. 2014. A Recipe for Cortical Tractography Using FreeSurfer Labels.  
767 <http://sburns.org/2014/05/03/cortical-tractography-recipe.html>
- 768 Burt JB, Demirtaş M, Eckner WJ, Navejar NM, Ji JL, Martin WJ, Bernacchia A, Anticevic A,  
769 Murray JD. 2018. Hierarchy of transcriptomic specialization across human cortex  
770 captured by structural neuroimaging topography. *Nat Neurosci* **21**. doi:10.1038/s41593-  
771 018-0195-0
- 772 Chan AM, Dykstra AR, Jayaram V, Leonard MK, Travis KE, Gygi B, Baker JM, Eskandar E,  
773 Hochberg LR, Halgren E, Cash SS. 2014. Speech-specific tuning of neurons in human  
774 superior temporal gyrus. *Cereb Cortex* **24**:2679–2693. doi:10.1093/cercor/bht127
- 775 Cheng Q, Roth A, Halgren E, Mayberry RI. 2019. Effects of Early Language Deprivation on  
776 Brain Connectivity: Language Pathways in Deaf Native and Late First-Language Learners  
777 of American Sign Language. *Front Hum Neurosci* **13**:1–12. doi:10.3389/fnhum.2019.00320
- 778 Coalson T, Van Essen D, Glasser M. 2016. hcp-users FAQ #9: How do I map data between  
779 FreeSurfer and HCP?
- 780 Cui LB, Wei Y, Xi Y Bin, Griffa A, De Lange SC, Kahn RS, Yin H, Van Den Heuvel MP. 2019.  
781 Connectome-Based Patterns of First-Episode Medication-Naïve Patients with  
782 Schizophrenia. *Schizophr Bull* **45**:1291–1299. doi:10.1093/schbul/sbz014
- 783 David O, Job AS, De Palma L, Hoffmann D, Minotti L, Kahane P. 2013. Probabilistic functional  
784 tractography of the human cortex. *Neuroimage* **80**:307–317.  
785 doi:10.1016/j.neuroimage.2013.05.075
- 786 Dayan P, Abbott LF. 2001. Theoretical neuroscience: computational and mathematical  
787 modeling of neural systems.
- 788 Desikan RS, Ségonne F, Fischl B, Quinn BT, Dickerson BC, Blacker D, Buckner RL, Dale AM,  
789 Maguire RP, Hyman BT, Albert MS, Killiany RJ. 2006. An automated labeling system for  
790 subdividing the human cerebral cortex on MRI scans into gyral based regions of interest.  
791 *Neuroimage* **31**:968–980. doi:10.1016/j.neuroimage.2006.01.021
- 792 Dick AS, Tremblay P. 2012. Beyond the arcuate fasciculus: Consensus and controversy in the  
793 connectational anatomy of language. *Brain*. doi:10.1093/brain/aws222
- 794 Donahue CJ, Sotiropoulos SN, Jbabdi S, Hernandez-Fernandez M, Behrens TE, Dyrby TB,  
795 Coalson T, Kennedy H, Knoblauch K, Van Essen DC, Glasser MF. 2016. Using Diffusion  
796 Tractography to Predict Cortical Connection Strength and Distance: A Quantitative  
797 Comparison with Tracers in the Monkey. *J Neurosci* **36**:6758–6770.  
798 doi:10.1523/JNEUROSCI.0493-16.2016



- 799 Dyrby TB, Søgaard L V., Parker GJ, Alexander DC, Lind NM, Baaré WFC, Hay-Schmidt A,  
800 Eriksen N, Pakkenberg B, Paulson OB, Jelsing J. 2007. Validation of in vitro probabilistic  
801 tractography. *Neuroimage* **37**:1267–1277. doi:10.1016/j.neuroimage.2007.06.022
- 802 Eichert N, Verhagen L, Folloni D, Jbabdi S, Khrapitchev AA, Sibson NR, Mantini D, Sallet J,  
803 Mars RB. 2019. What is special about the human arcuate fasciculus? Lateralization,  
804 projections, and expansion. *Cortex*. doi:10.1016/j.cortex.2018.05.005
- 805 Ercsey-Ravasz M, Markov NT, Lamy C, VanEssen DC, Knoblauch K, Toroczkai Z, Kennedy H.  
806 2013. A Predictive Network Model of Cerebral Cortical Connectivity Based on a Distance  
807 Rule. *Neuron* **80**:184–197. doi:10.1016/j.neuron.2013.07.036
- 808 Felleman DJ, Van Essen DC. 1991. Distributed Hierarchical Processing in the Primate Cerebral  
809 Cortex. *Cereb Cortex* **1**:1–47. doi:10.1093/cercor/1.1.1
- 810 Fischl B. 2012. FreeSurfer. *Neuroimage*. doi:10.1016/j.neuroimage.2012.01.021
- 811 Fischl B, Sereno MI, Tootell RBH, Dale AM. 1999. High-resolution intersubject averaging and a  
812 coordinate system for the cortical surface. *Hum Brain Mapp* **8**:272–284.  
813 doi:10.1002/(SICI)1097-0193(1999)8:4<272::AID-HBM10>3.0.CO;2-4
- 814 Fischl B, Van Der Kouwe A, Destrieux C, Halgren E, Ségonne F, Salat DH, Busa E, Seidman LJ,  
815 Goldstein J, Kennedy D, Caviness V, Makris N, Rosen B, Dale AM. 2004. Automatically  
816 Parcellating the Human Cerebral Cortex. *Cereb Cortex* **14**:11–22.  
817 doi:10.1093/cercor/bhg087
- 818 Gershon RC, Wagster M V, Hendrie HC, Fox NA, Cook KF, Nowinski CJ. 2013. NIH toolbox for  
819 assessment of neurological and behavioral function. *Neurology* **80**:S2–S6.
- 820 Glasser MF, Coalson TS, Robinson EC, Hacker CD, Harwell J, Yacoub E, Ugurbil K, Andersson  
821 J, Beckmann CF, Jenkinson M, Smith SM, Van Essen DC. 2016. A multi-modal  
822 parcellation of human cerebral cortex. *Nature*. doi:10.1038/nature18933
- 823 Glasser MF, Van Essen DC. 2011. Mapping Human Cortical Areas In Vivo Based on Myelin  
824 Content as Revealed by T1- and T2-Weighted MRI. *J Neurosci* **31**:11597–11616.  
825 doi:10.1523/JNEUROSCI.2180-11.2011
- 826 Hagmann P, Cammoun L, Gigandet X, Meuli R, Honey CJ, Van Wedeen J, Sporns O. 2008.  
827 Mapping the structural core of human cerebral cortex. *PLoS Biol* **6**:1479–1493.  
828 doi:10.1371/journal.pbio.0060159
- 829 Honey CJ, Sporns O, Cammoun L, Gigandet X, Thiran JP, Meuli R, Hagmann P. 2009.  
830 Predicting human resting-state functional connectivity from structural connectivity. *Proc*  
831 *Natl Acad Sci U S A* **106**:2035–2040. doi:10.1073/pnas.0811168106
- 832 Humphries MD, Gurney K. 2008. Network “small-world-ness”: A quantitative method for  
833 determining canonical network equivalence. *PLoS One*. doi:10.1371/journal.pone.0002051
- 834 Jbabdi S, Lehman JF, Haber SN, Behrens TE. 2013. Human and monkey ventral prefrontal  
835 fibers use the same organizational principles to reach their targets: Tracing versus  
836 tractography. *J Neurosci* **33**:3190–3201. doi:10.1523/JNEUROSCI.2457-12.2013
- 837 Jenkinson M, Beckmann CF, Behrens TEJ, Woolrich MW, Smith SM. 2012. FSL. *Neuroimage*  
838 **62**:782–790. doi:10.1016/j.neuroimage.2011.09.015
- 839 Jeurissen B, Descoteaux M, Mori S, Leemans A. 2019. Diffusion MRI fiber tractography of the  
840 brain. *NMR Biomed* **32**:1–22. doi:10.1002/nbm.3785
- 841 Ji JL, Spronk M, Kulkarni K, Repovš G, Anticevic A, Cole MW. 2019. Mapping the human  
842 brain’s cortical-subcortical functional network organization. *Neuroimage* **185**:35–57.  
843 doi:10.1016/j.neuroimage.2018.10.006
- 844 Larson-Prior LJ, Oostenveld R, Della Penna S, Michalareas G, Prior F, Babajani-Feremi A,  
845 Schoffelen JM, Marzetti L, de Pasquale F, Di Pompeo F, Stout J, Woolrich M, Luo Q,  
846 Bucholz R, Fries P, Pizzella V, Romani GL, Corbetta M, Snyder AZ. 2013. Adding  
847 dynamics to the Human Connectome Project with MEG. *Neuroimage* **80**:190–201.

- 848 doi:10.1016/j.neuroimage.2013.05.056  
849 Latora V, Marchiori M. 2001. Efficient behavior of small-world networks. *Phys Rev Lett*.  
850 doi:10.1103/PhysRevLett.87.198701  
851 Lebel C, Beaulieu C. 2011. Longitudinal development of human brain wiring continues from  
852 childhood into adulthood. *J Neurosci* **31**:10937–10947.  
853 Lennie P. 2003. The cost of cortical computation. *Curr Biol* **13**:493–497.  
854 Liewald D, Miller R, Logothetis N, Wagner HJ, Schüz A. 2014. Distribution of axon diameters in  
855 cortical white matter: an electron-microscopic study on three human brains and a  
856 macaque. *Biol Cybern* **108**:541–557. doi:10.1007/s00422-014-0626-2  
857 Maier-Hein KH, Neher PF, Houde JC, Côté MA, Garyfallidis E, Zhong J, Chamberland M, Yeh  
858 FC, Lin YC, Ji Q, Reddick WE, Glass JO, Chen DQ, Feng Y, Gao C, Wu Y, Ma J, Renjie H,  
859 Li Q, Westin CF, Deslauriers-Gauthier S, González JOO, Paquette M, St-Jean S, Girard G,  
860 Rheault F, Sidhu J, Tax CMW, Guo F, Mesri HY, Dávid S, Froeling M, Heemskerk AM,  
861 Leemans A, Boré A, Pinsard B, Bedetti C, Desrosiers M, Brambati S, Doyon J, Sarica A,  
862 Vasta R, Cerasa A, Quattrone A, Yeatman J, Khan AR, Hodges W, Alexander S,  
863 Romascano D, Barakovic M, Auría A, Esteban O, Lemkaddem A, Thiran JP, Cetingul HE,  
864 Odry BL, Mailhe B, Nadar MS, Pizzagalli F, Prasad G, Villalon-Reina JE, Galvis J,  
865 Thompson PM, Requejo FDS, Laguna PL, Lacerda LM, Barrett R, Dell’Acqua F, Catani M,  
866 Petit L, Caruyer E, Daducci A, Dyrby TB, Holland-Letz T, Hilgetag CC, Stieltjes B,  
867 Descoteaux M. 2017. The challenge of mapping the human connectome based on  
868 diffusion tractography. *Nat Commun* **8**. doi:10.1038/s41467-017-01285-x  
869 Marcus DS, Harwell J, Olsen T, Hodge M, Glasser MF, Prior F, Jenkinson M, Laumann T,  
870 Curtiss SW, Van Essen DC. 2011. Informatics and data mining tools and strategies for the  
871 human connectome project. *Front Neuroinform* **5**:1–12. doi:10.3389/fninf.2011.00004  
872 Markov, Ercsey-Ravasz MM, Ribeiro Gomes AR, Lamy C, Magrou L, Vezoli J, Misery P,  
873 Falchier A, Quilodran R, Gariel MA. 2014. A weighted and directed interareal connectivity  
874 matrix for macaque cerebral cortex. *Cereb cortex* **24**:17–36.  
875 Markov NT, Ercsey-Ravasz M, Van Essen DC, Knoblauch K, Toroczkai Z, Kennedy H. 2013.  
876 Cortical High-Density Counterstream Architectures. *Science (80- )* **342**:1238406–1238406.  
877 doi:10.1126/science.1238406  
878 Mori S, Oishi K, Jiang H, Jiang L, Li X, Akhter K, Hua K, Faria A V., Mahmood A, Woods R,  
879 Toga AW, Pike GB, Neto PR, Evans A, Zhang J, Huang H, Miller MI, van Zijl P, Mazziotta  
880 J. 2008. Stereotaxic white matter atlas based on diffusion tensor imaging in an ICBM  
881 template. *Neuroimage* **40**:570–582. doi:10.1016/j.neuroimage.2007.12.035  
882 Mount CW, Monje M. 2017. Wrapped to adapt: experience-dependent myelination. *Neuron*  
883 **95**:743–756.  
884 Muller L, Chavane F, Reynolds J, Sejnowski TJ. 2018. Cortical travelling waves: mechanisms  
885 and computational principles. *Nat Rev Neurosci*. doi:10.1038/nrn.2018.20  
886 Newman MEJ. 2004. Fast algorithm for detecting community structure in networks. *Phys Rev E*  
887 **69**:66133.  
888 Newman MEJ. 2003. The structure and function of complex networks. *SIAM Rev*.  
889 doi:10.1137/S003614450342480  
890 Panesar SS, Yeh F-C, Jacquesson T, Hula W, Fernandez-Miranda JC. 2018. A quantitative  
891 tractography study into the connectivity, segmentation and laterality of the human inferior  
892 longitudinal fasciculus. *Front Neuroanat* **12**:47.  
893 Roberts JA, Perry A, Lord AR, Roberts G, Mitchell PB, Smith RE, Calamante F, Breakspear M.  
894 2016. The contribution of geometry to the human connectome. *Neuroimage* **124**:379–393.  
895 doi:10.1016/j.neuroimage.2015.09.009  
896 Roberts JA, Perry A, Roberts G, Mitchell PB, Breakspear M. 2017. Consistency-based

- 897 thresholding of the human connectome. *Neuroimage* **145**:118–129.  
898 doi:10.1016/j.neuroimage.2016.09.053
- 899 Romeo RR, Segaran J, Leonard JA, Robinson ST, West MR, Mackey AP, Yendiki A, Rowe ML,  
900 Gabrieli JDE. 2018. Language exposure relates to structural neural connectivity in  
901 childhood. *J Neurosci* **38**:7870–7877.
- 902 Rubinov M, Sporns O. 2010. Complex network measures of brain connectivity: Uses and  
903 interpretations. *Neuroimage*. doi:10.1016/j.neuroimage.2009.10.003
- 904 Sarwar T, Ramamohanarao K, Zalesky A. 2019. Mapping connectomes with diffusion MRI:  
905 deterministic or probabilistic tractography? *Magn Reson Med* **81**:1368–1384.  
906 doi:10.1002/mrm.27471
- 907 Sotiropoulos SN, Jbabdi S, Xu J, Andersson JL, Moeller S, Auerbach EJ, Glasser MF,  
908 Hernandez M, Sapiro G, Jenkinson M, Feinberg DA, Yacoub E, Lenglet C, Van Essen DC,  
909 Ugurbil K, Behrens TEJ. 2013. Advances in diffusion MRI acquisition and processing in  
910 the Human Connectome Project. *Neuroimage* **80**:125–143.  
911 doi:10.1016/j.neuroimage.2013.05.057
- 912 Sporns O, Tononi G, Kötter R. 2005. The human connectome: A structural description of the  
913 human brain. *PLoS Comput Biol* **1**:0245–0251. doi:10.1371/journal.pcbi.0010042
- 914 Theodoni P, Majka P, Reser DH, Wójcik DK, Rosa MGP, Wang X-J. 2020. Structural attributes  
915 and principles of the neocortical connectome in the marmoset monkey. *bioRxiv*.
- 916 Trebaul L, Deman P, Tuyisenge V, Jedynak M, Hugues E, Rudrauf D, Bhattacharjee M, Tadel F,  
917 Chanteloup-Foret B, Saubat C, Reyes Mejia GC, Adam C, Nica A, Pail M, Dubeau F,  
918 Rheims S, Trébuchon A, Wang H, Liu S, Blauwblomme T, Garcés M, De Palma L, Valentin  
919 A, Metsähonkala EL, Petrescu AM, Landré E, Szurhaj W, Hirsch E, Valton L, Rocamora R,  
920 Schulze-Bonhage A, Mindruta I, Francione S, Maillard L, Taussig D, Kahane P, David O.  
921 2018. Probabilistic functional tractography of the human cortex revisited. *Neuroimage*  
922 **181**:414–429. doi:10.1016/j.neuroimage.2018.07.039
- 923 Van Essen DC, Smith SM, Barch DM, Behrens TEJ, Yacoub E, Ugurbil K. 2013. The WU-Minn  
924 Human Connectome Project: An overview. *Neuroimage* **80**:62–79.  
925 doi:10.1016/j.neuroimage.2013.05.041
- 926 Van Essen DC, Ugurbil K. 2017. Components of the Human Connectome Project - Diffusion  
927 Tractography. [https://www.humanconnectome.org/study/hcp-young-adult/project-](https://www.humanconnectome.org/study/hcp-young-adult/project-protocol/diffusion-tractography)  
928 [protocol/diffusion-tractography](https://www.humanconnectome.org/study/hcp-young-adult/project-protocol/diffusion-tractography)
- 929 Ventura-Antunes L, Mota B, Herculano-Houzel S. 2013. Different scaling of white matter  
930 volume, cortical connectivity, and gyrification across rodent and primate brains. *Front*  
931 *Neuroanat* **7**:1–12. doi:10.3389/fnana.2013.00003
- 932 von Keyserlingk Graf D, Schramm U. 1984. Diameter of axons and thickness of myelin sheaths  
933 of the pyramidal tract fibres in the adult human medullary pyramid. *Anat Anz* **157**:97–111.
- 934 Wang SSH, Shultz JR, Burish MJ, Harrison KH, Hof PR, Towns LC, Wagers MW, Wyatt KD.  
935 2008. Functional trade-offs in white matter axonal scaling. *J Neurosci* **28**:4047–4056.  
936 doi:10.1523/JNEUROSCI.5559-05.2008
- 937 Watts DJ, Strogatz SH. 1998. Collective dynamics of ‘small-world’ networks. *Nature* **393**:440.
- 938 Yeh FC, Panesar S, Fernandes D, Meola A, Yoshino M, Fernandez-Miranda JC, Vettel JM,  
939 Verstynen T. 2018. Population-averaged atlas of the macroscale human structural  
940 connectome and its network topology. *Neuroimage* **178**:57–68.  
941 doi:10.1016/j.neuroimage.2018.05.027
- 942 Yeh FC, Verstynen TD, Wang Y, Fernández-Miranda JC, Tseng WYI. 2013. Deterministic  
943 diffusion fiber tracking improved by quantitative anisotropy. *PLoS One* **8**:1–16.  
944 doi:10.1371/journal.pone.0080713
- 945 Yendiki A, Panneck P, Srinivasan P, Stevens A, Zöllei L, Augustinack J, Wang R, Salat D,

946 Ehrlich S, Behrens T, Jbabdi S, Gollub R, Fischl B. 2011. Automated probabilistic  
947 reconstruction of white-matter pathways in health and disease using an atlas of the  
948 underlying anatomy. *Front Neuroinform* **5**:1–12. doi:10.3389/fninf.2011.00023  
949 Yoon JM, Benson NC, Forenzo D, Winawer J, Engel SA, Kay KN. 2019. Heritability of V1/V2/V3  
950 surface area in the HCP 7T Retinotopy Dataset. *J Vis* **19**:41b-41b.  
951 Zalesky A, Fornito A, Cocchi L, Gollo LL, van den Heuvel MP, Breakspear M. 2016.  
952 Connectome sensitivity or specificity: which is more important? *Neuroimage* **142**:407–420.  
953 doi:10.1016/j.neuroimage.2016.06.035  
954 Zhang K, Sejnowski TJ. 2000. A universal scaling law between gray matter and white matter of  
955 cerebral cortex. *Proc Natl Acad Sci U S A* **97**:5621–5626. doi:10.1073/pnas.090504197  
956  
957

## 958 **Legends**

959 **Figure 1.** Probabilistic diffusion tractography structural connectome of the human cortex **(A)**  
960 Group average (N = 1065) structural connectivity matrix consisting of the 360 HCP-MMPS1.0  
961 atlas parcels organized into ten functional networks. Raw streamline counts are fractionally  
962 scaled yielding the log probability  $F_{pt}$ . The white arrows highlight the diagonal which contains  
963 contralateral homologs. **(B)** The first row of the connectivity matrix, showing connection  
964 probabilities from left V1 to all other parcels, projected onto the fsaverage template cortex. **(C)**  
965 Single subject (100307) volume ray casting visualization of left V1-originating streamline  
966 probabilities within the skull-stripped T1-weighted structural MR volume. **(D)** Ten functional  
967 networks, adapted from (Ji et al., 2019), within HCP-MMPS1.0 atlas. These are indicated by  
968 red boxes in panel **A**.

969  
970 **Figure 1-1.** Comparison of normalization methods. Shown are the **(A)** connectivity matrices,  
971 **(B)** distributions of pairwise connectivity, **(C)** the pre-log distribution of  $F_{pt}$  **(D)** relationships  
972 between connectivity and fiber tract length for four normalization methods.

973  
974 **Figure 2.** . Connectivity strength exponential decays with fiber tract length. **(A)** and **(B)**  
975 connections within the right and left hemispheres, respectively. **(C)** Connections between the

976 right and left hemisphere. **(D)** All connections. Each marker represents a pair of parcels. Red  
977 traces show the least-squares exponential fit; inset are the length constant  $\lambda$  and  $r^2$  of this fit.  
978 Note that  $F_{pt}$  is log-transformed making these axes effectively semi-log.

979

980 **Figure 2-1.** Alternative models for fitting connectivity strength as a function of fiber tract  
981 length. Each gray marker shows the average pair-wise  $F_{pt}$  between two parcels and fiber tract  
982 length between them, as also shown in figure 2D. The colored traces show maximum likelihood  
983 estimates for several listed functional forms. The AIC, AICc, aBIC columns contain the Akaike,  
984 corrected Akaike, and Bayesian information criteria, respectively. While the Gaussian fits  
985 explain slightly more variance and have a slightly lower AIC than the exponential fit, the  
986 exponential has fewer parameters and is consistent with histological non-human primate  
987 evidence (Donahue et al., 2016; Markov et al., 2013; Theodoni et al., 2020).

988

989 **Figure 2-2.** Effect of motion during the dMRI scan. **(A)** Time-course of displacement relative to  
990 initial position for one subject (996782). The six runs of the HCP dMRI protocol can be seen.  
991 **(B)** Exponential fall-off coefficient  $\lambda$  is only modestly affected by motion,  $r = 0.140$ ,  $p = 4.6E-6$ .  
992 Each marker represents a subject.

993

994 **Figure 3.** Inter-individual variability. Shown are **(A)** the matrix of connectivity coefficients of  
995 variation (CV) across subjects **(B)** pairwise CV vs. fiber tract length, **(C)** the distribution of CV  
996 across all connections, **(D)** the  $F_{pt}$  vs. fiber tract length for the connections in the highest  
997 quintile of inter-individual consistency, and **(F)** the  $F_{pt}$  of right hemisphere V1 – V2 connection in  
998 all subjects vs. left hemisphere V1 – V2 connection. In panels **B** and **D** each marker represents  
999 a sample statistic for a connection between two parcels. In panel **F** each marker represents an

1000 individual subject. In panel **D** the red trace show the least-squares exponential fit and inset are  
1001 the length constant  $\lambda$  and  $r^2$  of this fit. Note that  $F_{pt}$  is log-transformed making this panel's axes  
1002 effectively semi-log. In panel F, the  $r^2$  of the least squares linear fit is reported.

1003

1004 **Figure 4.** Comparison of human diffusion tractography and macaque retrograde tracing  
1005 connectomes. Subset of homologous parcels in the human HCP-MMPS1.0 and macaque fv91  
1006 atlas. **(A)** Macaque group-average retrograde tracer derived structural connectome, gray  
1007 indicates missing data. **(B)** Human probabilistic diffusion tractography connectome. **(C)**  
1008 Pairwise correlation between macaque and human structural connectivity,  $r = 0.35$ ,  $p = 0.0013$ .

1009

1010 **Figure 5.** Interhemispheric connectivity. Differential connectivity between ipsilateral and  
1011 contralateral connectivity. Greater Ipsilateral connectivity dominates and is indicated in red.  
1012 Parcel-pairs with greater *contralateral* connectivity than ipsilateral are blue. The green cortical  
1013 patches show anatomic extent of parcel groups of notable contrast.

1014

1015 **Figure 6.** Contralateral homologs. Differential connectivity between contralateral homologous  
1016 parcels vs the mean of all other contralateral parcels. Red indicates contralateral homologous  
1017 connectivity greater than mean contralateral connectivity. Note that many language-implicated  
1018 regions have relatively weak connectivity with their contralateral homologs.

1019

1020 **Figure 6-1.** Differential connectivity between contralateral homologous parcels vs the mean of  
1021 all other contralateral parcels. Confidence intervals are Bonferroni-corrected for multiple  
1022 comparisons.

1023

1024 **Figure 7.** Language/Auditory network hyperconnectivity and left-lateralization. **(A)** Distance-  
1025 binned connectivity within the language and auditory networks compared to connectivity  
1026 between the language and auditory networks and other networks, separately for the left and  
1027 right hemispheres **(B)** The differential trace for the within- and between- connectivity in both  
1028 hemispheres. In both panels, gray patches show Bonferroni-corrected bootstrapped 95%  
1029 confidence intervals across subjects.

1030

1031 **Figure 8.** Connectivity is influenced by the cortical hierarchy. **(A, B)** Connectivity is strongly  
1032 predicted by hierarchical similarity in some networks and modestly predicted overall. **(A)** All  
1033 connectivity vs. myelination difference, including within- and across- network connections, for  
1034 the left, right, and callosal connections. For both panels, each marker represents a parcel pair.  
1035 **(B)** Within-network connectivity vs. myelination difference for 10 functional networks. Linear fits  
1036 and correlation coefficients computed independently for the left and right hemisphere. A  
1037 negative correlation indicates that parcels at similar hierarchical levels tend to be more  
1038 connected. **(C, D)** Higher order prefrontal areas are better connected. **(C)** Histogram of  
1039 correlation coefficients between areal myelination and  $F_{pt}$  connectivity to each parcel. Only  
1040 significant coefficients after Bonferroni correction are shown. Most coefficients are negative  
1041 indicating high connectivity to low-myelination (i.e., higher-order) areas. **(D)** Significant negative  
1042 coefficients (red) map onto bilateral prefrontal cortex. Only the bilateral DVT and V6A are show  
1043 positive significant correlations (blue).

1044

1045 **Figure 8-1.** Myelination difference connectivity matrix. This provides an estimate for the  
1046 difference in hierarchical level between cortical parcels. Values have been fractionally scaled.

1047 Note that the color scale has been reversed when compared to figure 1, as  $|\Delta\text{myelination}|$  is  
1048 inversely proportional to connectivity.

1049

1050 **Figure 8-2.** Pearson correlations between the  $F_{pt}$  from each left hemisphere parcel to all others  
1051 and the target parcels' myelination indices. p values are Bonferroni-corrected for multiple  
1052 comparisons.

1053

1054 **Figure 8-3.** Pearson correlations between the  $F_{pt}$  from each right hemisphere parcel to all  
1055 others and the target parcels' myelination indices. p values are Bonferroni-corrected for  
1056 multiple comparisons.

1057

1058 **Figure 9.** Probabilistic dMRI more closely resembles CCEPs than resting-state fMRI. **(A)**  
1059 Connectivity matrices for probabilistic dMRI tractography, CCEP, and rs-fMRI. For CCEPs  
1060 missing data has been colored grey and pre-log zero-strength connections black. **(B)**  
1061 Correlations among the three modalities. The least-squares linear fit is shown in red. **(C)** Non-  
1062 zero pairwise connection strength distributions. Note that rs-fMRI connectivity values, which  
1063 are not log-transformed, display two modes, separated at 0.0014. **(D)** Cortical parcels  
1064 displaying lower (left) and higher (right) modes of rs-fMRI connectivity.

1065

1066 **Figure 9-1.** Within-hemisphere comparison of probabilistic dMRI tractography, CCEP, and rs-  
1067 fMRI connectivity. For the left and right hemisphere, the distribution of pairwise non-zero  
1068 connection strengths and correlations among the three modalities are shown. The least-  
1069 squares linear fit is shown in red. All within-hemisphere findings are concordant with the overall  
1070 findings, shown in figure 9.



1071

1072 **Figure 10.** Network theoretic differences between the connectivity modalities. Binarized  
1073 network metrics after thresholding by edge weight (connectivity strength).

1074 **Table 1.** Connectome Features

1075

1076 **Table 2.** Parcel order and network assignment. The emboldened indices refer to the parcel  
1077 order in figure 1A. The Orig. indices refer to the original parcel order presented in (Glasser et  
1078 al., 2016). All indices refer to the left hemisphere, adding 180 yields the homologous right  
1079 hemisphere indices.

1080

1081 **Table 3.** Statistics and uncertainty. Where multiple uncertainties are listed for a figure panel,  
1082 they correspond to the statistics read left-to-right, top-to-bottom in that panel. For figure 8B  
1083 only uncertainties for significant correlations are listed. Uncertainties for figures 6, 7, 8 and 10  
1084 are not shown. Figure 6-1 contains bootstrapped 95% confidence intervals for the 180 means  
1085 shown in figure 6,  $n = 179$ . Figure 7 shows Bootstrapped 95% confidence intervals in gray; the  
1086 values of these intervals for all distance bins are available in the figure source data at  
1087 <https://doi.org/10.5281/zenodo.4060485>. For figure 10 means across shuffled matrices are  
1088 only necessary to account for arbitrary ordering among tied edge weights and the  
1089 bootstrapped 95% confidence intervals for these means are vanishingly small. The values of  
1090 these intervals at all network densities are also included in the figure source data. For nonlinear  
1091 regressions confidence intervals are estimated using  $R^{-1}$ , the inverse  $R$  factor from  $QR$   
1092 decomposition of the Jacobian, the degrees of freedom for error, and the root mean squared  
1093 error. For linear correlations the confidence intervals are based on an asymptotic normal  
1094 distribution of  $0.5 \cdot \log((1+r)/(1-r))$ , with an approximate variance equal to  $1/(N-3)$ . For descriptive

1095 statistics, e.g. means, empirical 95% confidence intervals are estimated by bootstrapping with

1096 2000 iterations.

1097

1098

1099

1100

1101

1102

1103 **Figures & Tables**

1104

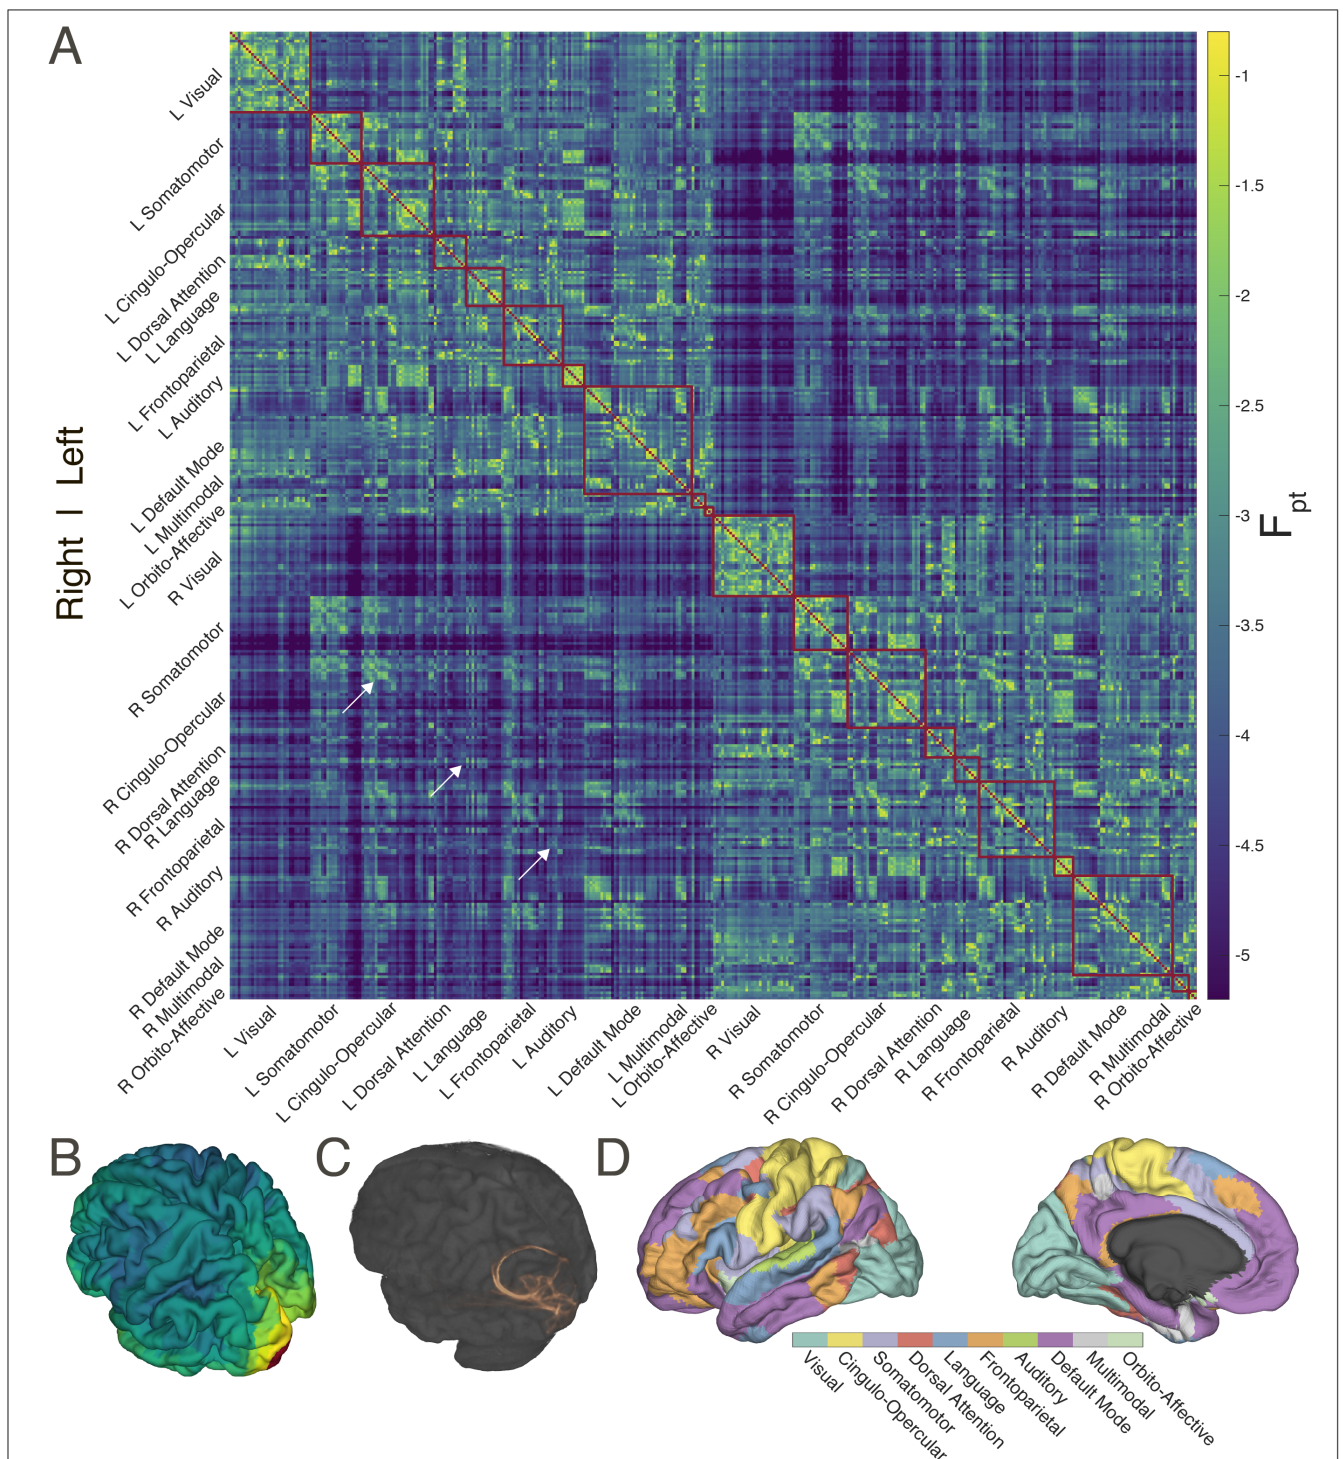

**Figure 1.** Probabilistic diffusion tractography structural connectome of the human cortex **(A)** Group average (N = 1065) structural connectivity matrix consisting of the 360 HCP-MMPS1.0 atlas parcels organized into ten functional networks. Raw streamline counts are fractionally scaled yielding the log probability  $F_{pt}$ . The white arrows highlight the diagonal which contains contralateral homologs. **(B)** The first row of the connectivity matrix, showing connection probabilities from left V1 to all other parcels, projected onto the fsaverage template cortex. **(C)** Single subject (100307) volume ray casting visualization of left V1-originating streamline probabilities within the skull-stripped T1-weighted structural MR volume. **(D)** Ten functional networks, adapted from (Ji et al., 2019), within HCP-MMPS1.0 atlas. These are indicated by red boxes in panel **A**.

1105

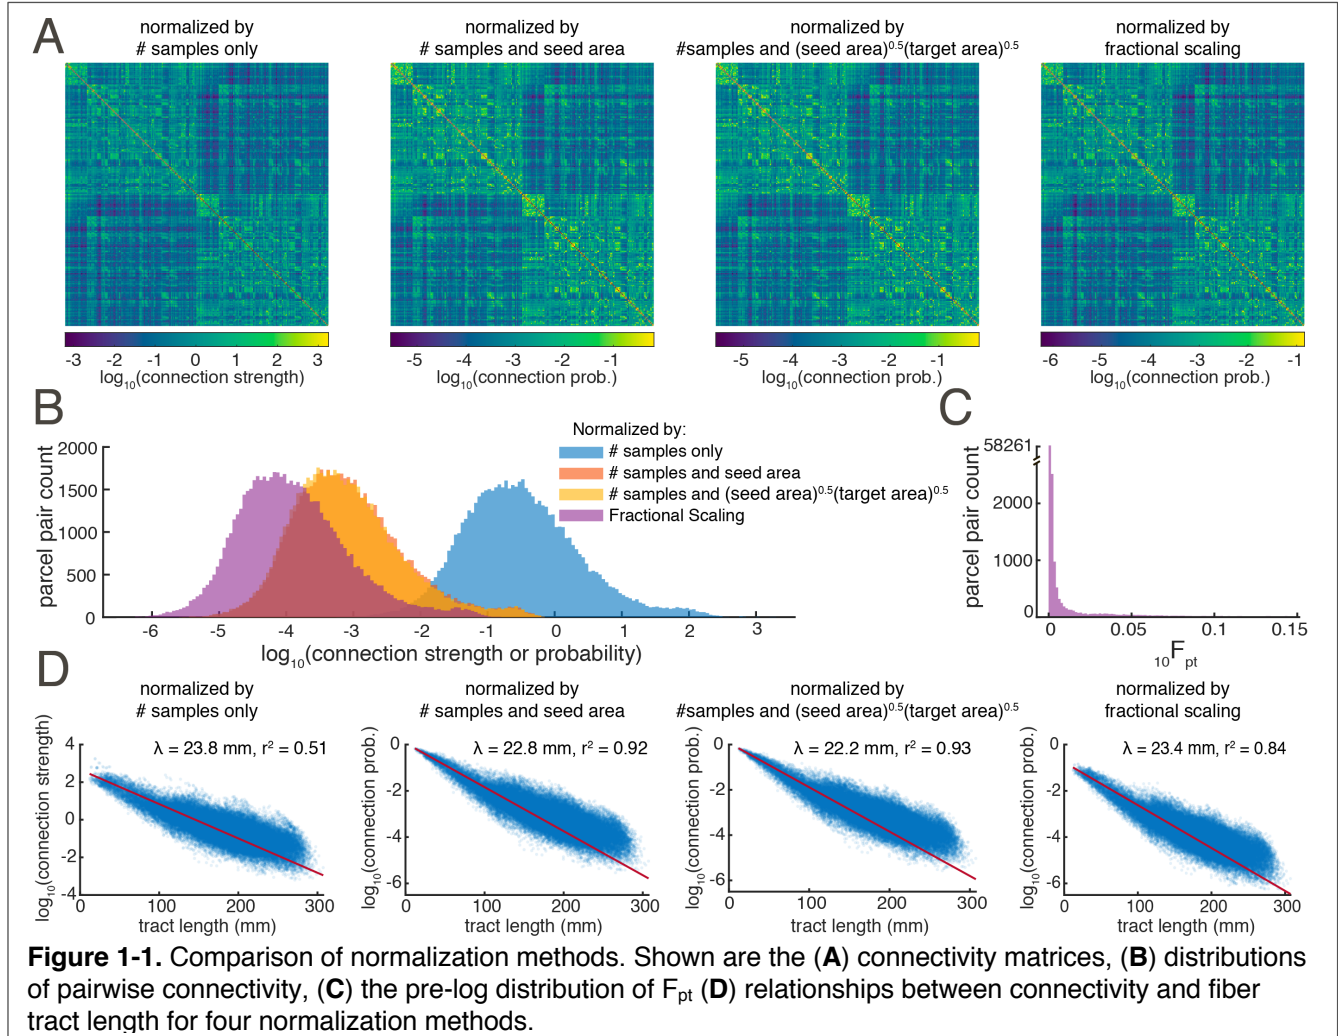

1106

1107

1108

1109

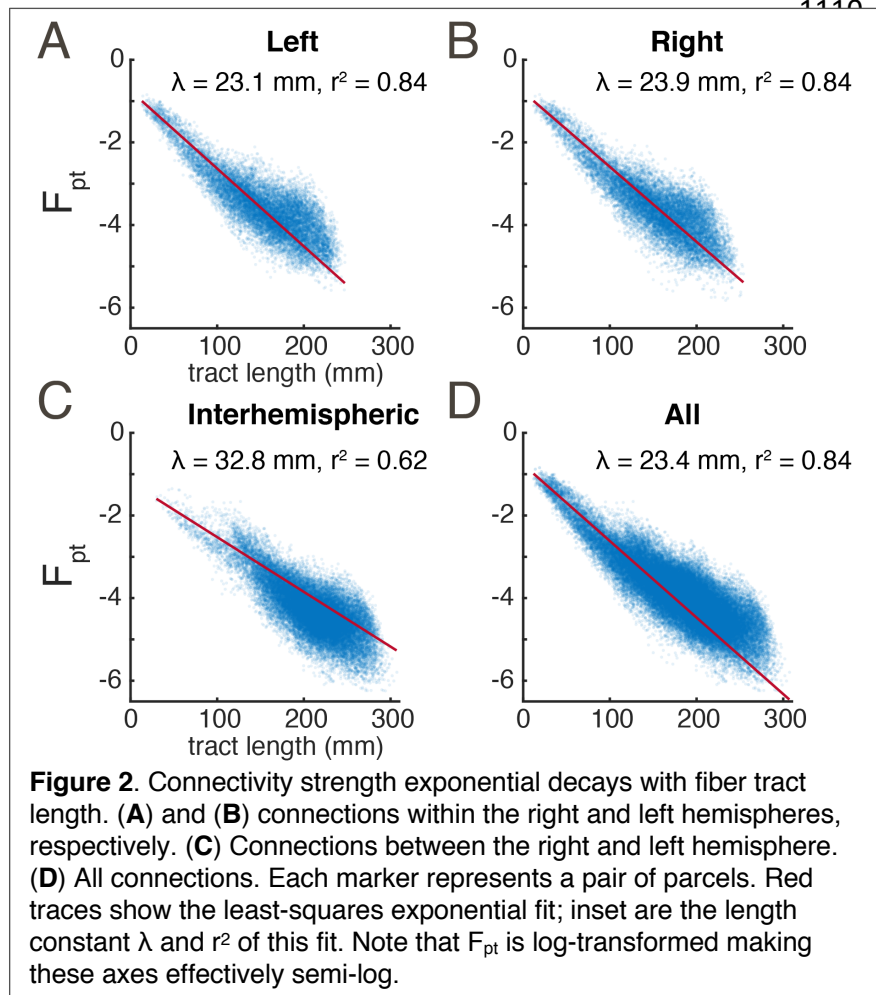

1111

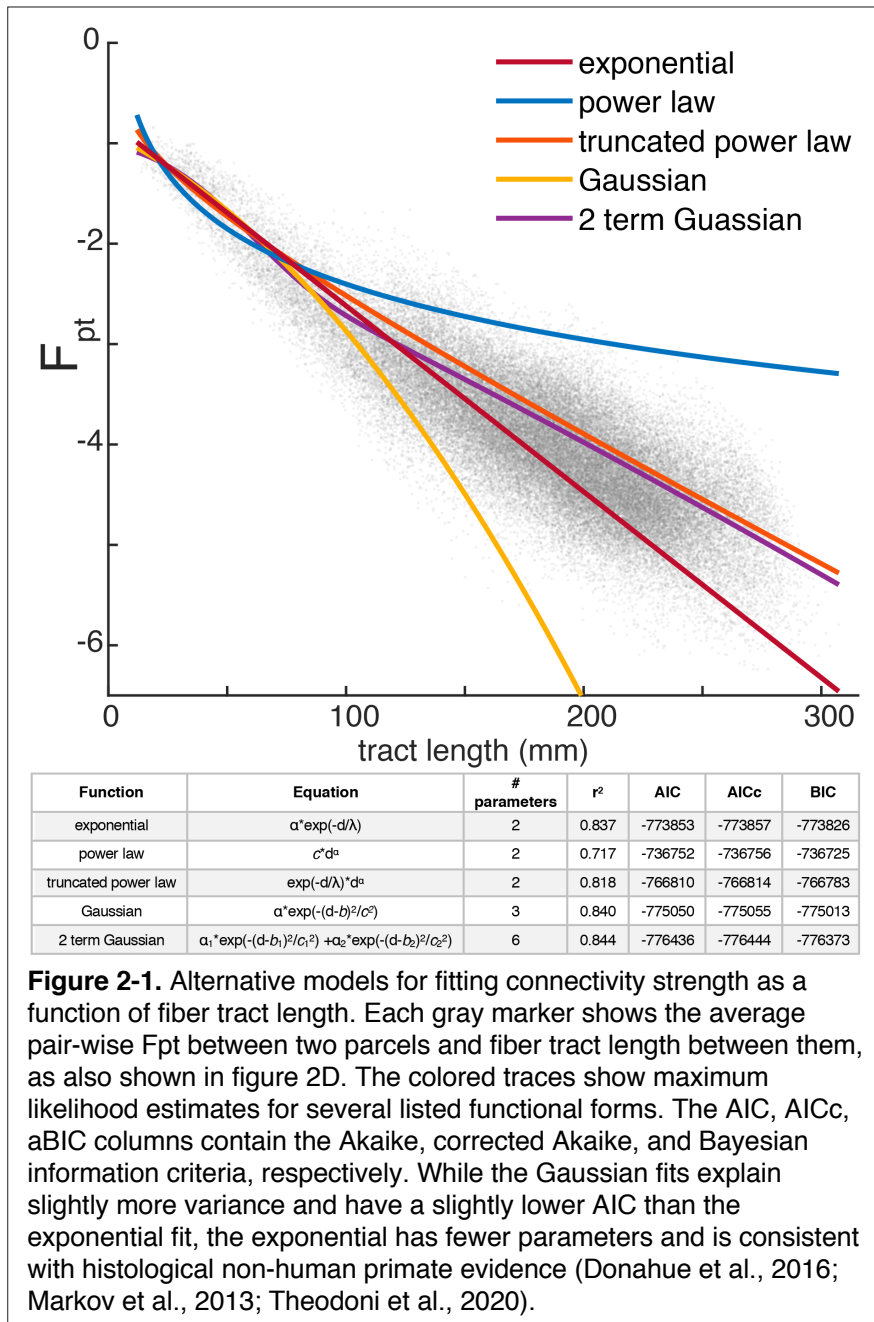

1112

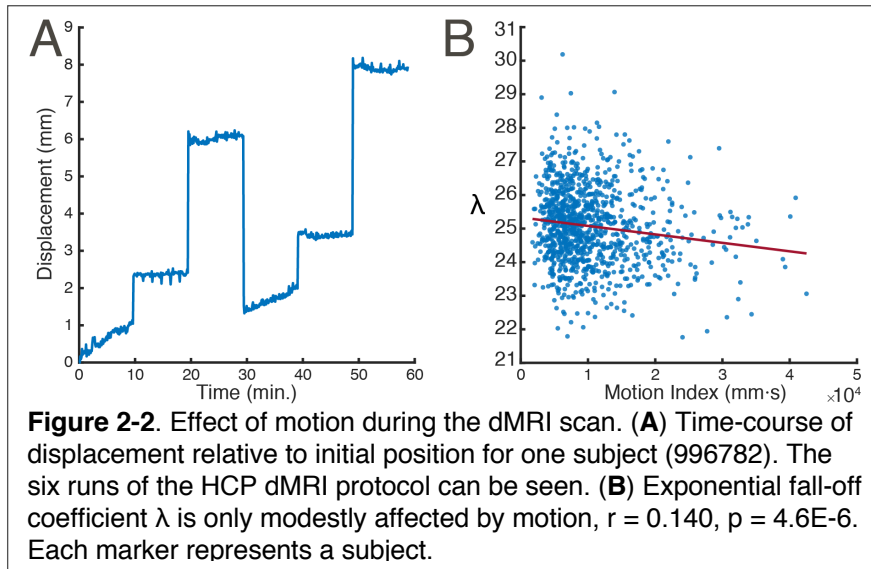

1113

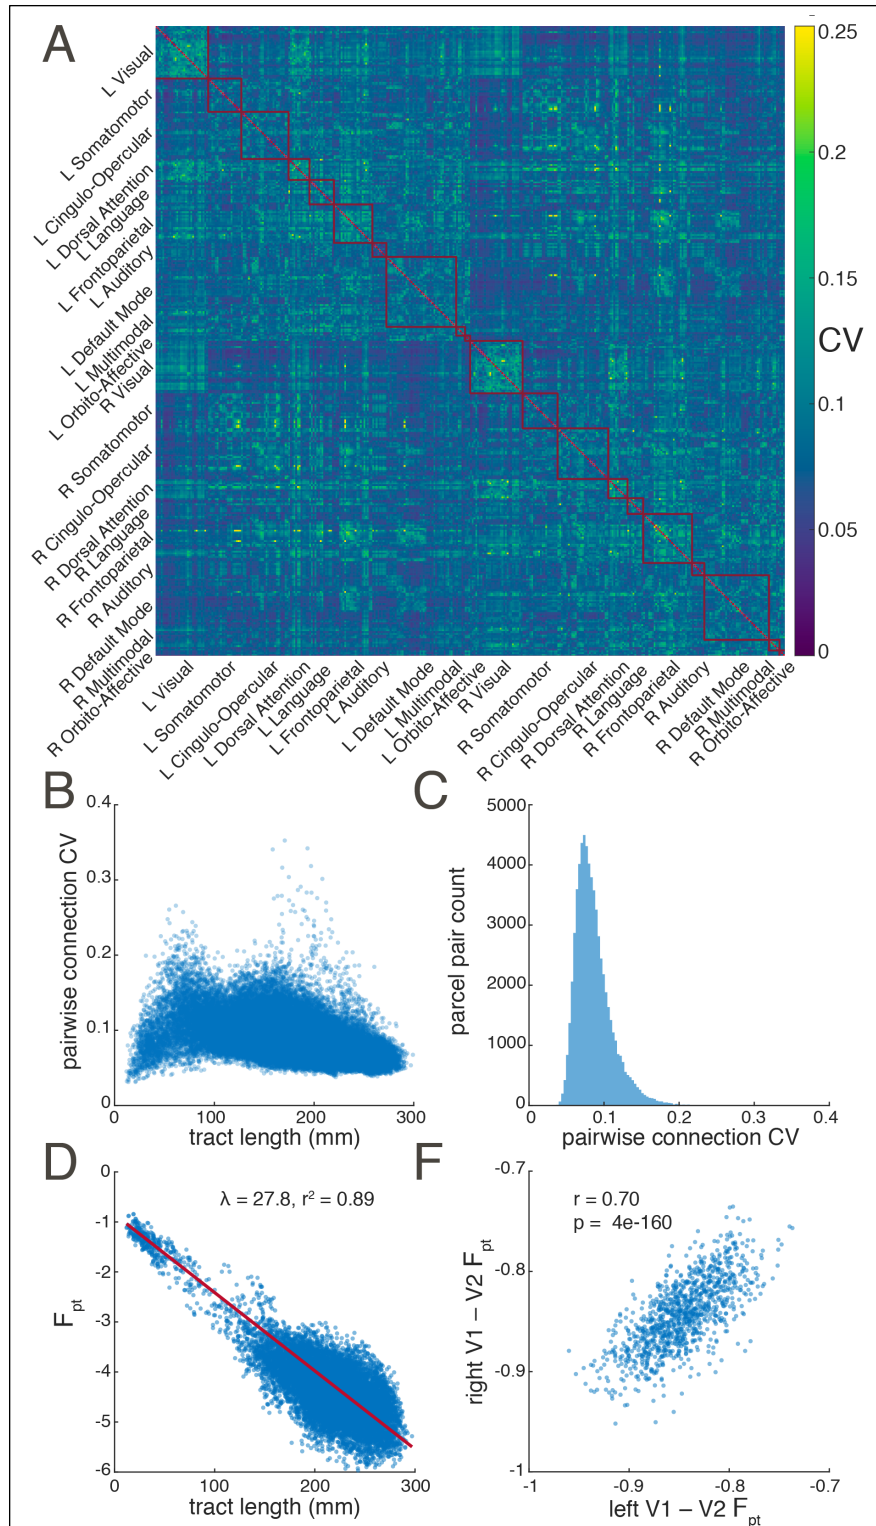

**Figure 3.** Inter-individual variability. Shown are **(A)** the matrix of connectivity coefficients of variation (CV) across subjects **(B)** pairwise CV vs. fiber tract length, **(C)** the distribution of CV across all connections, **(D)** the  $F_{pt}$  vs. fiber tract length for the connections in the highest quintile of inter-individual consistency, and **(F)** the  $F_{pt}$  of right hemisphere V1 – V2 connection in all subjects vs. left hemisphere V1 – V2 connection. In panels **B** and **D** each marker represents a sample statistic for a connection between two parcels. In panel **F** each marker represents an individual subject. In panel **D** the red trace show the least-squares exponential fit and inset are the length constant  $\lambda$  and  $r^2$  of this fit. Note that  $F_{pt}$  is log-transformed making this panel's axes effectively semi-log. In panel **F**, the  $r^2$  of the least squares linear fit is



1114

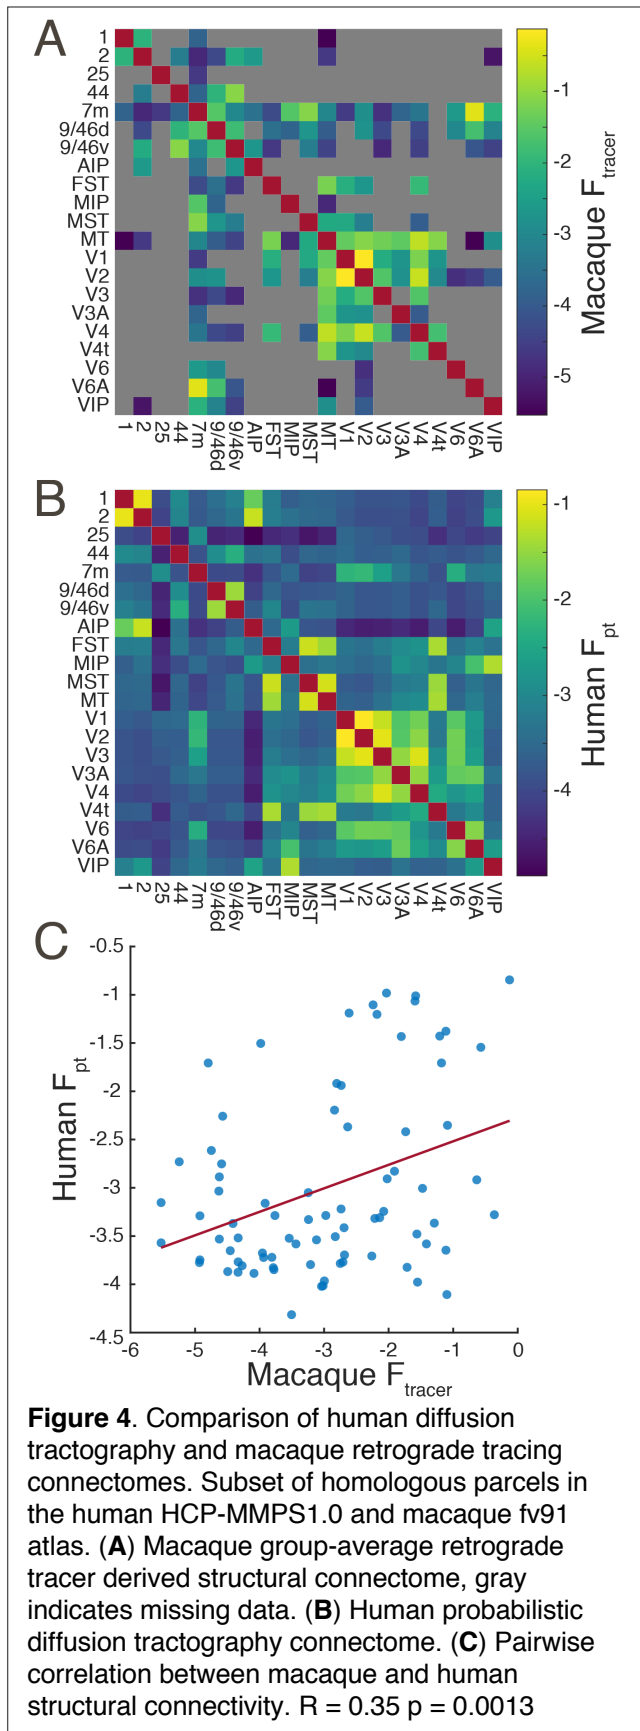

1116

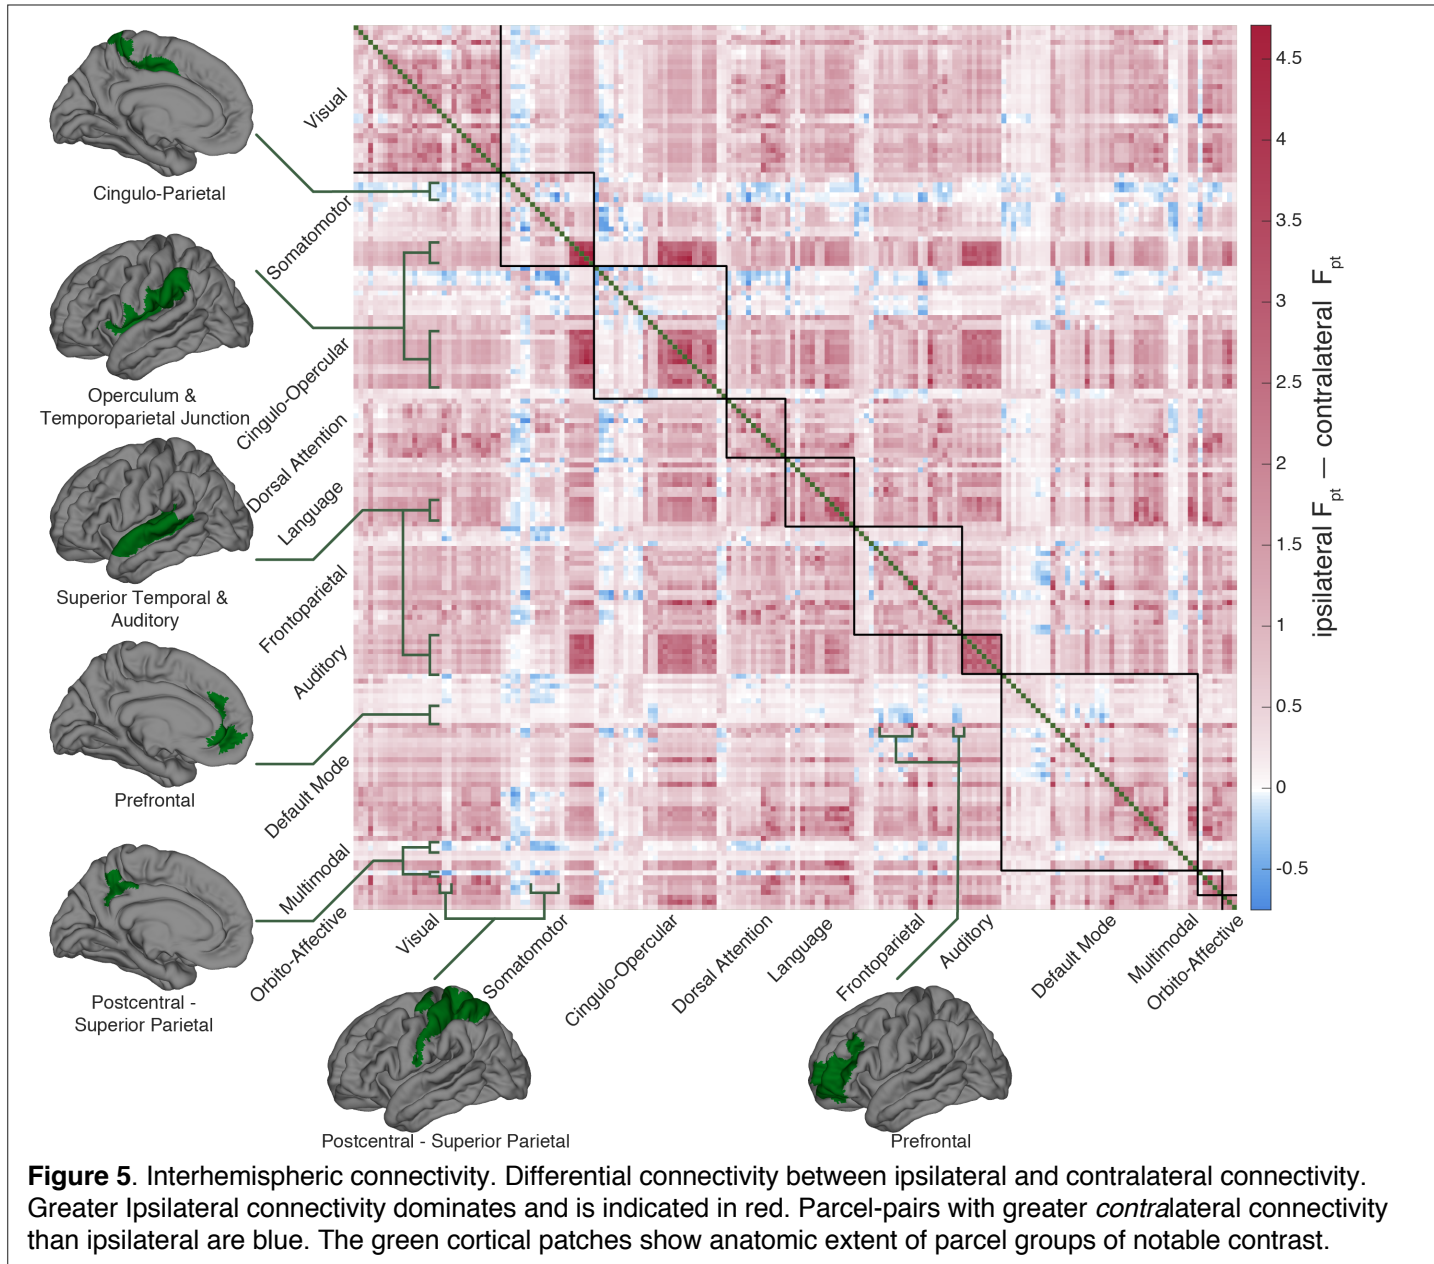

1117

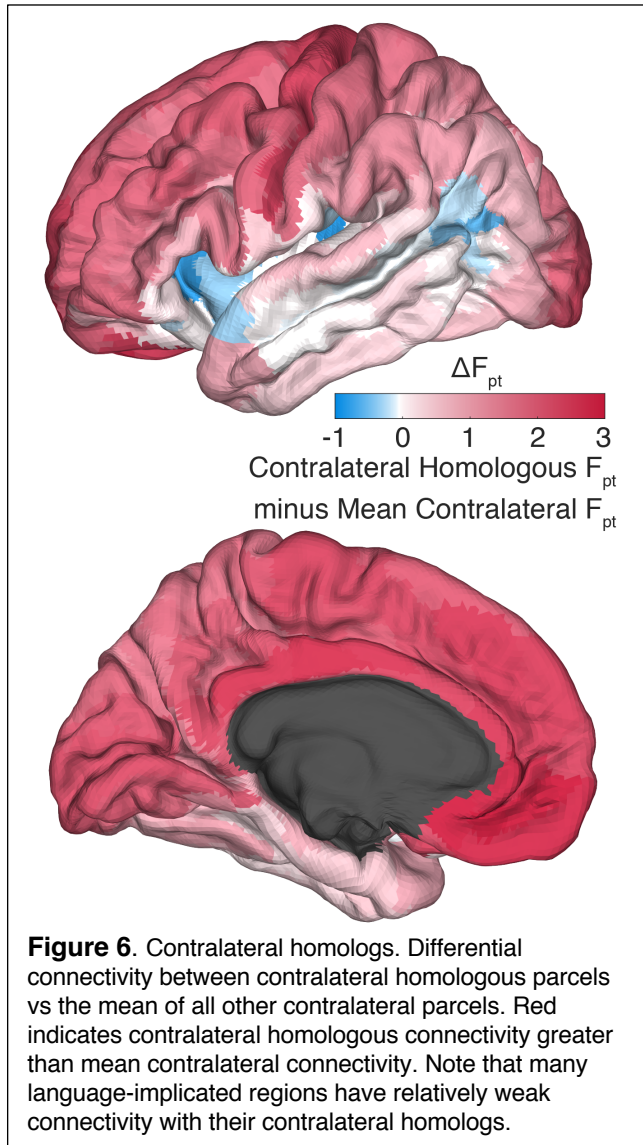

| Idx | Parcel | $F_{dt}$ to contra-lateral homolog | Mean [CI <sub>95%</sub> ] $F_{dt}$ to non-homologous contra-lateral parcels | Idx | Parcel | $F_{dt}$ to contra-lateral homolog | Mean [CI <sub>95%</sub> ] $F_{dt}$ to non-homologous contra-lateral parcels | Idx | Parcel | $F_{dt}$ to contra-lateral homolog | Mean [CI <sub>95%</sub> ] $F_{dt}$ to non-homologous contra-lateral parcels |
|-----|--------|------------------------------------|-----------------------------------------------------------------------------|-----|--------|------------------------------------|-----------------------------------------------------------------------------|-----|--------|------------------------------------|-----------------------------------------------------------------------------|
| 1   | V1     | -1.69                              | -3.72 [-3.88 -3.57]                                                         | 61  | 46     | -1.57                              | -4.15 [-4.39 -3.90]                                                         | 121 | IP1    | -2.92                              | -4.14 [-4.31 -3.99]                                                         |
| 2   | ProS   | -4.87                              | -4.71 [-4.81 -4.60]                                                         | 62  | 9-46d  | -1.66                              | -3.92 [-4.12 -3.70]                                                         | 122 | PFm    | -3.63                              | -4.09 [-4.19 -3.99]                                                         |
| 3   | DVT    | -2.49                              | -3.97 [-4.11 -3.83]                                                         | 63  | 43     | -1.38                              | -3.65 [-3.82 -3.46]                                                         | 123 | p10p   | -4.75                              | -4.51 [-4.59 -4.43]                                                         |
| 4   | MST    | -1.98                              | -3.86 [-4.01 -3.73]                                                         | 64  | PFcm   | -1.70                              | -4.23 [-4.43 -3.99]                                                         | 124 | p47r   | -3.80                              | -4.33 [-4.46 -4.19]                                                         |
| 5   | V6     | -2.31                              | -3.95 [-4.10 -3.81]                                                         | 65  | Pol2   | -1.35                              | -4.09 [-4.30 -3.87]                                                         | 125 | A1     | -4.16                              | -4.49 [-4.59 -4.38]                                                         |
| 6   | V2     | -3.18                              | -4.25 [-4.39 -4.09]                                                         | 66  | FOP4   | -5.19                              | -5.06 [-5.19 -4.91]                                                         | 126 | 52     | -4.07                              | -4.37 [-4.50 -4.24]                                                         |
| 7   | V3     | -3.90                              | -4.62 [-4.74 -4.49]                                                         | 67  | MI     | -2.18                              | -3.94 [-4.11 -3.75]                                                         | 127 | RI     | -4.26                              | -4.50 [-4.62 -4.38]                                                         |
| 8   | V4     | -1.66                              | -3.80 [-4.00 -3.61]                                                         | 68  | FOP1   | -3.14                              | -4.45 [-4.62 -4.30]                                                         | 128 | TA2    | -4.60                              | -4.62 [-4.74 -4.52]                                                         |
| 9   | V8     | -2.48                              | -3.89 [-4.04 -3.72]                                                         | 69  | FOP3   | -1.38                              | -3.60 [-3.78 -3.43]                                                         | 129 | PBelt  | -4.84                              | -4.80 [-4.92 -4.70]                                                         |
| 10  | V3A    | -2.14                              | -4.17 [-4.35 -4.00]                                                         | 70  | PFop   | -2.06                              | -3.84 [-3.99 -3.67]                                                         | 130 | MBelt  | -4.68                              | -4.67 [-4.77 -4.52]                                                         |
| 11  | V7     | -3.17                              | -4.58 [-4.74 -4.38]                                                         | 71  | PF     | -2.52                              | -4.09 [-4.23 -3.93]                                                         | 131 | LBelt  | -3.10                              | -3.91 [-4.04 -3.80]                                                         |
| 12  | IPS1   | -2.43                              | -4.14 [-4.28 -3.99]                                                         | 72  | Pol1   | -1.67                              | -3.78 [-3.93 -3.62]                                                         | 132 | A4     | -4.46                              | -4.47 [-4.60 -4.37]                                                         |
| 13  | FFC    | -2.64                              | -4.05 [-4.18 -3.89]                                                         | 73  | FOP5   | -2.67                              | -4.18 [-4.33 -4.00]                                                         | 133 | 7m     | -3.89                              | -4.21 [-4.32 -4.10]                                                         |
| 14  | V3B    | -1.88                              | -3.69 [-3.83 -3.52]                                                         | 74  | PI     | -2.93                              | -4.17 [-4.32 -4.01]                                                         | 134 | POS1   | -3.94                              | -4.29 [-4.40 -4.19]                                                         |
| 15  | LO1    | -2.11                              | -3.51 [-3.64 -3.37]                                                         | 75  | a32pr  | -3.53                              | -4.20 [-4.31 -4.08]                                                         | 135 | 23d    | -4.01                              | -4.28 [-4.41 -4.17]                                                         |
| 16  | LO2    | -3.71                              | -4.43 [-4.55 -4.32]                                                         | 76  | p24    | -4.24                              | -4.43 [-4.56 -4.30]                                                         | 136 | v23ab  | -4.25                              | -4.42 [-4.52 -4.29]                                                         |
| 17  | PIT    | -3.59                              | -4.30 [-4.43 -4.18]                                                         | 77  | PEF    | -2.49                              | -4.04 [-4.17 -3.88]                                                         | 137 | d23ab  | -4.26                              | -4.34 [-4.44 -4.24]                                                         |
| 18  | MT     | -3.83                              | -4.37 [-4.49 -4.27]                                                         | 78  | 7PL    | -2.85                              | -4.23 [-4.34 -4.08]                                                         | 138 | 31pv   | -4.08                              | -4.28 [-4.38 -4.18]                                                         |
| 19  | LIPv   | -4.33                              | -4.60 [-4.70 -4.46]                                                         | 79  | MIP    | -4.13                              | -4.86 [-5.00 -4.69]                                                         | 139 | a24    | -4.84                              | -4.80 [-4.91 -4.70]                                                         |
| 20  | VIP    | -3.77                              | -4.56 [-4.69 -4.42]                                                         | 80  | LIPd   | -4.77                              | -5.06 [-5.21 -4.91]                                                         | 140 | d32    | -5.15                              | -4.81 [-4.91 -4.70]                                                         |
| 21  | PH     | -3.62                              | -4.39 [-4.51 -4.26]                                                         | 81  | 6a     | -3.03                              | -4.41 [-4.57 -4.27]                                                         | 141 | p32    | -5.17                              | -4.71 [-4.80 -4.61]                                                         |
| 22  | V6A    | -3.72                              | -4.46 [-4.59 -4.34]                                                         | 82  | PFt    | -3.09                              | -4.31 [-4.47 -4.16]                                                         | 142 | 10r    | -2.54                              | -3.96 [-4.09 -3.80]                                                         |
| 23  | VMV1   | -4.55                              | -4.60 [-4.71 -4.50]                                                         | 83  | AIP    | -2.38                              | -4.13 [-4.31 -3.98]                                                         | 143 | 47m    | -3.55                              | -4.15 [-4.25 -4.03]                                                         |
| 24  | VMV3   | -4.69                              | -4.75 [-4.88 -4.63]                                                         | 84  | PHA3   | -2.53                              | -4.12 [-4.27 -3.95]                                                         | 144 | 8Av    | -4.12                              | -4.56 [-4.69 -4.44]                                                         |
| 25  | V4t    | -3.63                              | -4.30 [-4.42 -4.18]                                                         | 85  | TE2p   | -2.68                              | -4.13 [-4.29 -3.97]                                                         | 145 | 8Ad    | -3.30                              | -4.14 [-4.26 -4.02]                                                         |
| 26  | FST    | -1.86                              | -3.65 [-3.81 -3.49]                                                         | 86  | PHT    | -2.64                              | -4.21 [-4.34 -4.03]                                                         | 146 | 9m     | -3.76                              | -4.35 [-4.47 -4.24]                                                         |
| 27  | V3CD   | -1.75                              | -3.53 [-3.67 -3.38]                                                         | 87  | PGp    | -2.30                              | -3.98 [-4.12 -3.83]                                                         | 147 | 8BL    | -3.46                              | -4.42 [-4.54 -4.27]                                                         |
| 28  | LO3    | -4.28                              | -4.52 [-4.64 -4.40]                                                         | 88  | IP0    | -1.38                              | -3.89 [-4.06 -3.70]                                                         | 148 | 9p     | -2.89                              | -4.00 [-4.14 -3.89]                                                         |
| 29  | VMV2   | -2.00                              | -3.57 [-3.68 -3.44]                                                         | 89  | 55b    | -2.57                              | -4.18 [-4.33 -4.06]                                                         | 149 | 10d    | -3.06                              | -4.00 [-4.14 -3.89]                                                         |
| 30  | VVC    | -1.73                              | -3.58 [-3.75 -3.41]                                                         | 90  | PSL    | -2.31                              | -3.99 [-4.13 -3.82]                                                         | 150 | 47l    | -4.84                              | -4.69 [-4.81 -4.58]                                                         |
| 31  | 4      | -2.67                              | -3.96 [-4.10 -3.80]                                                         | 91  | SFL    | -3.67                              | -4.39 [-4.49 -4.27]                                                         | 151 | 9a     | -3.42                              | -4.06 [-4.16 -3.96]                                                         |
| 32  | 3b     | -1.64                              | -4.06 [-4.26 -3.87]                                                         | 92  | STV    | -4.67                              | -4.85 [-5.01 -4.72]                                                         | 152 | 10v    | -2.96                              | -4.13 [-4.25 -4.00]                                                         |
| 33  | 5m     | -1.84                              | -3.90 [-4.07 -3.72]                                                         | 93  | 44     | -1.99                              | -4.15 [-4.30 -3.92]                                                         | 153 | 10pp   | -3.53                              | -4.67 [-4.81 -4.53]                                                         |
| 34  | 5L     | -1.64                              | -3.98 [-4.17 -3.77]                                                         | 94  | 45     | -4.67                              | -4.70 [-4.82 -4.56]                                                         | 154 | OFC    | -4.15                              | -4.79 [-4.92 -4.67]                                                         |
| 35  | 24dd   | -2.12                              | -4.05 [-4.23 -3.81]                                                         | 95  | IFJa   | -4.00                              | -4.53 [-4.65 -4.42]                                                         | 155 | 47s    | -4.32                              | -4.61 [-4.73 -4.50]                                                         |
| 36  | 24dv   | -1.94                              | -3.82 [-3.98 -3.65]                                                         | 96  | IFSp   | -2.78                              | -4.24 [-4.41 -4.07]                                                         | 156 | EC     | -4.04                              | -4.49 [-4.61 -4.38]                                                         |
| 37  | 7AL    | -2.49                              | -3.85 [-3.98 -3.69]                                                         | 97  | STGa   | -2.52                              | -4.22 [-4.37 -4.04]                                                         | 157 | PreS   | -4.41                              | -4.44 [-4.55 -4.34]                                                         |
| 38  | 7PC    | -2.47                              | -3.86 [-4.04 -3.70]                                                         | 98  | A5     | -2.82                              | -4.37 [-4.54 -4.21]                                                         | 158 | H      | -3.82                              | -4.48 [-4.60 -4.33]                                                         |
| 39  | 1      | -2.02                              | -3.59 [-3.75 -3.46]                                                         | 99  | STSda  | -4.16                              | -4.62 [-4.76 -4.49]                                                         | 159 | PHA1   | -3.97                              | -4.43 [-4.56 -4.32]                                                         |
| 40  | 2      | -1.92                              | -3.90 [-4.06 -3.67]                                                         | 100 | STSdp  | -4.44                              | -4.65 [-4.76 -4.53]                                                         | 160 | STSvp  | -4.14                              | -4.75 [-4.87 -4.62]                                                         |
| 41  | 3a     | -2.40                              | -4.17 [-4.36 -3.97]                                                         | 101 | TPOJ1  | -4.95                              | -4.80 [-4.92 -4.68]                                                         | 161 | TGd    | -2.32                              | -3.85 [-4.01 -3.66]                                                         |
| 42  | 6d     | -2.06                              | -3.50 [-3.60 -3.38]                                                         | 102 | TGv    | -5.82                              | -5.08 [-5.21 -4.97]                                                         | 162 | TE1a   | -1.99                              | -3.89 [-4.07 -3.68]                                                         |
| 43  | 6mp    | -1.57                              | -3.67 [-3.84 -3.42]                                                         | 103 | RSC    | -4.49                              | -4.43 [-4.52 -4.33]                                                         | 163 | TE2a   | -3.62                              | -4.48 [-4.61 -4.37]                                                         |
| 44  | 6v     | -2.03                              | -3.82 [-3.97 -3.66]                                                         | 104 | POS2   | -4.43                              | -4.67 [-4.80 -4.54]                                                         | 164 | PGi    | -1.55                              | -4.22 [-4.41 -4.02]                                                         |
| 45  | OP4    | -1.97                              | -3.41 [-3.55 -3.27]                                                         | 105 | 7Pm    | -4.01                              | -4.48 [-4.59 -4.34]                                                         | 165 | PGs    | -1.51                              | -4.34 [-4.55 -4.07]                                                         |
| 46  | OP1    | -2.65                              | -3.76 [-3.87 -3.65]                                                         | 106 | 8BM    | -4.18                              | -4.21 [-4.33 -4.09]                                                         | 166 | PHA2   | -2.16                              | -4.17 [-4.33 -4.02]                                                         |
| 47  | OP2-3  | -2.69                              | -3.90 [-4.01 -3.78]                                                         | 107 | 8C     | -4.46                              | -4.46 [-4.57 -4.36]                                                         | 167 | 31pd   | -4.05                              | -4.16 [-4.25 -4.05]                                                         |
| 48  | FOP2   | -3.04                              | -4.07 [-4.17 -3.94]                                                         | 108 | a47r   | -4.41                              | -4.52 [-4.67 -4.39]                                                         | 168 | 31a    | -5.76                              | -5.07 [-5.17 -4.94]                                                         |
| 49  | Ig     | -2.55                              | -3.74 [-3.85 -3.64]                                                         | 109 | IFJp   | -4.91                              | -4.65 [-4.77 -4.52]                                                         | 169 | 25     | -5.26                              | -4.79 [-4.89 -4.66]                                                         |
| 50  | FEF    | -3.14                              | -4.16 [-4.26 -4.05]                                                         | 110 | IFSa   | -3.04                              | -4.09 [-4.23 -3.94]                                                         | 170 | s32    | -2.53                              | -4.13 [-4.26 -3.97]                                                         |
| 51  | 5mv    | -2.32                              | -3.83 [-3.96 -3.69]                                                         | 111 | p9-46v | -5.51                              | -4.88 [-5.00 -4.76]                                                         | 171 | STSva  | -2.92                              | -4.24 [-4.40 -4.07]                                                         |
| 52  | 23c    | -2.37                              | -3.82 [-4.00 -3.67]                                                         | 112 | a9-46v | -4.75                              | -4.48 [-4.59 -4.36]                                                         | 172 | TE1m   | -3.81                              | -4.16 [-4.25 -4.04]                                                         |
| 53  | SCEF   | -2.75                              | -4.18 [-4.31 -4.03]                                                         | 113 | a10p   | -4.71                              | -4.76 [-4.90 -4.60]                                                         | 173 | PCV    | -4.43                              | -4.49 [-4.60 -4.37]                                                         |
| 54  | 6ma    | -1.95                              | -4.03 [-4.17 -3.88]                                                         | 114 | 11l    | -5.68                              | -5.03 [-5.17 -4.88]                                                         | 174 | TPOJ2  | -4.09                              | -4.50 [-4.60 -4.37]                                                         |
| 55  | 7Am    | -1.68                              | -3.79 [-3.93 -3.64]                                                         | 115 | 13l    | -6.03                              | -5.14 [-5.26 -5.04]                                                         | 175 | TPOJ3  | -3.63                              | -4.26 [-4.36 -4.14]                                                         |
| 56  | p24pr  | -2.72                              | -4.32 [-4.49 -4.13]                                                         | 116 | i6-8   | -3.63                              | -4.61 [-4.74 -4.48]                                                         | 176 | PeEc   | -4.70                              | -4.66 [-4.77 -4.55]                                                         |
| 57  | 33pr   | -1.78                              | -4.08 [-4.26 -3.85]                                                         | 117 | s6-8   | -4.15                              | -4.68 [-4.81 -4.56]                                                         | 177 | TF     | -4.35                              | -4.48 [-4.57 -4.37]                                                         |
| 58  | a24pr  | -2.02                              | -4.11 [-4.35 -3.87]                                                         | 118 | AVI    | -3.84                              | -4.27 [-4.40 -4.15]                                                         | 178 | Pir    | -4.41                              | -4.34 [-4.43 -4.23]                                                         |
| 59  | p32pr  | -1.92                              | -4.06 [-4.27 -3.84]                                                         | 119 | TE1p   | -3.35                              | -4.09 [-4.23 -3.96]                                                         | 179 | AAIC   | -1.93                              | -4.01 [-4.19 -3.82]                                                         |
| 60  | 6r     | -1.97                              | -3.98 [-4.21 -3.76]                                                         | 120 | IP2    | -3.10                              | -4.00 [-4.11 -3.88]                                                         | 180 | pOFC   | -1.76                              | -4.03 [-4.25 -3.80]                                                         |

**Figure 6-1.** Differential connectivity between contralateral homologous parcels vs the mean of all other contralateral parcels. Confidence intervals are Bonferroni-corrected for multiple comparisons.

1119

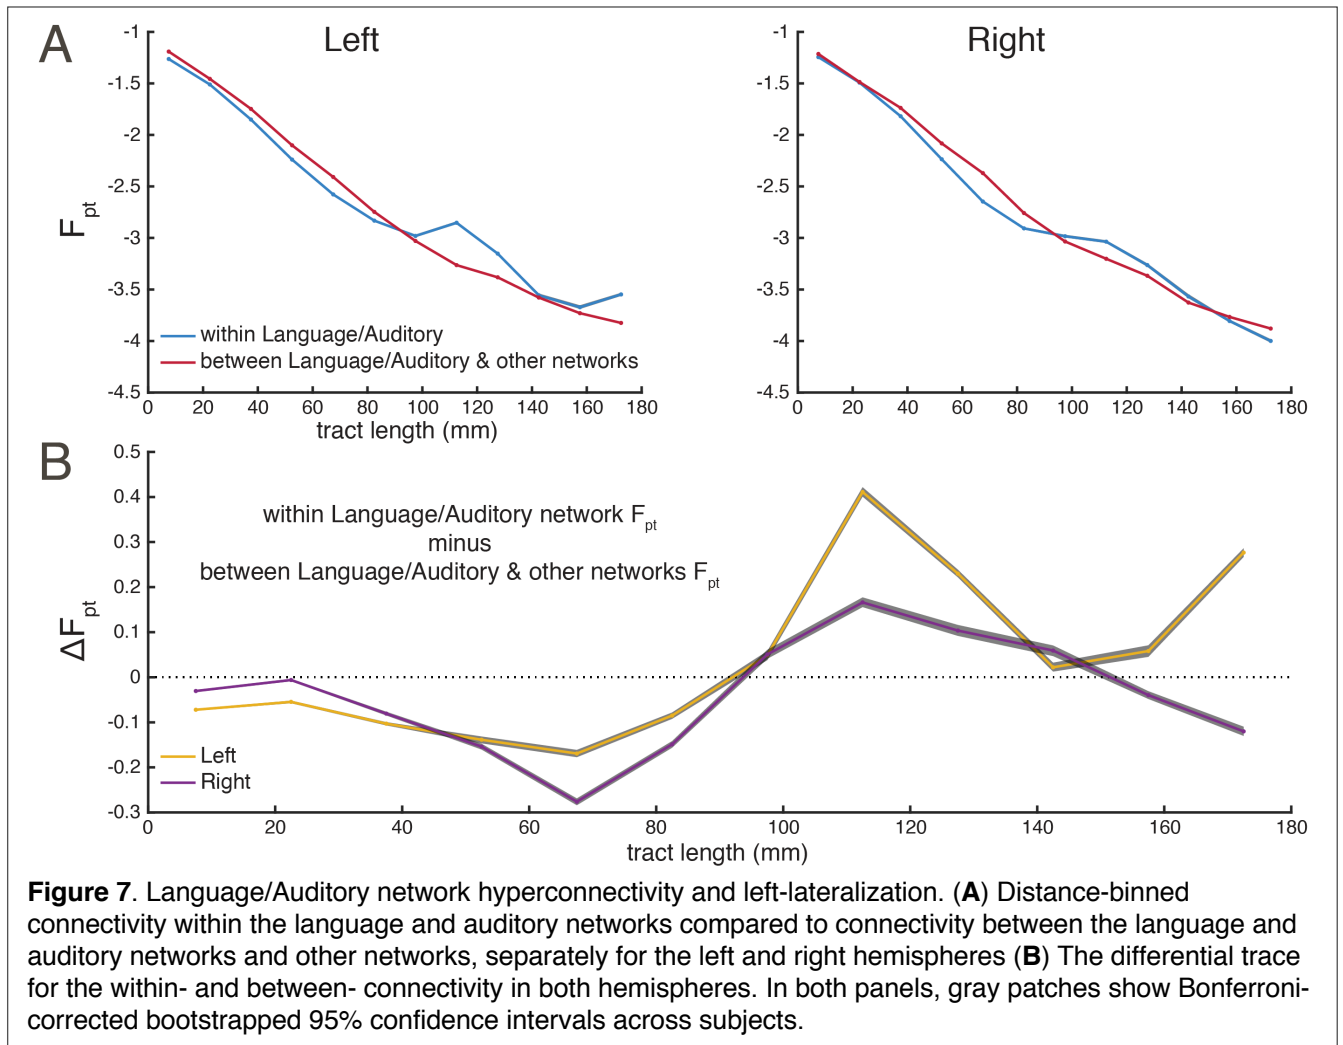

1120

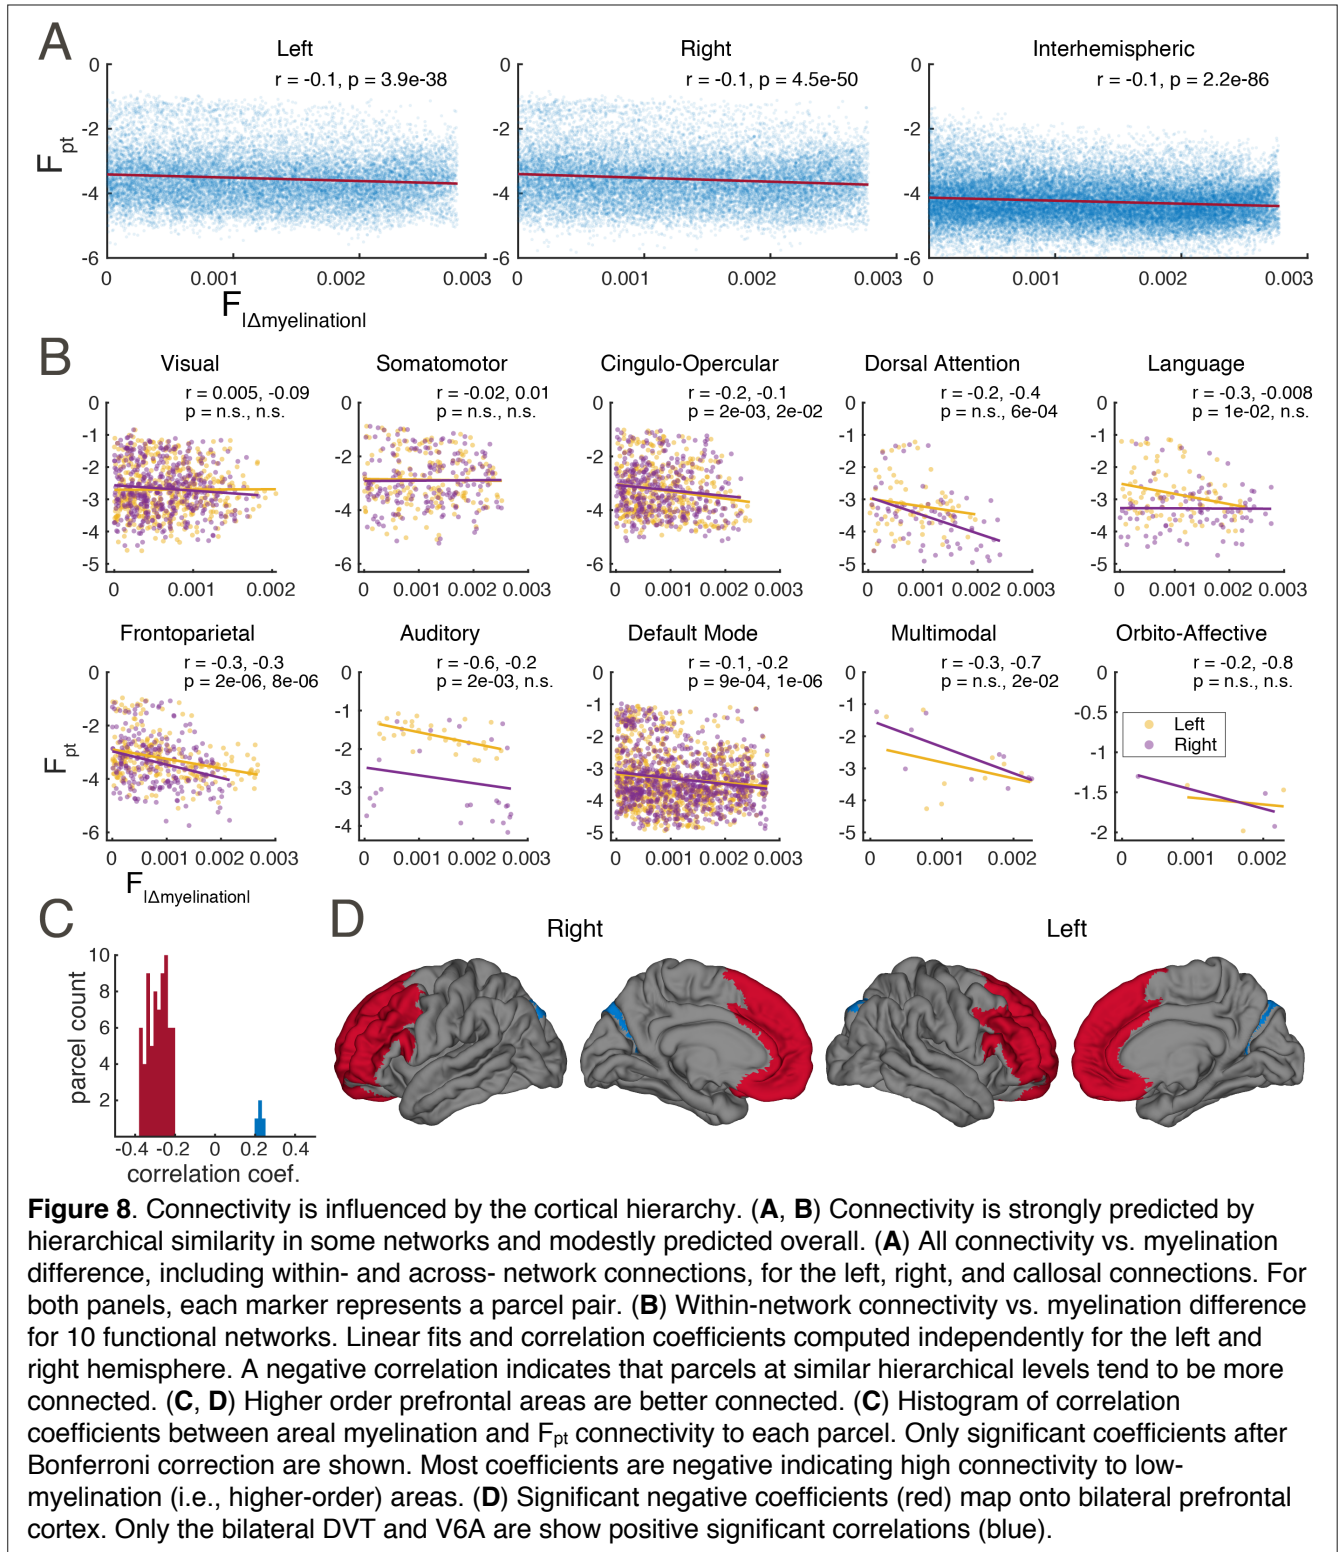

1121

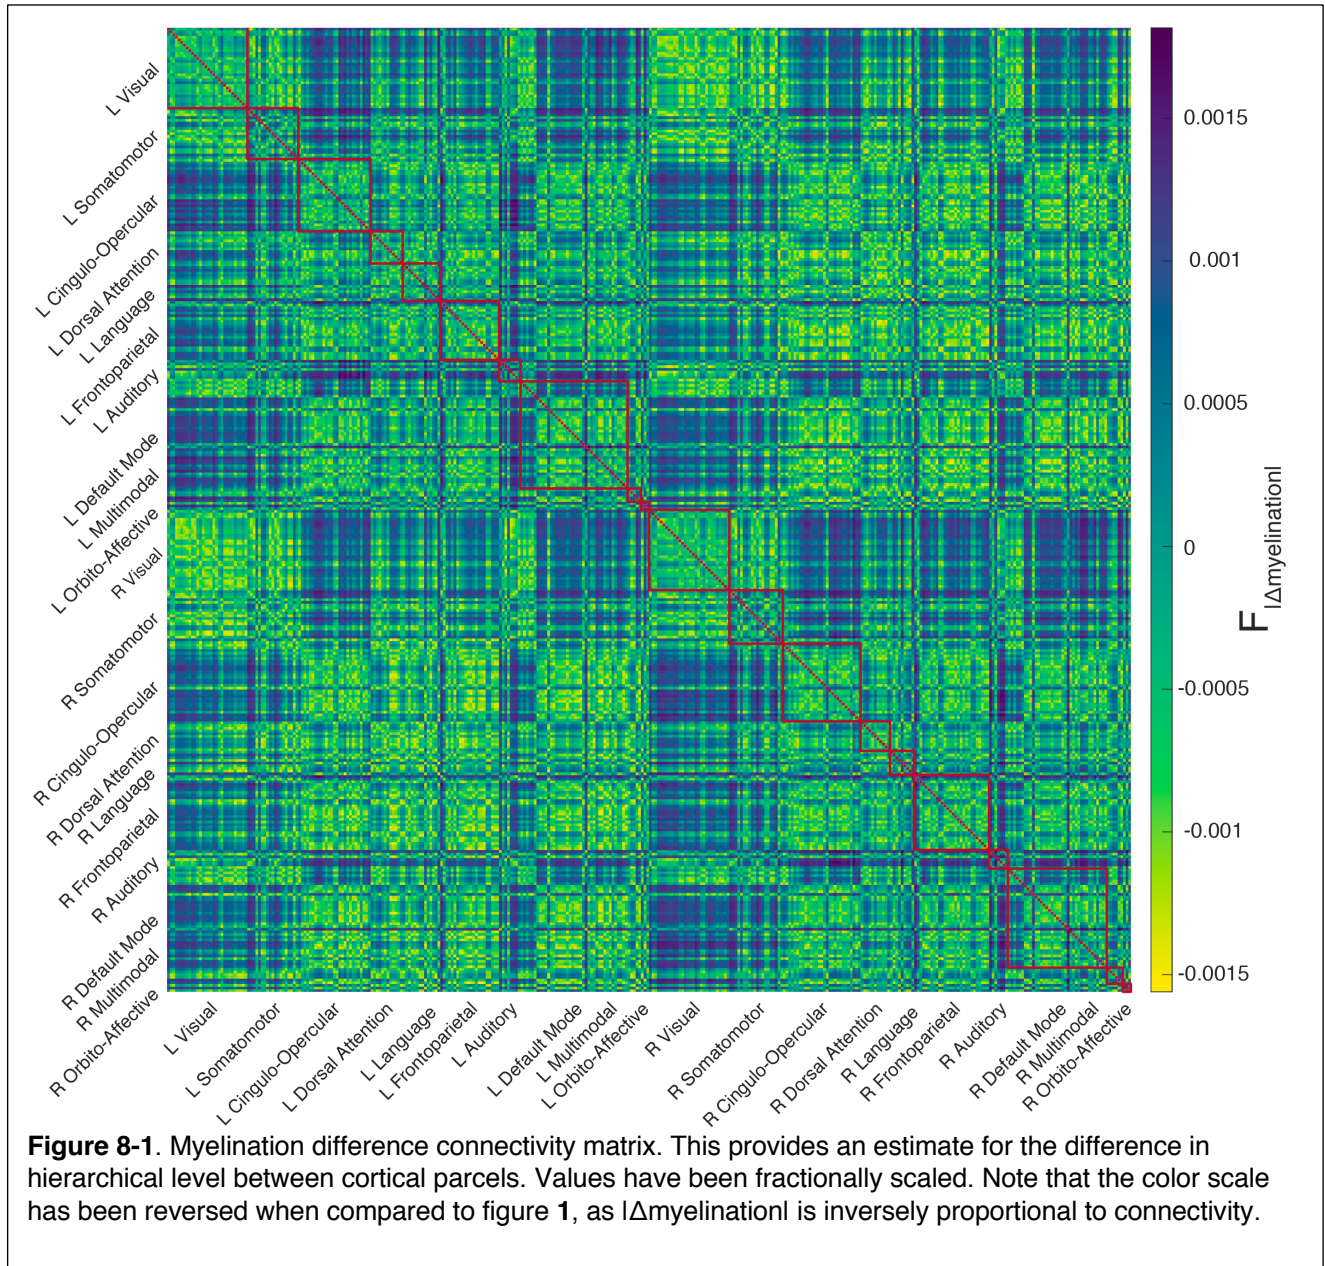

1122

| Idx. | Parcel | r     | p        | Idx. | Parcel | r     | p        | Idx. | Parcel | r     | p        |
|------|--------|-------|----------|------|--------|-------|----------|------|--------|-------|----------|
| 1    | V1     | 0.07  | n.s.     | 61   | 46     | -0.31 | 7.18E-07 | 121  | IP1    | 0.12  | n.s.     |
| 2    | ProS   | 0.15  | n.s.     | 62   | 9-46d  | -0.31 | 4.04E-07 | 122  | PFm    | 0.04  | n.s.     |
| 3    | DVT    | 0.23  | 3.99E-03 | 63   | 43     | 0.00  | n.s.     | 123  | p10p   | -0.33 | 2.77E-08 |
| 4    | MST    | 0.06  | n.s.     | 64   | PFcm   | 0.03  | n.s.     | 124  | p47r   | -0.26 | 2.51E-04 |
| 5    | V6     | 0.20  | n.s.     | 65   | Pol2   | -0.03 | n.s.     | 125  | A1     | 0.05  | n.s.     |
| 6    | V2     | 0.09  | n.s.     | 66   | FOP4   | -0.14 | n.s.     | 126  | 52     | 0.06  | n.s.     |
| 7    | V3     | 0.12  | n.s.     | 67   | MI     | -0.12 | n.s.     | 127  | RI     | 0.01  | n.s.     |
| 8    | V4     | 0.12  | n.s.     | 68   | FOP1   | -0.06 | n.s.     | 128  | TA2    | 0.05  | n.s.     |
| 9    | V8     | 0.08  | n.s.     | 69   | FOP3   | -0.10 | n.s.     | 129  | PBelt  | 0.10  | n.s.     |
| 10   | V3A    | 0.15  | n.s.     | 70   | PFop   | 0.05  | n.s.     | 130  | MBelt  | 0.08  | n.s.     |
| 11   | V7     | 0.16  | n.s.     | 71   | PF     | 0.05  | n.s.     | 131  | LBelt  | 0.07  | n.s.     |
| 12   | IPS1   | 0.17  | n.s.     | 72   | Pol1   | -0.01 | n.s.     | 132  | A4     | 0.10  | n.s.     |
| 13   | FFC    | 0.12  | n.s.     | 73   | FOP5   | -0.10 | n.s.     | 133  | 7m     | -0.05 | n.s.     |
| 14   | V3B    | 0.16  | n.s.     | 74   | PI     | -0.02 | n.s.     | 134  | POS1   | 0.07  | n.s.     |
| 15   | LO1    | 0.15  | n.s.     | 75   | a32pr  | -0.30 | 2.60E-06 | 135  | 23d    | -0.12 | n.s.     |
| 16   | LO2    | 0.12  | n.s.     | 76   | p24    | -0.27 | 6.33E-05 | 136  | v23ab  | -0.08 | n.s.     |
| 17   | PIT    | 0.12  | n.s.     | 77   | PEF    | -0.16 | n.s.     | 137  | d23ab  | -0.10 | n.s.     |
| 18   | MT     | 0.05  | n.s.     | 78   | 7PL    | 0.13  | n.s.     | 138  | 31pv   | -0.13 | n.s.     |
| 19   | LIPv   | 0.06  | n.s.     | 79   | MIP    | 0.14  | n.s.     | 139  | a24    | -0.31 | 1.12E-06 |
| 20   | VIP    | 0.08  | n.s.     | 80   | LIPd   | 0.08  | n.s.     | 140  | d32    | -0.34 | 1.23E-08 |
| 21   | PH     | 0.10  | n.s.     | 81   | 6a     | -0.11 | n.s.     | 141  | p32    | -0.35 | 4.09E-09 |
| 22   | V6A    | 0.20  | 4.92E-02 | 82   | PFt    | 0.07  | n.s.     | 142  | 10r    | -0.36 | 4.05E-10 |
| 23   | VMV1   | 0.09  | n.s.     | 83   | AIP    | 0.07  | n.s.     | 143  | 47m    | -0.16 | n.s.     |
| 24   | VMV3   | 0.08  | n.s.     | 84   | PHA3   | 0.11  | n.s.     | 144  | 8Av    | -0.21 | 2.27E-02 |
| 25   | V4t    | 0.09  | n.s.     | 85   | TE2p   | 0.08  | n.s.     | 145  | 8Ad    | -0.30 | 3.27E-06 |
| 26   | FST    | 0.08  | n.s.     | 86   | PHT    | 0.03  | n.s.     | 146  | 9m     | -0.38 | 4.11E-11 |
| 27   | V3CD   | 0.17  | n.s.     | 87   | PGp    | 0.13  | n.s.     | 147  | 8BL    | -0.35 | 2.80E-09 |
| 28   | LO3    | 0.11  | n.s.     | 88   | IP0    | 0.17  | n.s.     | 148  | 9p     | -0.33 | 4.18E-08 |
| 29   | VMV2   | 0.06  | n.s.     | 89   | 55b    | -0.10 | n.s.     | 149  | 10d    | -0.37 | 1.90E-10 |
| 30   | VVC    | 0.13  | n.s.     | 90   | PSL    | 0.03  | n.s.     | 150  | 47l    | -0.15 | n.s.     |
| 31   | 4      | 0.02  | n.s.     | 91   | SFL    | -0.29 | 1.00E-05 | 151  | 9a     | -0.33 | 3.62E-08 |
| 32   | 3b     | 0.04  | n.s.     | 92   | STV    | 0.03  | n.s.     | 152  | 10v    | -0.34 | 2.60E-08 |
| 33   | 5m     | 0.01  | n.s.     | 93   | 44     | -0.21 | 2.25E-02 | 153  | 10pp   | -0.26 | 3.45E-04 |
| 34   | 5L     | 0.04  | n.s.     | 94   | 45     | -0.18 | n.s.     | 154  | OFC    | -0.28 | 3.28E-05 |
| 35   | 24dd   | -0.09 | n.s.     | 95   | IFJa   | -0.17 | n.s.     | 155  | 47s    | -0.19 | n.s.     |
| 36   | 24dv   | -0.16 | n.s.     | 96   | IFSp   | -0.24 | 1.01E-03 | 156  | EC     | 0.02  | n.s.     |
| 37   | 7AL    | 0.04  | n.s.     | 97   | STGa   | -0.03 | n.s.     | 157  | PreS   | 0.01  | n.s.     |
| 38   | 7PC    | 0.06  | n.s.     | 98   | A5     | 0.07  | n.s.     | 158  | H      | 0.06  | n.s.     |
| 39   | 1      | 0.06  | n.s.     | 99   | STSda  | 0.04  | n.s.     | 159  | PHA1   | 0.07  | n.s.     |
| 40   | 2      | 0.06  | n.s.     | 100  | STSdp  | -0.01 | n.s.     | 160  | STSvp  | -0.04 | n.s.     |
| 41   | 3a     | 0.05  | n.s.     | 101  | TPOJ1  | 0.00  | n.s.     | 161  | TGd    | -0.11 | n.s.     |
| 42   | 6d     | -0.05 | n.s.     | 102  | TGv    | -0.03 | n.s.     | 162  | TE1a   | -0.04 | n.s.     |
| 43   | 6mp    | -0.03 | n.s.     | 103  | RSC    | -0.03 | n.s.     | 163  | TE2a   | -0.02 | n.s.     |
| 44   | 6v     | -0.09 | n.s.     | 104  | POS2   | 0.11  | n.s.     | 164  | PGi    | 0.01  | n.s.     |
| 45   | OP4    | 0.06  | n.s.     | 105  | 7Pm    | 0.00  | n.s.     | 165  | PGs    | 0.06  | n.s.     |
| 46   | OP1    | 0.03  | n.s.     | 106  | 8BM    | -0.37 | 1.14E-10 | 166  | PHA2   | 0.08  | n.s.     |
| 47   | OP2-3  | -0.01 | n.s.     | 107  | 8C     | -0.22 | 1.25E-02 | 167  | 31pd   | -0.13 | n.s.     |
| 48   | FOP2   | -0.06 | n.s.     | 108  | a47r   | -0.25 | 4.75E-04 | 168  | 31a    | -0.09 | n.s.     |
| 49   | Ig     | -0.02 | n.s.     | 109  | IFJp   | -0.17 | n.s.     | 169  | 25     | -0.27 | 9.02E-05 |
| 50   | FEF    | -0.07 | n.s.     | 110  | IFSa   | -0.25 | 3.91E-04 | 170  | s32    | -0.34 | 2.28E-08 |
| 51   | 5mv    | -0.07 | n.s.     | 111  | p9-46v | -0.28 | 2.50E-05 | 171  | STSva  | 0.02  | n.s.     |
| 52   | 23c    | -0.12 | n.s.     | 112  | a9-46v | -0.30 | 1.33E-06 | 172  | TE1m   | -0.05 | n.s.     |
| 53   | SCEF   | -0.20 | n.s.     | 113  | a10p   | -0.30 | 2.32E-06 | 173  | PCV    | -0.07 | n.s.     |
| 54   | 6ma    | -0.13 | n.s.     | 114  | 11l    | -0.18 | n.s.     | 174  | TPOJ2  | 0.02  | n.s.     |
| 55   | 7Am    | 0.01  | n.s.     | 115  | 13l    | -0.19 | n.s.     | 175  | TPOJ3  | 0.04  | n.s.     |
| 56   | p24pr  | -0.18 | n.s.     | 116  | i6-8   | -0.16 | n.s.     | 176  | PeEc   | 0.02  | n.s.     |
| 57   | 33pr   | -0.18 | n.s.     | 117  | s6-8   | -0.27 | 5.76E-05 | 177  | TF     | 0.08  | n.s.     |
| 58   | a24pr  | -0.26 | 2.99E-04 | 118  | AVI    | -0.13 | n.s.     | 178  | Pir    | -0.16 | n.s.     |
| 59   | p32pr  | -0.26 | 1.58E-04 | 119  | TE1p   | 0.01  | n.s.     | 179  | AAIC   | -0.18 | n.s.     |
| 60   | 6r     | -0.14 | n.s.     | 120  | IP2    | 0.06  | n.s.     | 180  | pOFC   | -0.24 | 1.58E-03 |

**Figure 8-2.** Pearson correlations between the  $F_{pt}$  from each left hemisphere parcel to all others and the target parcels' myelination indices. p values are Bonferroni-corrected for multiple comparisons.



1123

| Idx. | Parcel  | r     | p        | Idx. | Parcel   | r     | p        | Idx. | Parcel  | r     | p        |
|------|---------|-------|----------|------|----------|-------|----------|------|---------|-------|----------|
| 181  | R_V1    | 0.08  | n.s.     | 241  | R_46     | -0.29 | 1.20E-05 | 301  | R_IP1   | 0.13  | n.s.     |
| 182  | R_ProS  | 0.12  | n.s.     | 242  | R_9-46d  | -0.29 | 7.49E-06 | 302  | R_PFM   | 0.02  | n.s.     |
| 183  | R_DVT   | 0.23  | 2.52E-03 | 243  | R_43     | 0.00  | n.s.     | 303  | R_p10p  | -0.30 | 2.07E-06 |
| 184  | R_MST   | 0.11  | n.s.     | 244  | R_PFCm   | 0.05  | n.s.     | 304  | R_p47r  | -0.21 | 1.69E-02 |
| 185  | R_V6    | 0.20  | n.s.     | 245  | R_PoI2   | 0.03  | n.s.     | 305  | R_A1    | 0.06  | n.s.     |
| 186  | R_V2    | 0.10  | n.s.     | 246  | R_FOP4   | -0.12 | n.s.     | 306  | R_52    | 0.12  | n.s.     |
| 187  | R_V3    | 0.13  | n.s.     | 247  | R_MI     | -0.08 | n.s.     | 307  | R_RI    | 0.03  | n.s.     |
| 188  | R_V4    | 0.14  | n.s.     | 248  | R_FOP1   | -0.07 | n.s.     | 308  | R_TA2   | 0.09  | n.s.     |
| 189  | R_V8    | 0.09  | n.s.     | 249  | R_FOP3   | -0.08 | n.s.     | 309  | R_PBelt | 0.12  | n.s.     |
| 190  | R_V3A   | 0.18  | n.s.     | 250  | R_PFOp   | 0.07  | n.s.     | 310  | R_MBelt | 0.09  | n.s.     |
| 191  | R_V7    | 0.19  | n.s.     | 251  | R_PF     | 0.05  | n.s.     | 311  | R_LBelt | 0.08  | n.s.     |
| 192  | R_IPS1  | 0.20  | n.s.     | 252  | R_PoI1   | 0.09  | n.s.     | 312  | R_A4    | 0.15  | n.s.     |
| 193  | R_FFC   | 0.15  | n.s.     | 253  | R_FOP5   | -0.05 | n.s.     | 313  | R_7m    | -0.05 | n.s.     |
| 194  | R_V3B   | 0.18  | n.s.     | 254  | R_PI     | 0.08  | n.s.     | 314  | R_POS1  | 0.06  | n.s.     |
| 195  | R_LO1   | 0.19  | n.s.     | 255  | R_a32pr  | -0.29 | 6.54E-06 | 315  | R_23d   | -0.10 | n.s.     |
| 196  | R_LO2   | 0.17  | n.s.     | 256  | R_p24    | -0.27 | 9.60E-05 | 316  | R_v23ab | -0.08 | n.s.     |
| 197  | R_PIT   | 0.15  | n.s.     | 257  | R_PEF    | -0.15 | n.s.     | 317  | R_d23ab | -0.10 | n.s.     |
| 198  | R_MT    | 0.11  | n.s.     | 258  | R_7PL    | 0.16  | n.s.     | 318  | R_31pv  | -0.11 | n.s.     |
| 199  | R_LIPv  | 0.09  | n.s.     | 259  | R_MIP    | 0.17  | n.s.     | 319  | R_a24   | -0.28 | 3.54E-05 |
| 200  | R_VIP   | 0.11  | n.s.     | 260  | R_LIPd   | 0.08  | n.s.     | 320  | R_d32   | -0.32 | 2.51E-07 |
| 201  | R_PH    | 0.15  | n.s.     | 261  | R_6a     | -0.08 | n.s.     | 321  | R_p32   | -0.35 | 5.11E-09 |
| 202  | R_V6A   | 0.23  | 4.12E-03 | 262  | R_PFT    | 0.07  | n.s.     | 322  | R_10r   | -0.37 | 1.63E-10 |
| 203  | R_VMV1  | 0.11  | n.s.     | 263  | R_AIP    | 0.05  | n.s.     | 323  | R_47m   | -0.07 | n.s.     |
| 204  | R_VMV3  | 0.10  | n.s.     | 264  | R_PHA3   | 0.12  | n.s.     | 324  | R_8Av   | -0.20 | n.s.     |
| 205  | R_V4t   | 0.14  | n.s.     | 265  | R_TE2p   | 0.12  | n.s.     | 325  | R_8Ad   | -0.26 | 1.58E-04 |
| 206  | R_FST   | 0.14  | n.s.     | 266  | R_PHT    | 0.09  | n.s.     | 326  | R_9m    | -0.37 | 2.04E-10 |
| 207  | R_V3CD  | 0.19  | n.s.     | 267  | R_PGp    | 0.16  | n.s.     | 327  | R_8BL   | -0.35 | 1.95E-09 |
| 208  | R_LO3   | 0.17  | n.s.     | 268  | R_IP0    | 0.20  | n.s.     | 328  | R_9p    | -0.31 | 8.63E-07 |
| 209  | R_VMV2  | 0.08  | n.s.     | 269  | R_55b    | -0.08 | n.s.     | 329  | R_10d   | -0.36 | 3.48E-10 |
| 210  | R_VVC   | 0.14  | n.s.     | 270  | R_PSL    | 0.05  | n.s.     | 330  | R_47l   | -0.07 | n.s.     |
| 211  | R_4     | 0.04  | n.s.     | 271  | R_SFL    | -0.22 | 1.06E-02 | 331  | R_9a    | -0.30 | 1.63E-06 |
| 212  | R_3b    | 0.06  | n.s.     | 272  | R_STV    | 0.04  | n.s.     | 332  | R_10v   | -0.34 | 1.05E-08 |
| 213  | R_5m    | 0.04  | n.s.     | 273  | R_44     | -0.20 | n.s.     | 333  | R_10pp  | -0.24 | 9.97E-04 |
| 214  | R_5L    | 0.06  | n.s.     | 274  | R_45     | -0.12 | n.s.     | 334  | R_OFC   | -0.24 | 1.10E-03 |
| 215  | R_24dd  | -0.06 | n.s.     | 275  | R_IFJa   | -0.18 | n.s.     | 335  | R_47s   | -0.07 | n.s.     |
| 216  | R_24dv  | -0.15 | n.s.     | 276  | R_IFSp   | -0.24 | 1.75E-03 | 336  | R_EC    | 0.03  | n.s.     |
| 217  | R_7AL   | 0.07  | n.s.     | 277  | R_STGa   | 0.03  | n.s.     | 337  | R_PreS  | 0.01  | n.s.     |
| 218  | R_7PC   | 0.07  | n.s.     | 278  | R_A5     | 0.11  | n.s.     | 338  | R_H     | 0.07  | n.s.     |
| 219  | R_1     | 0.07  | n.s.     | 279  | R_STSda  | 0.09  | n.s.     | 339  | R_PHA1  | 0.09  | n.s.     |
| 220  | R_2     | 0.07  | n.s.     | 280  | R_STSdp  | 0.04  | n.s.     | 340  | R_STSvp | 0.03  | n.s.     |
| 221  | R_3a    | 0.07  | n.s.     | 281  | R_TPOJ1  | 0.03  | n.s.     | 341  | R_TGd   | -0.07 | n.s.     |
| 222  | R_6d    | -0.03 | n.s.     | 282  | R_TGv    | 0.03  | n.s.     | 342  | R_TE1a  | 0.01  | n.s.     |
| 223  | R_6mp   | -0.01 | n.s.     | 283  | R_RSC    | -0.05 | n.s.     | 343  | R_TE2a  | 0.02  | n.s.     |
| 224  | R_6v    | -0.08 | n.s.     | 284  | R_POS2   | 0.12  | n.s.     | 344  | R_PGi   | 0.03  | n.s.     |
| 225  | R_OP4   | 0.07  | n.s.     | 285  | R_7Pm    | 0.03  | n.s.     | 345  | R_PGs   | 0.08  | n.s.     |
| 226  | R_OP1   | 0.04  | n.s.     | 286  | R_8BM    | -0.35 | 1.71E-09 | 346  | R_PHA2  | 0.08  | n.s.     |
| 227  | R_OP2-3 | 0.00  | n.s.     | 287  | R_8C     | -0.21 | 1.51E-02 | 347  | R_31pd  | -0.12 | n.s.     |
| 228  | R_FOP2  | -0.05 | n.s.     | 288  | R_a47r   | -0.23 | 3.49E-03 | 348  | R_31a   | -0.09 | n.s.     |
| 229  | R_Ig    | 0.00  | n.s.     | 289  | R_IFJp   | -0.15 | n.s.     | 349  | R_25    | -0.24 | 1.61E-03 |
| 230  | R_FEF   | -0.05 | n.s.     | 290  | R_IFSa   | -0.21 | 3.22E-02 | 350  | R_s32   | -0.32 | 1.37E-07 |
| 231  | R_5mv   | -0.04 | n.s.     | 291  | R_p9-46v | -0.27 | 8.34E-05 | 351  | R_STSva | 0.08  | n.s.     |
| 232  | R_23c   | -0.09 | n.s.     | 292  | R_a9-46v | -0.28 | 2.20E-05 | 352  | R_TE1m  | 0.02  | n.s.     |
| 233  | R_SCEF  | -0.16 | n.s.     | 293  | R_a10p   | -0.25 | 8.16E-04 | 353  | R_PCV   | -0.05 | n.s.     |
| 234  | R_6ma   | -0.08 | n.s.     | 294  | R_11l    | -0.13 | n.s.     | 354  | R_TPOJ2 | 0.06  | n.s.     |
| 235  | R_7Am   | 0.04  | n.s.     | 295  | R_13l    | -0.11 | n.s.     | 355  | R_TPOJ3 | 0.08  | n.s.     |
| 236  | R_p24pr | -0.17 | n.s.     | 296  | R_i6-8   | -0.13 | n.s.     | 356  | R_PeEc  | 0.04  | n.s.     |
| 237  | R_33pr  | -0.18 | n.s.     | 297  | R_s6-8   | -0.22 | 9.03E-03 | 357  | R_TF    | 0.13  | n.s.     |
| 238  | R_a24pr | -0.26 | 2.39E-04 | 298  | R_AVI    | -0.03 | n.s.     | 358  | R_Pir   | -0.11 | n.s.     |
| 239  | R_p32pr | -0.25 | 4.93E-04 | 299  | R_TE1p   | 0.07  | n.s.     | 359  | R_AAIC  | -0.09 | n.s.     |
| 240  | R_6r    | -0.14 | n.s.     | 300  | R_IP2    | 0.03  | n.s.     | 360  | R_pOFC  | -0.20 | 3.99E-02 |

**Figure 8-3.** Pearson correlations between the  $F_{pt}$  from each right hemisphere parcel to all others and the target parcels' myelination indices. p values are Bonferroni-corrected for multiple comparisons.

1124

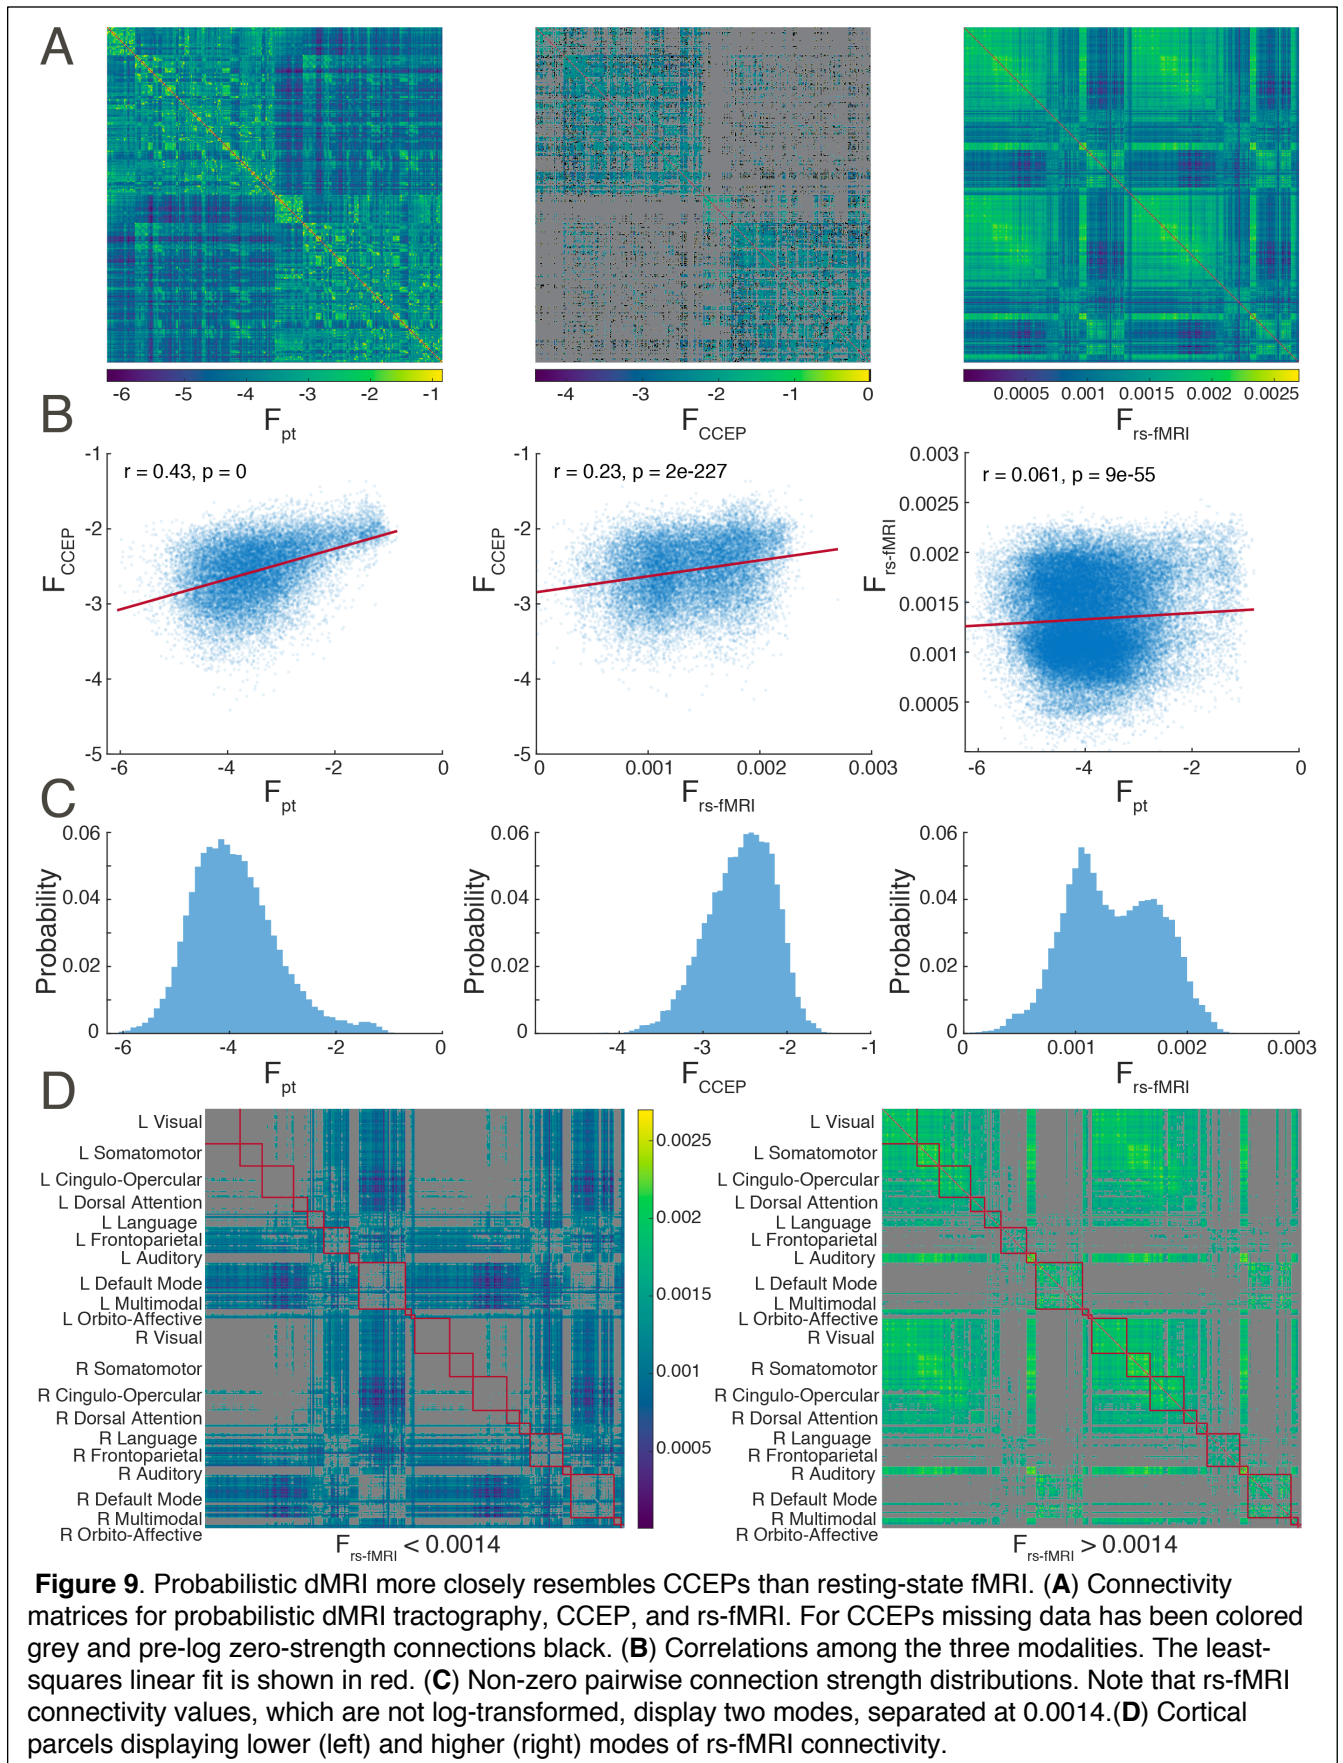

1125

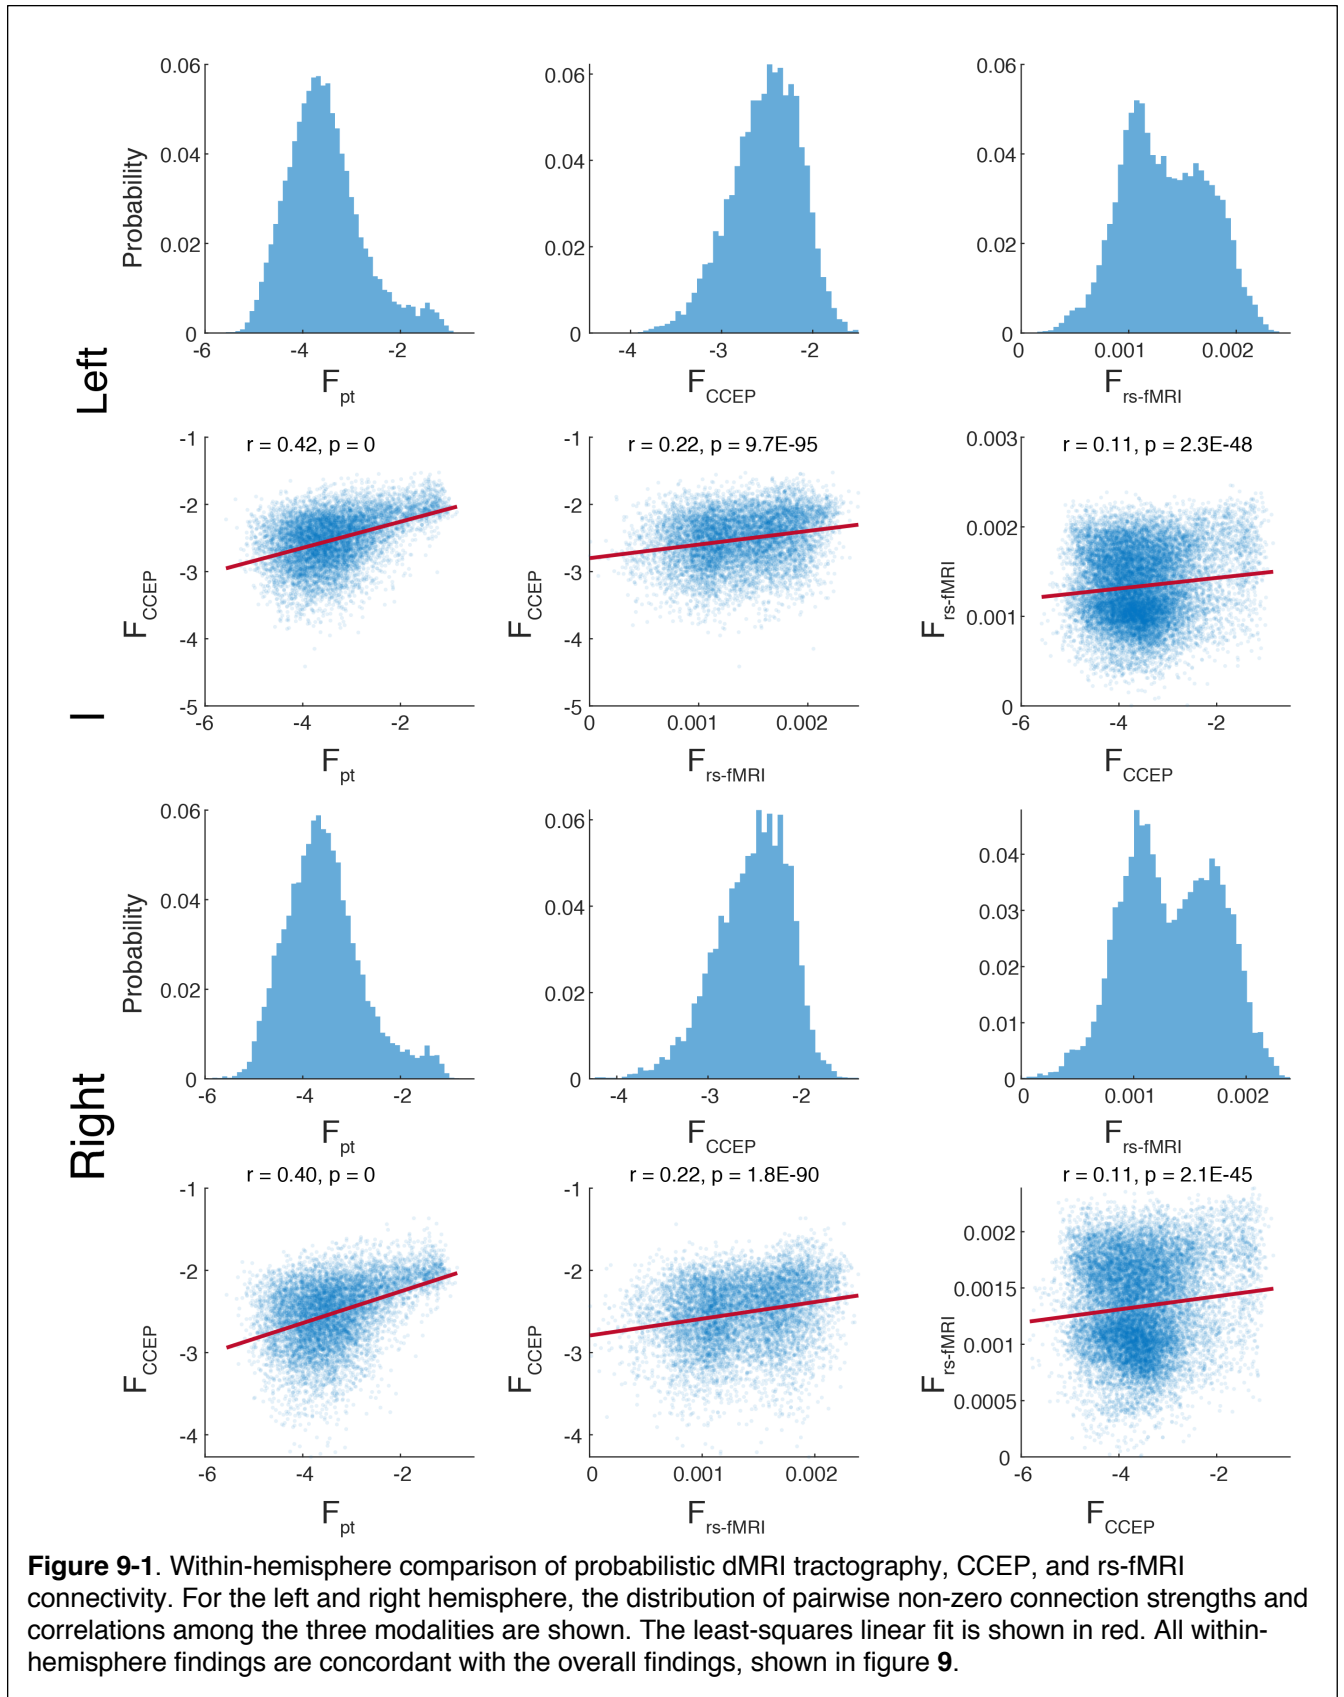

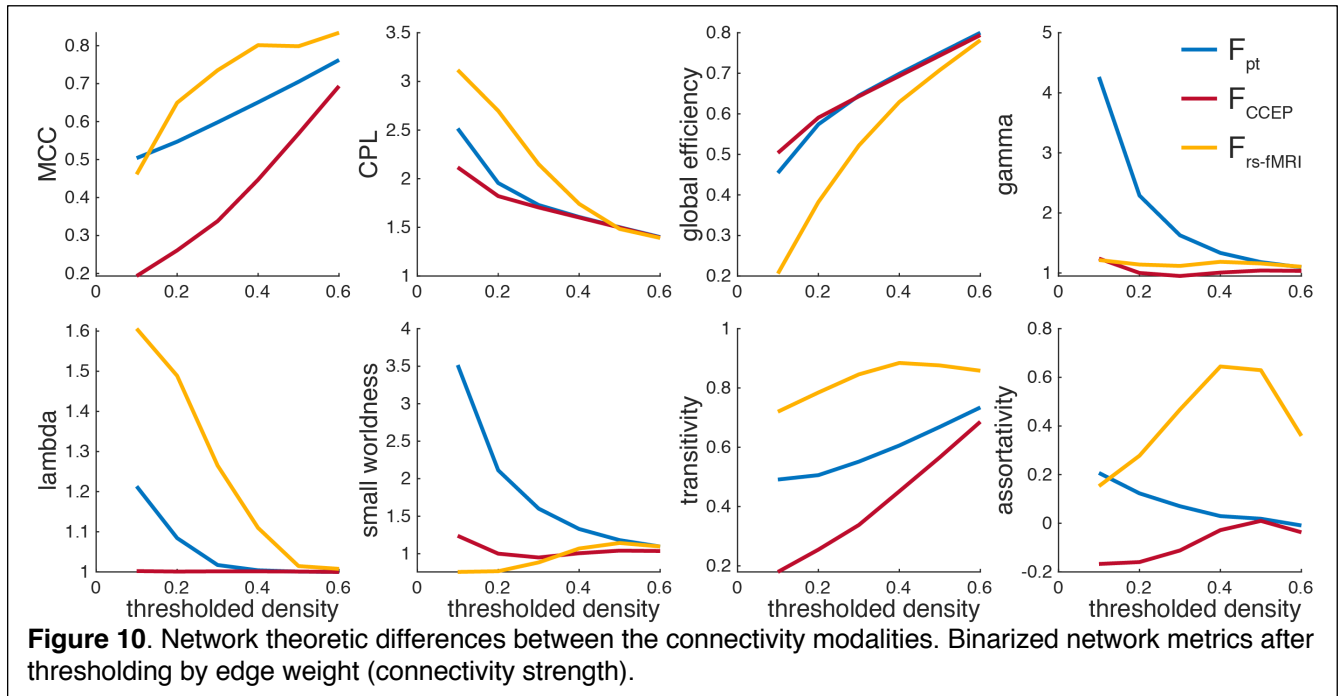

**Figure 10.** Network theoretic differences between the connectivity modalities. Binarized network metrics after thresholding by edge weight (connectivity strength).

1126

1127

1128

| <b>Connectome Features</b>                                                                                    |
|---------------------------------------------------------------------------------------------------------------|
| Probabilistic methodology sensitive to weak connections yielding a fully-populated, un-thresholded connectome |
| Cortex parcellated into the standardized, relatively dense, and functionally relevant HCP-MMP1.0 atlas        |
| Large normative sample size (N = 1,065)                                                                       |
| Enables comparison with other measures in the WU-Minn HCP and other cohorts                                   |

**Table 1.** Connectome Features

| <b>Idx.</b> | <b>Parcel</b> | <b>Orig.</b> | <b>Network</b>    | <b>Idx.</b> | <b>Parcel</b> | <b>Orig.</b> | <b>Network</b>    | <b>Idx.</b> | <b>Parcel</b> | <b>Orig.</b> | <b>Network</b>   |
|-------------|---------------|--------------|-------------------|-------------|---------------|--------------|-------------------|-------------|---------------|--------------|------------------|
| <b>1</b>    | V1            | 1            | Cingulo-Opercular | <b>61</b>   | 46            | 84           | Cingulo-Opercular | <b>121</b>  | IP1           | 145          | Frontoparietal   |
| <b>2</b>    | ProS          | 121          | Visual            | <b>62</b>   | 9-46d         | 86           | Cingulo-Opercular | <b>122</b>  | PFm           | 149          | Frontoparietal   |
| <b>3</b>    | DVT           | 142          | Visual            | <b>63</b>   | 43            | 99           | Cingulo-Opercular | <b>123</b>  | p10p          | 170          | Frontoparietal   |
| <b>4</b>    | MST           | 2            | Visual            | <b>64</b>   | PFcm          | 105          | Cingulo-Opercular | <b>124</b>  | p47r          | 171          | Frontoparietal   |
| <b>5</b>    | V6            | 3            | Visual            | <b>65</b>   | Pol2          | 106          | Cingulo-Opercular | <b>125</b>  | A1            | 24           | Auditory         |
| <b>6</b>    | V2            | 4            | Visual            | <b>66</b>   | FOP4          | 108          | Cingulo-Opercular | <b>126</b>  | 52            | 103          | Auditory         |
| <b>7</b>    | V3            | 5            | Visual            | <b>67</b>   | MI            | 109          | Cingulo-Opercular | <b>127</b>  | RI            | 104          | Auditory         |
| <b>8</b>    | V4            | 6            | Visual            | <b>68</b>   | FOP1          | 113          | Cingulo-Opercular | <b>128</b>  | TA2           | 107          | Auditory         |
| <b>9</b>    | V8            | 7            | Visual            | <b>69</b>   | FOP3          | 114          | Cingulo-Opercular | <b>129</b>  | PBelt         | 124          | Auditory         |
| <b>10</b>   | V3A           | 13           | Visual            | <b>70</b>   | PFop          | 147          | Cingulo-Opercular | <b>130</b>  | MBelt         | 173          | Auditory         |
| <b>11</b>   | V7            | 16           | Visual            | <b>71</b>   | PF            | 148          | Cingulo-Opercular | <b>131</b>  | LBelt         | 174          | Auditory         |
| <b>12</b>   | IPS1          | 17           | Visual            | <b>72</b>   | Pol1          | 167          | Cingulo-Opercular | <b>132</b>  | A4            | 175          | Auditory         |
| <b>13</b>   | FFC           | 18           | Visual            | <b>73</b>   | FOP5          | 169          | Cingulo-Opercular | <b>133</b>  | 7m            | 30           | Default Mode     |
| <b>14</b>   | V3B           | 19           | Visual            | <b>74</b>   | PI            | 178          | Cingulo-Opercular | <b>134</b>  | POS1          | 31           | Default Mode     |
| <b>15</b>   | LO1           | 20           | Visual            | <b>75</b>   | a32pr         | 179          | Cingulo-Opercular | <b>135</b>  | 23d           | 32           | Default Mode     |
| <b>16</b>   | LO2           | 21           | Visual            | <b>76</b>   | p24           | 180          | Cingulo-Opercular | <b>136</b>  | v23ab         | 33           | Default Mode     |
| <b>17</b>   | PIT           | 22           | Visual            | <b>77</b>   | PEF           | 11           | Dorsal Attention  | <b>137</b>  | d23ab         | 34           | Default Mode     |
| <b>18</b>   | MT            | 23           | Visual            | <b>78</b>   | 7PL           | 46           | Dorsal Attention  | <b>138</b>  | 31pv          | 35           | Default Mode     |
| <b>19</b>   | LIPv          | 48           | Visual            | <b>79</b>   | MIP           | 50           | Dorsal Attention  | <b>139</b>  | a24           | 61           | Default Mode     |
| <b>20</b>   | VIP           | 49           | Visual            | <b>80</b>   | LIPd          | 95           | Dorsal Attention  | <b>140</b>  | d32           | 62           | Default Mode     |
| <b>21</b>   | PH            | 138          | Visual            | <b>81</b>   | 6a            | 96           | Dorsal Attention  | <b>141</b>  | p32           | 64           | Default Mode     |
| <b>22</b>   | V6A           | 152          | Visual            | <b>82</b>   | PFt           | 116          | Dorsal Attention  | <b>142</b>  | 10r           | 65           | Default Mode     |
| <b>23</b>   | VMV1          | 153          | Visual            | <b>83</b>   | AIP           | 117          | Dorsal Attention  | <b>143</b>  | 47m           | 66           | Default Mode     |
| <b>24</b>   | VMV3          | 154          | Visual            | <b>84</b>   | PHA3          | 127          | Dorsal Attention  | <b>144</b>  | 8Av           | 67           | Default Mode     |
| <b>25</b>   | V4t           | 156          | Visual            | <b>85</b>   | TE2p          | 136          | Dorsal Attention  | <b>145</b>  | 8Ad           | 68           | Default Mode     |
| <b>26</b>   | FST           | 157          | Visual            | <b>86</b>   | PHT           | 137          | Dorsal Attention  | <b>146</b>  | 9m            | 69           | Default Mode     |
| <b>27</b>   | V3CD          | 158          | Visual            | <b>87</b>   | PGp           | 143          | Dorsal Attention  | <b>147</b>  | 8BL           | 70           | Default Mode     |
| <b>28</b>   | LO3           | 159          | Visual            | <b>88</b>   | IP0           | 146          | Dorsal Attention  | <b>148</b>  | 9p            | 71           | Default Mode     |
| <b>29</b>   | VMV2          | 160          | Visual            | <b>89</b>   | 55b           | 12           | Language          | <b>149</b>  | 10d           | 72           | Default Mode     |
| <b>30</b>   | VVC           | 163          | Visual            | <b>90</b>   | PSL           | 25           | Language          | <b>150</b>  | 47l           | 76           | Default Mode     |
| <b>31</b>   | 4             | 8            | Somatomotor       | <b>91</b>   | SFL           | 26           | Language          | <b>151</b>  | 9a            | 87           | Default Mode     |
| <b>32</b>   | 3b            | 9            | Somatomotor       | <b>92</b>   | STV           | 28           | Language          | <b>152</b>  | 10v           | 88           | Default Mode     |
| <b>33</b>   | 5m            | 36           | Somatomotor       | <b>93</b>   | 44            | 74           | Language          | <b>153</b>  | 10pp          | 90           | Default Mode     |
| <b>34</b>   | 5L            | 39           | Somatomotor       | <b>94</b>   | 45            | 75           | Language          | <b>154</b>  | OFC           | 93           | Default Mode     |
| <b>35</b>   | 24dd          | 40           | Somatomotor       | <b>95</b>   | IFJa          | 79           | Language          | <b>155</b>  | 47s           | 94           | Default Mode     |
| <b>36</b>   | 24dv          | 41           | Somatomotor       | <b>96</b>   | IFSp          | 81           | Language          | <b>156</b>  | EC            | 118          | Default Mode     |
| <b>37</b>   | 7AL           | 42           | Somatomotor       | <b>97</b>   | STGa          | 123          | Language          | <b>157</b>  | PreS          | 119          | Default Mode     |
| <b>38</b>   | 7PC           | 47           | Somatomotor       | <b>98</b>   | A5            | 125          | Language          | <b>158</b>  | H             | 120          | Default Mode     |
| <b>39</b>   | 1             | 51           | Somatomotor       | <b>99</b>   | STSda         | 128          | Language          | <b>159</b>  | PHA1          | 126          | Default Mode     |
| <b>40</b>   | 2             | 52           | Somatomotor       | <b>100</b>  | STSdp         | 129          | Language          | <b>160</b>  | STSvp         | 130          | Default Mode     |
| <b>41</b>   | 3a            | 53           | Somatomotor       | <b>101</b>  | TPOJ1         | 139          | Language          | <b>161</b>  | TGd           | 131          | Default Mode     |
| <b>42</b>   | 6d            | 54           | Somatomotor       | <b>102</b>  | TGv           | 172          | Language          | <b>162</b>  | TE1a          | 132          | Default Mode     |
| <b>43</b>   | 6mp           | 55           | Somatomotor       | <b>103</b>  | RSC           | 14           | Frontoparietal    | <b>163</b>  | TE2a          | 134          | Default Mode     |
| <b>44</b>   | 6v            | 56           | Somatomotor       | <b>104</b>  | POS2          | 15           | Frontoparietal    | <b>164</b>  | PGi           | 150          | Default Mode     |
| <b>45</b>   | OP4           | 100          | Somatomotor       | <b>105</b>  | 7Pm           | 29           | Frontoparietal    | <b>165</b>  | PGs           | 151          | Default Mode     |
| <b>46</b>   | OP1           | 101          | Somatomotor       | <b>106</b>  | 8BM           | 63           | Frontoparietal    | <b>166</b>  | PHA2          | 155          | Default Mode     |
| <b>47</b>   | OP2-3         | 102          | Somatomotor       | <b>107</b>  | 8C            | 73           | Frontoparietal    | <b>167</b>  | 31pd          | 161          | Default Mode     |
| <b>48</b>   | FOP2          | 115          | Somatomotor       | <b>108</b>  | a47r          | 77           | Frontoparietal    | <b>168</b>  | 31a           | 162          | Default Mode     |
| <b>49</b>   | Ig            | 168          | Somatomotor       | <b>109</b>  | IFJp          | 80           | Frontoparietal    | <b>169</b>  | 25            | 164          | Default Mode     |
| <b>50</b>   | FEF           | 10           | Cingulo-Opercular | <b>110</b>  | IFSa          | 82           | Frontoparietal    | <b>170</b>  | s32           | 165          | Default Mode     |
| <b>51</b>   | 5mv           | 37           | Cingulo-Opercular | <b>111</b>  | p9-46v        | 83           | Frontoparietal    | <b>171</b>  | STSva         | 176          | Default Mode     |
| <b>52</b>   | 23c           | 38           | Cingulo-Opercular | <b>112</b>  | a9-46v        | 85           | Frontoparietal    | <b>172</b>  | TE1m          | 177          | Default Mode     |
| <b>53</b>   | SCEF          | 43           | Cingulo-Opercular | <b>113</b>  | a10p          | 89           | Frontoparietal    | <b>173</b>  | PCV           | 27           | Multimodal       |
| <b>54</b>   | 6ma           | 44           | Cingulo-Opercular | <b>114</b>  | 11l           | 91           | Frontoparietal    | <b>174</b>  | TPOJ2         | 140          | Multimodal       |
| <b>55</b>   | 7Am           | 45           | Cingulo-Opercular | <b>115</b>  | 13l           | 92           | Frontoparietal    | <b>175</b>  | TPOJ3         | 141          | Multimodal       |
| <b>56</b>   | p24pr         | 57           | Cingulo-Opercular | <b>116</b>  | i6-8          | 97           | Frontoparietal    | <b>176</b>  | PeEc          | 122          | Multimodal       |
| <b>57</b>   | 33pr          | 58           | Cingulo-Opercular | <b>117</b>  | s6-8          | 98           | Frontoparietal    | <b>177</b>  | TF            | 135          | Multimodal       |
| <b>58</b>   | a24pr         | 59           | Cingulo-Opercular | <b>118</b>  | AVI           | 111          | Frontoparietal    | <b>178</b>  | Pir           | 110          | Orbito-Affective |
| <b>59</b>   | p32pr         | 60           | Cingulo-Opercular | <b>119</b>  | TE1p          | 133          | Frontoparietal    | <b>179</b>  | AAIC          | 112          | Orbito-Affective |
| <b>60</b>   | 6r            | 78           | Cingulo-Opercular | <b>120</b>  | IP2           | 144          | Frontoparietal    | <b>180</b>  | pOFC          | 166          | Orbito-Affective |

**Table 2.** Parcel order and network assignment. The emboldened indices refer to the parcel order in figure 1A. The Orig. indices refer to the original parcel order presented in (Glasser et al., 2016). All indices refer to the left hemisphere, adding 180 yields the homologous right hemisphere indices.

2  
3  
4  
5  
6  
7  
8  
9

| Location   | Data structure                             | Test or analysis                                 | N      | Uncertainty [CI <sub>95%</sub> ] |
|------------|--------------------------------------------|--------------------------------------------------|--------|----------------------------------|
| Fig 1-1D   | Gaussian predictor<br>Exponential response | Nonlinear regression<br>(iterative optimization) | 64,620 | $\lambda = 23.8$ [23.5 24.0]     |
|            |                                            |                                                  | 64,620 | $\lambda = 22.8$ [22.7 22.9]     |
|            |                                            |                                                  | 64,620 | $\lambda = 22.2$ [22.1 22.2]     |
|            |                                            |                                                  | 64,620 | $\lambda = 23.4$ [23.3 23.6]     |
| Fig 2A     | Gaussian predictor<br>Exponential response | Nonlinear regression<br>(iterative optimization) | 16,110 | $\lambda = 23.1$ [22.8 23.3]     |
| Fig 2B     | Gaussian predictor<br>Exponential response | Nonlinear regression<br>(iterative optimization) | 16,110 | $\lambda = 23.9$ [23.7 24.2]     |
| Fig 2C     | Gaussian predictor<br>Exponential response | Nonlinear regression<br>(iterative optimization) | 32,400 | $\lambda = 32.8$ [32.5 33.0]     |
| Fig 2D     | Gaussian predictor<br>Exponential response | Nonlinear regression<br>(iterative optimization) | 64,620 | $\lambda = 23.4$ [23.3 23.6]     |
| Fig 2-2B   | Gaussian predictor<br>Gaussian response    | Linear correlation                               | 1,065  | $r = -0.14$ [-0.20 -0.08]        |
| Fig 3D     | Gaussian predictor<br>Exponential response | Nonlinear regression<br>(iterative optimization) | 12,924 | $\lambda = 27.8$ [27.4 28.2]     |
| Fig 3F     | Gaussian predictor<br>Gaussian response    | Linear correlation                               | 1,065  | $r = 0.70$ [0.67 0.73]           |
| Fig 4C     | Gaussian predictor<br>Gaussian response    | Linear correlation                               | 80     | $r = 0.35$ [0.14 0.53]           |
| Fig 8A     | Gaussian predictor<br>Gaussian response    | Linear correlation                               | 16,110 | $r = -0.10$ [-0.12 -0.09]        |
|            |                                            |                                                  | 16,110 | $r = -0.12$ [-0.13 -0.10]        |
|            |                                            |                                                  | 32,400 | $r = -0.11$ [-0.12 -0.10]        |
| Fig 8B     | Gaussian predictor<br>Gaussian response    | Linear correlation                               | 351    | $r = -0.17$ [-0.27 -0.06]        |
|            |                                            |                                                  | 351    | $r = -0.13$ [-0.23 -0.02]        |
|            |                                            |                                                  | 66     | $r = -0.41$ [-0.60 -0.19]        |
|            |                                            |                                                  | 91     | $r = -0.26$ [-0.44 -0.06]        |
|            |                                            |                                                  | 231    | $r = -0.30$ [-0.42 -0.18]        |
|            |                                            |                                                  | 231    | $r = -0.30$ [-0.40 -0.17]        |
|            |                                            |                                                  | 28     | $r = -0.56$ [-0.77 -0.24]        |
|            |                                            |                                                  | 780    | $r = -0.12$ [-0.19 -0.05]        |
|            |                                            |                                                  | 780    | $r = -0.17$ [-0.24 -0.10]        |
| 10         | $r = -0.74$ [-0.93 -0.20]                  |                                                  |        |                                  |
| Fig 9B     | Gaussian predictor<br>Gaussian response    | Linear correlation                               | 19,667 | $r = 0.43$ [0.42 0.44]           |
|            |                                            |                                                  | 19,667 | $r = 0.23$ [0.21 0.24]           |
|            |                                            |                                                  | 64,620 | $r = 0.06$ [0.05 0.07]           |
| Figure 9-1 | Gaussian predictor<br>Gaussian response    | Linear correlation                               | 8,483  | $r = 0.42$ [0.40 0.44]           |
|            |                                            |                                                  | 8,483  | $r = 0.22$ [0.20 0.24]           |
|            |                                            |                                                  | 16,110 | $r = 0.06$ [0.05 0.07]           |
|            |                                            |                                                  | 8,370  | $r = 0.40$ [0.38 0.42]           |
|            |                                            |                                                  | 8,370  | $r = 0.22$ [0.20 0.24]           |
|            |                                            |                                                  | 16,110 | $r = 0.11$ [0.10 0.13]           |

**Table 3.** Statistics and uncertainty. Where multiple uncertainties are listed for a figure panel, they correspond to the statistics read left-to-right, top-to-bottom in that panel. For figure 8B only uncertainties for significant correlations are listed. Uncertainties for figures 6, 7, 8 and 10 are not shown. Figure 6-1 contains bootstrapped 95% confidence intervals for the 180 means shown in figure 6,  $n = 179$ . Figure 7 shows Bootstrapped 95% confidence intervals in gray; the values of these intervals for all distance bins are available in the figure source data at <https://doi.org/10.5281/zenodo.4060485>. For figure 10 means across shuffled matrices are only necessary to account for arbitrary ordering among tied edge weights and the bootstrapped 95% confidence intervals for these means are vanishingly small. The values of these intervals at all network densities are also included in the figure source data. For nonlinear regressions confidence intervals are estimated using  $R^{-1}$ , the inverse  $R$  factor from  $QR$  decomposition of the Jacobian, the degrees of freedom for error, and the root mean squared error. For linear correlations the confidence intervals are based on an asymptotic normal distribution of  $0.5 \cdot \log((1+r)/(1-r))$ , with an approximate variance equal to  $1/(N-3)$ . For descriptive statistics, e.g. means, empirical 95% confidence intervals are estimated by bootstrapping with
